# Supplementary material
Source: publisher site journal article supplement (https://www.dovepress.com/get_supplementary_file.php?f=253631-1.xlsx)
Supplement: Supplementary file 1 [file get_supplementary_file.php]

## Sheet: Sheet1
organism	isolation_source	host	assembly level	country	mlst	head
Klebsiella pneumoniae subsp. pneumoniae KPNIH1	groin	Homo sapiens	chromosome	USA	258	GCA_000281535.2_ASM28153v2_genomic.gbff
Klebsiella pneumoniae subsp. pneumoniae Kp13	blood	Homo sapiens	chromosome	Brazil	442	GCA_000512165.1_ASM51216v1_genomic.gbff
Klebsiella pneumoniae 30684/NJST258_2	urinary tract infection	Homo sapiens	chromosome	USA	258	GCA_000597905.1_ASM59790v1_genomic.gbff
Klebsiella pneumoniae 30660/NJST258_1	urinary tract infection	Homo sapiens	chromosome	USA	258	GCA_000598005.1_ASM59800v1_genomic.gbff
Klebsiella pneumoniae	0	Homo sapiens	chromosome	Nepal	15	GCA_000764615.1_ASM76461v1_genomic.gbff
Klebsiella pneumoniae subsp. pneumoniae	urine	Homo sapiens	chromosome	USA	258	GCA_000775375.1_ASM77537v1_genomic.gbff
Klebsiella pneumoniae subsp. pneumoniae	perirectal swab	Homo sapiens	chromosome	USA	1518	GCA_000784945.1_ASM78494v1_genomic.gbff
Klebsiella pneumoniae subsp. pneumoniae	perirectal swab	Homo sapiens	chromosome	USA	258	GCA_000784985.1_ASM78498v1_genomic.gbff
Klebsiella pneumoniae subsp. pneumoniae	urine	Homo sapiens	chromosome	USA	392	GCA_000785005.1_ASM78500v1_genomic.gbff
Klebsiella pneumoniae	Excreted bodily substance	Homo sapiens	chromosome	USA	258	GCA_000807395.3_ASM80739v3_genomic.gbff
Klebsiella pneumoniae	Bodily fluid	Homo sapiens	chromosome	USA	258	GCA_000814305.1_ASM81430v1_genomic.gbff
Klebsiella pneumoniae subsp. pneumoniae 1158	0	Homo sapiens	chromosome	Taiwan	65	GCA_000814805.1_ASM81480v1_genomic.gbff
Klebsiella pneumoniae subsp. pneumoniae	0	Homo sapiens	chromosome	Germany	514	GCA_000981845.1_ASM98184v1_genomic.gbff
Klebsiella pneumoniae	Sputum	Homo sapiens	chromosome	USA	11	GCA_001022035.1_ASM102203v1_genomic.gbff
Klebsiella pneumoniae	Urine	Homo sapiens	chromosome	USA	941	GCA_001022175.1_ASM102217v1_genomic.gbff
Klebsiella pneumoniae	Perirectal	Homo sapiens	chromosome	USA	258	GCA_001022235.1_ASM102223v1_genomic.gbff
Klebsiella pneumoniae subsp. pneumoniae	0	Homo sapiens	chromosome	South Africa	101	GCA_001316565.3_ASM131656v3_genomic.gbff
Klebsiella pneumoniae	urine	Homo sapiens	chromosome	United Arab Emirates	147	GCA_001455995.1_MS6671.v1_genomic.gbff
Klebsiella pneumoniae	urine	Homo sapiens	chromosome	Canada	278	GCA_001456055.3_ASM145605v3_genomic.gbff
Klebsiella pneumoniae	blood	Homo sapiens	chromosome	Canada	278	GCA_001456095.3_ASM145609v3_genomic.gbff
Klebsiella pneumoniae	Respiratory	Homo sapiens	chromosome	USA	941	GCA_001456135.1_ASM145613v1_genomic.gbff
Klebsiella pneumoniae subsp. pneumoniae	urine	Homo sapiens	chromosome	China	14	GCA_001521895.1_ASM152189v1_genomic.gbff
Klebsiella pneumoniae subsp. pneumoniae	blood	Homo sapiens	chromosome	China	23	GCA_001529935.1_ASM152993v1_genomic.gbff
Klebsiella pneumoniae subsp. pneumoniae	blood	Homo sapiens	chromosome	China	374	GCA_001530015.1_ASM153001v1_genomic.gbff
Klebsiella pneumoniae subsp. pneumoniae	CVC	Homo sapiens	chromosome	Greece	383	GCA_001611055.1_ASM161105v1_genomic.gbff
Klebsiella pneumoniae subsp. pneumoniae	wound swab	Homo sapiens	chromosome	Greece	383	GCA_001611095.1_ASM161109v1_genomic.gbff
Klebsiella pneumoniae	Urine sample	Homo sapiens	chromosome	United Arab Emirates	147	GCA_001644765.1_ASM164476v1_genomic.gbff
Klebsiella pneumoniae	fecal sample	Homo sapiens	chromosome	China	1536	GCA_001646625.1_ASM164662v1_genomic.gbff
Klebsiella pneumoniae	0	Homo sapiens	chromosome	USA	147	GCA_001648215.1_ASM164821v1_genomic.gbff
Klebsiella pneumoniae	0	Homo sapiens	chromosome	China	15	GCA_001663195.1_ASM166319v1_genomic.gbff
Klebsiella pneumoniae	0	Homo sapiens	chromosome	USA	37	GCA_001663295.1_ASM166329v1_genomic.gbff
Klebsiella pneumoniae	0	Homo sapiens	chromosome	USA	273	GCA_001663435.1_ASM166343v1_genomic.gbff
Klebsiella pneumoniae	0	Homo sapiens	chromosome	USA	2623	GCA_001663455.1_ASM166345v1_genomic.gbff
Klebsiella pneumoniae	0	Homo sapiens	chromosome	USA	258	GCA_001675125.1_ASM167512v1_genomic.gbff
Klebsiella pneumoniae	Stool	Homo sapiens	chromosome	Greece	147	GCA_001701425.2_ASM170142v2_genomic.gbff
Klebsiella pneumoniae	Stool	Homo sapiens	chromosome	Greece	11	GCA_001701835.2_ASM170183v2_genomic.gbff
Klebsiella pneumoniae	Stool	Homo sapiens	chromosome	Greece	258	GCA_001701845.2_ASM170184v2_genomic.gbff
Klebsiella pneumoniae	Urine	Homo sapiens	chromosome	Greece	258	GCA_001702045.2_ASM170204v2_genomic.gbff
Klebsiella pneumoniae	Urine	Homo sapiens	chromosome	USA	34	GCA_001704235.1_ASM170423v1_genomic.gbff
Klebsiella pneumoniae	blood	Homo sapiens	chromosome	Switzerland	512	GCA_001705385.1_ASM170538v1_genomic.gbff
Klebsiella pneumoniae	blood	Homo sapiens	chromosome	Taiwan	23	GCA_001708225.1_ASM170822v1_genomic.gbff
Klebsiella pneumoniae	blood	Homo sapiens	chromosome	Taiwan	23	GCA_001708245.1_ASM170824v1_genomic.gbff
Klebsiella pneumoniae	Urine	Homo sapiens	chromosome	USA	14	GCA_001709275.1_ASM170927v1_genomic.gbff
Klebsiella pneumoniae	Tracheal Aspirate	Homo sapiens	chromosome	USA	14	GCA_001709295.1_ASM170929v1_genomic.gbff
Klebsiella pneumoniae	Respiratory	Homo sapiens	chromosome	USA	16	GCA_001721725.1_ASM172172v1_genomic.gbff
Klebsiella pneumoniae	Rectal	Homo sapiens	chromosome	USA	16	GCA_001741545.1_ASM174154v1_genomic.gbff
Klebsiella pneumoniae	abdominal drainage	Homo sapiens	chromosome	USA	16	GCA_001741665.1_ASM174166v1_genomic.gbff
Klebsiella pneumoniae subsp. pneumoniae	rectal	Homo sapiens	chromosome	Greece	147	GCA_001746535.1_ASM174653v1_genomic.gbff
Klebsiella pneumoniae	urine	Homo sapiens	chromosome	Taiwan	15	GCA_001750805.1_ASM175080v1_genomic.gbff
Klebsiella pneumoniae	Hospital	Homo sapiens	chromosome	Singapore	147	GCA_001855315.1_ASM185531v1_genomic.gbff
Klebsiella pneumoniae	Abdominal Abscess	Homo sapiens	chromosome	USA	45	GCA_001870165.1_ASM187016v1_genomic.gbff
Klebsiella pneumoniae	nose	Homo sapiens	chromosome	Germany	147	GCA_001885255.2_ASM188525v2_genomic.gbff
Klebsiella pneumoniae	sputum	Homo sapiens	chromosome	China	1	GCA_001887995.2_ASM188799v2_genomic.gbff
Klebsiella pneumoniae	Wound	Homo sapiens	chromosome	USA	258	GCA_001902195.1_ASM190219v1_genomic.gbff
Klebsiella pneumoniae	Urine	Homo sapiens	chromosome	USA	258	GCA_001902215.1_ASM190221v1_genomic.gbff
Klebsiella pneumoniae	Wound	Homo sapiens	chromosome	USA	258	GCA_001902235.1_ASM190223v1_genomic.gbff
Klebsiella pneumoniae	Perirectal	Homo sapiens	chromosome	USA	258	GCA_001902255.1_ASM190225v1_genomic.gbff
Klebsiella pneumoniae	wound swab	Homo sapiens	chromosome	Germany	23	GCA_001902335.1_ASM190233v1_genomic.gbff
Klebsiella pneumoniae	urine	Homo sapiens	chromosome	Germany	395	GCA_001902355.1_ASM190235v1_genomic.gbff
Klebsiella pneumoniae	tracheal secretion	Homo sapiens	chromosome	Germany	15	GCA_001902395.1_ASM190239v1_genomic.gbff
Klebsiella pneumoniae	skin swab	Homo sapiens	chromosome	Germany	11	GCA_001902415.1_ASM190241v1_genomic.gbff
Klebsiella pneumoniae	wound swab	Homo sapiens	chromosome	Germany	101	GCA_001902435.1_ASM190243v1_genomic.gbff
Klebsiella pneumoniae	urine sample	Homo sapiens	chromosome	Germany	101	GCA_001902515.1_ASM190251v1_genomic.gbff
Klebsiella pneumoniae	Urine/Genitourinary	Homo sapiens	chromosome	USA	340	GCA_001902535.1_ASM190253v1_genomic.gbff
Klebsiella pneumoniae	Urine	Homo sapiens	chromosome	USA	244	GCA_001908515.1_ASM190851v1_genomic.gbff
Klebsiella pneumoniae	tracheal secretion	Homo sapiens	chromosome	Germany	147	GCA_001908595.1_ASM190859v1_genomic.gbff
Klebsiella pneumoniae	abdominal drainage fluid	Homo sapiens	chromosome	Germany	147	GCA_001908625.1_ASM190862v1_genomic.gbff
Klebsiella pneumoniae	nasal swab	Homo sapiens	chromosome	Germany	147	GCA_001908655.1_ASM190865v1_genomic.gbff
Klebsiella pneumoniae	abdominal drainage fluid	Homo sapiens	chromosome	Germany	147	GCA_001908675.1_ASM190867v1_genomic.gbff
Klebsiella pneumoniae	anal swab	Homo sapiens	chromosome	Germany	147	GCA_001908695.1_ASM190869v1_genomic.gbff
Klebsiella pneumoniae	Urine	Homo sapiens	chromosome	USA	340	GCA_001908715.1_ASM190871v1_genomic.gbff
Klebsiella pneumoniae	abdominal drain fluid	Homo sapiens	chromosome	Germany	147	GCA_001908875.1_ASM190887v1_genomic.gbff
Klebsiella pneumoniae	anal swab	Homo sapiens	chromosome	Germany	11	GCA_001908895.1_ASM190889v1_genomic.gbff
Klebsiella pneumoniae	urine sample	Homo sapiens	chromosome	Germany	101	GCA_001913175.1_ASM191317v1_genomic.gbff
Klebsiella pneumoniae	pus	Homo sapiens	chromosome	Taiwan	2549	GCA_001952835.1_ASM195283v1_genomic.gbff
Klebsiella pneumoniae	0	Homo sapiens	chromosome	USA	392	GCA_001952875.1_ASM195287v1_genomic.gbff
Klebsiella pneumoniae	0	Homo sapiens	chromosome	USA	340	GCA_001952895.1_ASM195289v1_genomic.gbff
Klebsiella pneumoniae	0	Homo sapiens	chromosome	USA	258	GCA_001952915.1_ASM195291v1_genomic.gbff
Klebsiella pneumoniae	anal swab	Homo sapiens	chromosome	Germany	147	GCA_001956965.1_ASM195696v1_genomic.gbff
Klebsiella pneumoniae	Urine	Homo sapiens	chromosome	Norway	11	GCA_002113865.1_ASM211386v1_genomic.gbff
Klebsiella pneumoniae	0	Homo sapiens	chromosome	USA	86	GCA_002116885.1_ASM211688v1_genomic.gbff
Klebsiella pneumoniae	0	Homo sapiens	chromosome	USA	258	GCA_002156725.1_ASM215672v1_genomic.gbff
Klebsiella pneumoniae	respiratory	Homo sapiens	chromosome	USA	37	GCA_002156745.1_ASM215674v1_genomic.gbff
Klebsiella pneumoniae	respiratory	Homo sapiens	chromosome	USA	14	GCA_002156785.1_ASM215678v1_genomic.gbff
Klebsiella pneumoniae subsp. pneumoniae	sputum	Homo sapiens	chromosome	China	23	GCA_002163895.1_ASM216389v1_genomic.gbff
Klebsiella pneumoniae	0	Homo sapiens	chromosome	China	11	GCA_002164855.2_ASM216485v2_genomic.gbff
Klebsiella pneumoniae	wound	Homo sapiens	chromosome	USA	15	GCA_002211905.1_ASM221190v1_genomic.gbff
Klebsiella pneumoniae	0	Homo sapiens	chromosome	France	258	GCA_002243445.1_ASM224344v1_genomic.gbff
Klebsiella pneumoniae subsp. pneumoniae	Patient urine	Homo sapiens	chromosome	Australia	258	GCA_002249975.3_ASM224997v3_genomic.gbff
Klebsiella pneumoniae	0	Homo sapiens	chromosome	China	11	GCA_002257765.2_ASM225776v2_genomic.gbff
Klebsiella pneumoniae	urine	Homo sapiens	chromosome	China	11	GCA_002269295.1_ASM226929v1_genomic.gbff
Klebsiella pneumoniae	urine	Homo sapiens	chromosome	China	11	GCA_002278055.1_ASM227805v1_genomic.gbff
Klebsiella pneumoniae	blood	Homo sapiens	chromosome	India	231	GCA_002300675.2_ASM230067v2_genomic.gbff
Klebsiella pneumoniae	Wound	Homo sapiens	chromosome	Canada	11	GCA_002587165.1_ASM258716v1_genomic.gbff
Klebsiella pneumoniae	Rectal	Homo sapiens	chromosome	Canada	340	GCA_002587885.1_ASM258788v1_genomic.gbff
Klebsiella pneumoniae	Urine	Homo sapiens	chromosome	Canada	147	GCA_002591075.1_ASM259107v1_genomic.gbff
Klebsiella pneumoniae	blood	Homo sapiens	chromosome	India	101	GCA_002740955.2_ASM274095v2_genomic.gbff
Klebsiella pneumoniae	rectal swab	Homo sapiens	chromosome	Australia	340	GCA_002741685.1_ASM274168v1_genomic.gbff
Klebsiella pneumoniae	sputum	Homo sapiens	chromosome	Thailand	45	GCA_002752955.1_ASM275295v1_genomic.gbff
Klebsiella pneumoniae	Sputum	Homo sapiens	chromosome	China	23	GCA_002761315.1_ASM276131v1_genomic.gbff
Klebsiella pneumoniae subsp. pneumoniae	["separated from patient's sputum"]	Homo sapiens	chromosome	China	659	GCA_002761515.1_ASM276151v1_genomic.gbff
Klebsiella pneumoniae	Bronchial washing	Homo sapiens	chromosome	South Korea	147	GCA_002786755.1_ASM278675v1_genomic.gbff
Klebsiella pneumoniae	Peritoneal fluid	Homo sapiens	chromosome	South Korea	147	GCA_002787755.1_ASM278775v1_genomic.gbff
Klebsiella pneumoniae	0	Homo sapiens	chromosome	China	11	GCA_002811305.2_ASM281130v2_genomic.gbff
Klebsiella pneumoniae	0	Homo sapiens	chromosome	China	273	GCA_002811335.4_ASM281133v4_genomic.gbff
Klebsiella pneumoniae	Sacral swab	Homo sapiens	chromosome	Australia	258	GCA_002812365.1_ASM281236v1_genomic.gbff
Klebsiella pneumoniae	urine	Homo sapiens	chromosome	Australia	258	GCA_002812385.1_ASM281238v1_genomic.gbff
Klebsiella pneumoniae	urine	Homo sapiens	chromosome	USA	258	GCA_002812665.1_ASM281266v1_genomic.gbff
Klebsiella pneumoniae	liver abscess	Homo sapiens	chromosome	Singapore	23	GCA_002813595.1_ASM281359v1_genomic.gbff
Klebsiella pneumoniae	Sputum	Homo sapiens	chromosome	China	37	GCA_002814015.1_ASM281401v1_genomic.gbff
Klebsiella pneumoniae	bronchoalveolar lavage	Homo sapiens	chromosome	USA	307	GCA_002833425.1_ASM283342v1_genomic.gbff
Klebsiella pneumoniae	Pancreatic Fluid	Homo sapiens	chromosome	USA	307	GCA_002833445.1_ASM283344v1_genomic.gbff
Klebsiella pneumoniae	blood	Homo sapiens	chromosome	USA	307	GCA_002833465.1_ASM283346v1_genomic.gbff
Klebsiella pneumoniae	0	Homo sapiens	chromosome	China	11	GCA_002848545.1_ASM284854v1_genomic.gbff
Klebsiella pneumoniae	0	Homo sapiens	chromosome	China	11	GCA_002848565.1_ASM284856v1_genomic.gbff
Klebsiella pneumoniae	0	Homo sapiens	chromosome	China	11	GCA_002848585.1_ASM284858v1_genomic.gbff
Klebsiella pneumoniae subsp. pneumoniae	0	Homo sapiens	chromosome	China	11	GCA_002852365.2_ASM285236v2_genomic.gbff
Klebsiella pneumoniae	pus	Homo sapiens	chromosome	China	1	GCA_002852995.3_ASM285299v3_genomic.gbff
Klebsiella pneumoniae	0	Homo sapiens	chromosome	China	1	GCA_002853475.2_ASM285347v2_genomic.gbff
Klebsiella pneumoniae subsp. pneumoniae	0	Homo sapiens	chromosome	China	11	GCA_002893825.1_ASM289382v1_genomic.gbff
Klebsiella pneumoniae	blood	Homo sapiens	chromosome	India	231	GCA_002909775.2_ASM290977v2_genomic.gbff
Klebsiella pneumoniae	0	Homo sapiens	chromosome	China	86	GCA_002944845.1_ASM294484v1_genomic.gbff
Klebsiella pneumoniae subsp. pneumoniae	blood	Homo sapiens	chromosome	Brazil	437	GCA_002951555.1_ASM295155v1_genomic.gbff
Klebsiella pneumoniae subsp. pneumoniae	urine	Homo sapiens	chromosome	Brazil	437	GCA_002951595.1_ASM295159v1_genomic.gbff
Klebsiella pneumoniae	Urine	Homo sapiens	chromosome	USA	13	GCA_002951635.1_ASM295163v1_genomic.gbff
Klebsiella pneumoniae	blie	Homo sapiens	chromosome	China	34	GCA_002966875.1_ASM296687v1_genomic.gbff
Klebsiella pneumoniae subsp. pneumoniae	miscellaneous body fluid	Homo sapiens	chromosome	USA	395	GCA_002970375.3_ASM297037v3_genomic.gbff
Klebsiella pneumoniae	wound	Homo sapiens	chromosome	China	23	GCA_002970895.1_ASM297089v1_genomic.gbff
Klebsiella pneumoniae	Trachaeal secretion	Homo sapiens	chromosome	Pakistan	147	GCA_003006175.1_ASM300617v1_genomic.gbff
Klebsiella pneumoniae	human	Homo sapiens	chromosome	Denmark	512	GCA_003030045.1_ASM303004v1_genomic.gbff
Klebsiella pneumoniae	human	Homo sapiens	chromosome	Germany	15	GCA_003030145.1_ASM303014v1_genomic.gbff
Klebsiella pneumoniae	sputum	Homo sapiens	chromosome	Thailand	15	GCA_003031325.1_ASM303132v1_genomic.gbff
Klebsiella pneumoniae	rectal swab	Homo sapiens	chromosome	Thailand	147	GCA_003031345.1_ASM303134v1_genomic.gbff
Klebsiella pneumoniae	urine	Homo sapiens	chromosome	USA	258	GCA_003031505.1_ASM303150v1_genomic.gbff
Klebsiella pneumoniae	0	Homo sapiens	chromosome	China	11	GCA_003037005.2_ASM303700v2_genomic.gbff
Klebsiella pneumoniae subsp. pneumoniae	0	Homo sapiens	chromosome	China	48	GCA_003037615.2_ASM303761v2_genomic.gbff
Klebsiella pneumoniae	0	Homo sapiens	chromosome	Thailand	16	GCA_003073235.1_ASM307323v1_genomic.gbff
Klebsiella pneumoniae	urine	Homo sapiens	chromosome	Iran	307	GCA_003076555.1_ASM307655v1_genomic.gbff
Klebsiella pneumoniae	0	Homo sapiens	chromosome	Sweden	147	GCA_003181055.1_ASM318105v1_genomic.gbff
Klebsiella pneumoniae	0	Homo sapiens	chromosome	Sweden	16	GCA_003181095.1_ASM318109v1_genomic.gbff
Klebsiella pneumoniae	0	Homo sapiens	chromosome	Sweden	16	GCA_003181135.1_ASM318113v1_genomic.gbff
Klebsiella pneumoniae	urine	Homo sapiens	chromosome	USA	983	GCA_003186535.1_ASM318653v1_genomic.gbff
Klebsiella pneumoniae	urine	Homo sapiens	chromosome	Sweden	147	GCA_003194285.1_ASM319428v1_genomic.gbff
Klebsiella pneumoniae	0	Homo sapiens	chromosome	China	11	GCA_003261955.2_ASM326195v2_genomic.gbff
Klebsiella pneumoniae subsp. pneumoniae	0	Homo sapiens	chromosome	China	1755	GCA_003285145.1_ASM328514v1_genomic.gbff
Klebsiella pneumoniae subsp. pneumoniae	0	Homo sapiens	chromosome	China	29	GCA_003286975.1_ASM328697v1_genomic.gbff
Klebsiella pneumoniae subsp. pneumoniae	0	Homo sapiens	chromosome	China	1660	GCA_003286995.1_ASM328699v1_genomic.gbff
Klebsiella pneumoniae	blood	Homo sapiens	chromosome	United Kingdom	101	GCA_003363735.2_ASM336373v2_genomic.gbff
Klebsiella pneumoniae	urine	Homo sapiens	chromosome	China	11	GCA_003367555.1_ASM336755v1_genomic.gbff
Klebsiella pneumoniae subsp. pneumoniae	blood	Homo sapiens	chromosome	South Korea	14	GCA_003428845.1_ASM342884v1_genomic.gbff
Klebsiella pneumoniae	blood	Homo sapiens	chromosome	China	719	GCA_003429065.3_ASM342906v3_genomic.gbff
Klebsiella pneumoniae	urine	Homo sapiens	chromosome	Taiwan	11	GCA_003429545.1_ASM342954v1_genomic.gbff
Klebsiella pneumoniae	hospital	Homo sapiens	chromosome	Spain	54	GCA_003443755.1_ASM344375v1_genomic.gbff
Klebsiella pneumoniae	0	Homo sapiens	chromosome	Thailand	14	GCA_003574235.1_ASM357423v1_genomic.gbff
Klebsiella pneumoniae	0	Homo sapiens	chromosome	Thailand	14	GCA_003574255.1_ASM357425v1_genomic.gbff
Klebsiella pneumoniae	0	Homo sapiens	chromosome	Thailand	14	GCA_003574275.1_ASM357427v1_genomic.gbff
Klebsiella pneumoniae	Rectal swab	Homo sapiens	chromosome	South Korea	307	GCA_003597695.1_ASM359769v1_genomic.gbff
Klebsiella pneumoniae	sputum	Homo sapiens	chromosome	South Korea	307	GCA_003597715.1_ASM359771v1_genomic.gbff
Klebsiella pneumoniae	sputum	Homo sapiens	chromosome	South Korea	307	GCA_003597735.1_ASM359773v1_genomic.gbff
Klebsiella pneumoniae	sputum	Homo sapiens	chromosome	South Korea	307	GCA_003597755.1_ASM359775v1_genomic.gbff
Klebsiella pneumoniae	0	Homo sapiens	chromosome	China	11	GCA_003711065.1_ASM371106v1_genomic.gbff
Klebsiella pneumoniae	rectal swab	Homo sapiens	chromosome	Italy	1685	GCA_003790485.1_ASM379048v1_genomic.gbff
Klebsiella pneumoniae	Blood	Homo sapiens	chromosome	Norway	15	GCA_003855315.1_ASM385531v1_genomic.gbff
Klebsiella pneumoniae	Blood	Homo sapiens	chromosome	Norway	15	GCA_003855335.1_ASM385533v1_genomic.gbff
Klebsiella pneumoniae	blood	Homo sapiens	chromosome	China	15	GCA_003855535.1_ASM385553v1_genomic.gbff
Klebsiella pneumoniae	sputum	Homo sapiens	chromosome	China	15	GCA_003855555.1_ASM385555v1_genomic.gbff
Klebsiella pneumoniae	respiratory tract	Homo sapiens	chromosome	China	11	GCA_003856475.1_ASM385647v1_genomic.gbff
Klebsiella pneumoniae	feces	Homo sapiens	chromosome	Sweden	147	GCA_003856595.1_ASM385659v1_genomic.gbff
Klebsiella pneumoniae subsp. pneumoniae	blood	Homo sapiens	chromosome	United Kingdom	383	GCA_003860645.2_ASM386064v2_genomic.gbff
Klebsiella pneumoniae	urine	male	chromosome	China	11	GCA_003931835.1_ASM393183v1_genomic.gbff
Klebsiella pneumoniae	blood	Homo sapiens	chromosome	China	65	GCA_003932915.1_ASM393291v1_genomic.gbff
Klebsiella pneumoniae	0	Homo sapiens	chromosome	China	23	GCA_003953905.1_ASM395390v1_genomic.gbff
Klebsiella pneumoniae	blood	Homo sapiens	chromosome	China	437	GCA_004006035.1_ASM400603v1_genomic.gbff
Klebsiella pneumoniae	0	Homo sapiens	chromosome	Sweden	101	GCA_004010995.1_ASM401099v1_genomic.gbff
Klebsiella pneumoniae	sputum	Homo sapiens	chromosome	China	11	GCA_004119955.1_ASM411995v1_genomic.gbff
Klebsiella pneumoniae	bile	Homo sapiens	chromosome	China	11	GCA_004119975.1_ASM411997v1_genomic.gbff
Klebsiella pneumoniae	ascites	Homo sapiens	chromosome	China	11	GCA_004119995.1_ASM411999v1_genomic.gbff
Klebsiella pneumoniae	sputum	Homo sapiens	chromosome	China	37	GCA_004120015.1_ASM412001v1_genomic.gbff
Klebsiella pneumoniae	sputum	Homo sapiens	chromosome	China	343	GCA_004120035.1_ASM412003v1_genomic.gbff
Klebsiella pneumoniae	urine	Homo sapiens	chromosome	China	661	GCA_004120055.1_ASM412005v1_genomic.gbff
Klebsiella pneumoniae	end of the catheter	Homo sapiens	chromosome	China	-	GCA_004120075.1_ASM412007v1_genomic.gbff
Klebsiella pneumoniae	blood	Homo sapiens	chromosome	China	11	GCA_004120095.1_ASM412009v1_genomic.gbff
Klebsiella pneumoniae	sputum	Homo sapiens	chromosome	China	11	GCA_004120115.1_ASM412011v1_genomic.gbff
Klebsiella pneumoniae	sputum	Homo sapiens	chromosome	China	-	GCA_004120135.1_ASM412013v1_genomic.gbff
Klebsiella pneumoniae	incision secretion	Homo sapiens	chromosome	China	-	GCA_004120155.1_ASM412015v1_genomic.gbff
Klebsiella pneumoniae	sputum	Homo sapiens	chromosome	China	17	GCA_004120175.1_ASM412017v1_genomic.gbff
Klebsiella pneumoniae	sputum	Homo sapiens	chromosome	Thailand	14	GCA_004135795.1_ASM413579v1_genomic.gbff
Klebsiella pneumoniae subsp. pneumoniae	anal sample	Homo sapiens	chromosome	Canada	11	GCA_004141975.1_ASM414197v1_genomic.gbff
Klebsiella pneumoniae	blood	Homo sapiens	chromosome	India	23	GCA_004209795.1_ASM420979v1_genomic.gbff
Klebsiella pneumoniae	blood	Homo sapiens	chromosome	India	15	GCA_004295385.1_ASM429538v1_genomic.gbff
Klebsiella pneumoniae	blood	Homo sapiens	chromosome	India	23	GCA_004295405.1_ASM429540v1_genomic.gbff
Klebsiella pneumoniae	blood	Homo sapiens	chromosome	India	15	GCA_004319525.1_ASM431952v1_genomic.gbff
Klebsiella pneumoniae	0	Homo sapiens	chromosome	China	11	GCA_004322795.1_ASM432279v1_genomic.gbff
Klebsiella pneumoniae	rectal swab	Homo sapiens	chromosome	Canada	86	GCA_004332075.1_ASM433207v1_genomic.gbff
Klebsiella pneumoniae	blood	Homo sapiens	chromosome	China	2570	GCA_004801235.1_ASM480123v1_genomic.gbff
Klebsiella pneumoniae	urine	Homo sapiens	chromosome	USA	23	GCA_004924315.1_ASM492431v1_genomic.gbff
Klebsiella pneumoniae	blood	Homo sapiens	chromosome	India	11	GCA_005347525.1_ASM534752v1_genomic.gbff
Klebsiella pneumoniae	0	Homo sapiens	chromosome	China	-	GCA_005377825.1_ASM537782v1_genomic.gbff
Klebsiella pneumoniae	blood	Homo sapiens	chromosome	China	11	GCA_005853785.1_ASM585378v1_genomic.gbff
Klebsiella pneumoniae	blood	Homo sapiens	chromosome	China	11	GCA_005854025.1_ASM585402v1_genomic.gbff
Klebsiella pneumoniae	blood	Homo sapiens	chromosome	China	11	GCA_005854245.1_ASM585424v1_genomic.gbff
Klebsiella pneumoniae subsp. pneumoniae	throat	Homo sapiens	chromosome	United Kingdom	15	GCA_005885775.1_ASM588577v1_genomic.gbff
Klebsiella pneumoniae	rectal swab	Homo sapiens	chromosome	United Kingdom	147	GCA_005944305.1_ASM594430v1_genomic.gbff
Klebsiella pneumoniae	urine	Homo sapiens	chromosome	China	11	GCA_006304565.1_ASM630456v1_genomic.gbff
Klebsiella pneumoniae	stool	Homo sapiens	chromosome	China	11	GCA_006494895.1_ASM649489v1_genomic.gbff
Klebsiella pneumoniae	stool	Homo sapiens	chromosome	China	11	GCA_006494915.1_ASM649491v1_genomic.gbff
Klebsiella pneumoniae	blood	Homo sapiens	chromosome	China	35	GCA_006965405.3_ASM696540v3_genomic.gbff
Klebsiella pneumoniae	gut	Homo sapiens	chromosome	China	1779	GCA_007197815.1_ASM719781v1_genomic.gbff
Klebsiella pneumoniae	urine	Homo sapiens	chromosome	USA	14	GCA_007833575.1_ASM783357v1_genomic.gbff
Klebsiella pneumoniae	0	Homo sapiens	chromosome	Viet Nam	16	GCA_007873865.1_ASM787386v1_genomic.gbff
Klebsiella pneumoniae	SHIME feed	Homo sapiens	chromosome	China	22	GCA_007999005.1_ASM799900v1_genomic.gbff
Klebsiella pneumoniae	0	Homo sapiens	chromosome	South Korea	16	GCA_008065415.1_ASM806541v1_genomic.gbff
Klebsiella pneumoniae	0	Homo sapiens	chromosome	USA	258	GCA_008121515.1_ASM812151v1_genomic.gbff
Klebsiella pneumoniae	sputum	Homo sapiens	chromosome	Taiwan	-	GCA_008122285.1_ASM812228v1_genomic.gbff
Klebsiella pneumoniae	sputum	Homo sapiens	chromosome	Taiwan	268	GCA_008122305.1_ASM812230v1_genomic.gbff
Klebsiella pneumoniae	sputum	Homo sapiens	chromosome	China	-	GCA_008386255.1_ASM838625v1_genomic.gbff
Klebsiella pneumoniae	sputum	Homo sapiens	chromosome	China	-	GCA_008386275.1_ASM838627v1_genomic.gbff
Klebsiella pneumoniae	clinical isolate	Homo sapiens	chromosome	USA	147	GCA_008693405.1_ASM869340v1_genomic.gbff
Klebsiella pneumoniae	clinical isolate	Homo sapiens	chromosome	USA	-	GCA_008693425.1_ASM869342v1_genomic.gbff
Klebsiella pneumoniae	clinical isolate	Homo sapiens	chromosome	USA	231	GCA_008693445.1_ASM869344v1_genomic.gbff
Klebsiella pneumoniae	urine	Homo sapiens	chromosome	China	11	GCA_008728415.1_ASM872841v1_genomic.gbff
Klebsiella pneumoniae	urine	Homo sapiens	chromosome	China	11	GCA_008728695.1_ASM872869v1_genomic.gbff
Klebsiella pneumoniae	clinical sample	Homo sapiens	chromosome	Australia	12	GCA_008931345.1_ASM893134v1_genomic.gbff
Klebsiella pneumoniae	clinical sample	Homo sapiens	chromosome	Australia	1109	GCA_008931565.1_ASM893156v1_genomic.gbff
Klebsiella pneumoniae	stool	Homo sapiens	chromosome	Laos	39	GCA_009387775.1_ASM938777v1_genomic.gbff
Klebsiella pneumoniae	stool	Homo sapiens	chromosome	Thailand	873	GCA_009387815.1_ASM938781v1_genomic.gbff
Klebsiella pneumoniae	stool	Homo sapiens	chromosome	Laos	1315	GCA_009387915.1_ASM938791v1_genomic.gbff
Klebsiella pneumoniae	stool	Homo sapiens	chromosome	Laos	87	GCA_009387945.1_ASM938794v1_genomic.gbff
Klebsiella pneumoniae	0	Homo sapiens	chromosome	China	23	GCA_009497695.1_ASM949769v1_genomic.gbff
Klebsiella pneumoniae	0	Homo sapiens	chromosome	China	392	GCA_009497735.1_ASM949773v1_genomic.gbff
Klebsiella pneumoniae	0	Homo sapiens	chromosome	China	1265	GCA_009497755.1_ASM949775v1_genomic.gbff
Klebsiella pneumoniae	[]	Homo sapiens	chromosome	Japan	25	GCA_009556655.1_ASM955665v1_genomic.gbff
Klebsiella pneumoniae	blood	Homo sapiens	chromosome	USA	-	GCA_009601745.1_ASM960174v1_genomic.gbff
Klebsiella pneumoniae	urine	Homo sapiens	chromosome	USA	16	GCA_009720445.1_ASM972044v1_genomic.gbff
Klebsiella pneumoniae	human sputum	Homo sapiens	chromosome	Nepal	147	GCA_009731405.1_ASM973140v1_genomic.gbff
Klebsiella pneumoniae	0	Homo sapiens	chromosome	Bangladesh	15	GCA_009734105.1_ASM973410v1_genomic.gbff
Klebsiella pneumoniae	0	Homo sapiens	chromosome	Taiwan	-	GCA_009740025.1_ASM974002v1_genomic.gbff
Klebsiella pneumoniae	0	Homo sapiens	chromosome	Taiwan	-	GCA_009740045.1_ASM974004v1_genomic.gbff
Klebsiella pneumoniae	0	Homo sapiens	chromosome	Taiwan	-	GCA_009740065.1_ASM974006v1_genomic.gbff
Klebsiella pneumoniae	0	Homo sapiens	chromosome	Taiwan	-	GCA_009740085.1_ASM974008v1_genomic.gbff
Klebsiella pneumoniae	0	Homo sapiens	chromosome	Taiwan	-	GCA_009740225.1_ASM974022v1_genomic.gbff
Klebsiella pneumoniae	0	Homo sapiens	chromosome	Taiwan	-	GCA_009740245.1_ASM974024v1_genomic.gbff
Klebsiella pneumoniae	0	Homo sapiens	chromosome	Bangladesh	15	GCA_009791475.1_ASM979147v1_genomic.gbff
Klebsiella pneumoniae	0	Homo sapiens	chromosome	Bangladesh	15	GCA_009791495.1_ASM979149v1_genomic.gbff
Klebsiella pneumoniae	blood	female	chromosome	China	11	GCA_009833945.1_ASM983394v1_genomic.gbff
Klebsiella pneumoniae	blood	Homo sapiens	chromosome	China	11	GCA_009834285.1_ASM983428v1_genomic.gbff
Klebsiella pneumoniae	0	Homo sapiens	chromosome	China	11	GCA_009856585.1_ASM985658v1_genomic.gbff

## Sheet: Sheet2
organism	isolation_source	host	assembly level	country	mlst	head
Klebsiella pneumoniae subsp. pneumoniae KPNIH1	groin	Homo sapiens	chromosome	USA	258	GCA_000281535.2_ASM28153v2_genomic.gbff
Klebsiella pneumoniae subsp. pneumoniae Kp13	blood	Homo sapiens	chromosome	Brazil	442	GCA_000512165.1_ASM51216v1_genomic.gbff
Klebsiella pneumoniae 30684/NJST258_2	urinary tract infection	Homo sapiens	chromosome	USA	258	GCA_000597905.1_ASM59790v1_genomic.gbff
Klebsiella pneumoniae 30660/NJST258_1	urinary tract infection	Homo sapiens	chromosome	USA	258	GCA_000598005.1_ASM59800v1_genomic.gbff
Klebsiella pneumoniae	miss	Homo sapiens	chromosome	Nepal	15	GCA_000764615.1_ASM76461v1_genomic.gbff
Klebsiella pneumoniae subsp. pneumoniae	urine	Homo sapiens	chromosome	USA	258	GCA_000775375.1_ASM77537v1_genomic.gbff
Klebsiella pneumoniae subsp. pneumoniae	perirectal swab	Homo sapiens	chromosome	USA	1518	GCA_000784945.1_ASM78494v1_genomic.gbff
Klebsiella pneumoniae subsp. pneumoniae	perirectal swab	Homo sapiens	chromosome	USA	258	GCA_000784985.1_ASM78498v1_genomic.gbff
Klebsiella pneumoniae subsp. pneumoniae	urine	Homo sapiens	chromosome	USA	392	GCA_000785005.1_ASM78500v1_genomic.gbff
Klebsiella pneumoniae	Excreted bodily substance	Homo sapiens	chromosome	USA	258	GCA_000807395.3_ASM80739v3_genomic.gbff
Klebsiella pneumoniae	Bodily fluid	Homo sapiens	chromosome	USA	258	GCA_000814305.1_ASM81430v1_genomic.gbff
Klebsiella pneumoniae subsp. pneumoniae 1158	miss	Homo sapiens	chromosome	Taiwan	65	GCA_000814805.1_ASM81480v1_genomic.gbff
Klebsiella pneumoniae subsp. pneumoniae	miss	Homo sapiens	chromosome	Germany	514	GCA_000981845.1_ASM98184v1_genomic.gbff
Klebsiella pneumoniae	Sputum	Homo sapiens	chromosome	USA	11	GCA_001022035.1_ASM102203v1_genomic.gbff
Klebsiella pneumoniae	Urine	Homo sapiens	chromosome	USA	941	GCA_001022175.1_ASM102217v1_genomic.gbff
Klebsiella pneumoniae	Perirectal	Homo sapiens	chromosome	USA	258	GCA_001022235.1_ASM102223v1_genomic.gbff
Klebsiella pneumoniae subsp. pneumoniae	miss	Homo sapiens	chromosome	South Africa	101	GCA_001316565.3_ASM131656v3_genomic.gbff
Klebsiella pneumoniae	urine	Homo sapiens	chromosome	United Arab Emirates	147	GCA_001455995.1_MS6671.v1_genomic.gbff
Klebsiella pneumoniae	urine	Homo sapiens	chromosome	Canada	278	GCA_001456055.3_ASM145605v3_genomic.gbff
Klebsiella pneumoniae	blood	Homo sapiens	chromosome	Canada	278	GCA_001456095.3_ASM145609v3_genomic.gbff
Klebsiella pneumoniae	Respiratory	Homo sapiens	chromosome	USA	941	GCA_001456135.1_ASM145613v1_genomic.gbff
Klebsiella pneumoniae subsp. pneumoniae	urine	Homo sapiens	chromosome	China	14	GCA_001521895.1_ASM152189v1_genomic.gbff
Klebsiella pneumoniae subsp. pneumoniae	blood	Homo sapiens	chromosome	China	23	GCA_001529935.1_ASM152993v1_genomic.gbff
Klebsiella pneumoniae subsp. pneumoniae	blood	Homo sapiens	chromosome	China	374	GCA_001530015.1_ASM153001v1_genomic.gbff
Klebsiella pneumoniae subsp. pneumoniae	CVC	Homo sapiens	chromosome	Greece	383	GCA_001611055.1_ASM161105v1_genomic.gbff
Klebsiella pneumoniae subsp. pneumoniae	wound swab	Homo sapiens	chromosome	Greece	383	GCA_001611095.1_ASM161109v1_genomic.gbff
Klebsiella pneumoniae	Urine sample	Homo sapiens	chromosome	United Arab Emirates	147	GCA_001644765.1_ASM164476v1_genomic.gbff
Klebsiella pneumoniae	fecal sample	Homo sapiens	chromosome	China	1536	GCA_001646625.1_ASM164662v1_genomic.gbff
Klebsiella pneumoniae	miss	Homo sapiens	chromosome	USA	147	GCA_001648215.1_ASM164821v1_genomic.gbff
Klebsiella pneumoniae	miss	Homo sapiens	chromosome	China	15	GCA_001663195.1_ASM166319v1_genomic.gbff
Klebsiella pneumoniae	miss	Homo sapiens	chromosome	USA	37	GCA_001663295.1_ASM166329v1_genomic.gbff
Klebsiella pneumoniae	miss	Homo sapiens	chromosome	USA	273	GCA_001663435.1_ASM166343v1_genomic.gbff
Klebsiella pneumoniae	miss	Homo sapiens	chromosome	USA	2623	GCA_001663455.1_ASM166345v1_genomic.gbff
Klebsiella pneumoniae	miss	Homo sapiens	chromosome	USA	258	GCA_001675125.1_ASM167512v1_genomic.gbff
Klebsiella pneumoniae	Stool	Homo sapiens	chromosome	Greece	147	GCA_001701425.2_ASM170142v2_genomic.gbff
Klebsiella pneumoniae	Stool	Homo sapiens	chromosome	Greece	11	GCA_001701835.2_ASM170183v2_genomic.gbff
Klebsiella pneumoniae	Stool	Homo sapiens	chromosome	Greece	258	GCA_001701845.2_ASM170184v2_genomic.gbff
Klebsiella pneumoniae	Urine	Homo sapiens	chromosome	Greece	258	GCA_001702045.2_ASM170204v2_genomic.gbff
Klebsiella pneumoniae	Urine	Homo sapiens	chromosome	USA	34	GCA_001704235.1_ASM170423v1_genomic.gbff
Klebsiella pneumoniae	blood	Homo sapiens	chromosome	Switzerland	512	GCA_001705385.1_ASM170538v1_genomic.gbff
Klebsiella pneumoniae	blood	Homo sapiens	chromosome	Taiwan	23	GCA_001708225.1_ASM170822v1_genomic.gbff
Klebsiella pneumoniae	blood	Homo sapiens	chromosome	Taiwan	23	GCA_001708245.1_ASM170824v1_genomic.gbff
Klebsiella pneumoniae	Urine	Homo sapiens	chromosome	USA	14	GCA_001709275.1_ASM170927v1_genomic.gbff
Klebsiella pneumoniae	Tracheal Aspirate	Homo sapiens	chromosome	USA	14	GCA_001709295.1_ASM170929v1_genomic.gbff
Klebsiella pneumoniae	Respiratory	Homo sapiens	chromosome	USA	16	GCA_001721725.1_ASM172172v1_genomic.gbff
Klebsiella pneumoniae	Rectal	Homo sapiens	chromosome	USA	16	GCA_001741545.1_ASM174154v1_genomic.gbff
Klebsiella pneumoniae	abdominal drainage	Homo sapiens	chromosome	USA	16	GCA_001741665.1_ASM174166v1_genomic.gbff
Klebsiella pneumoniae subsp. pneumoniae	rectal	Homo sapiens	chromosome	Greece	147	GCA_001746535.1_ASM174653v1_genomic.gbff
Klebsiella pneumoniae	urine	Homo sapiens	chromosome	Taiwan	15	GCA_001750805.1_ASM175080v1_genomic.gbff
Klebsiella pneumoniae	Hospital	Homo sapiens	chromosome	Singapore	147	GCA_001855315.1_ASM185531v1_genomic.gbff
Klebsiella pneumoniae	Abdominal Abscess	Homo sapiens	chromosome	USA	45	GCA_001870165.1_ASM187016v1_genomic.gbff
Klebsiella pneumoniae	nose	Homo sapiens	chromosome	Germany	147	GCA_001885255.2_ASM188525v2_genomic.gbff
Klebsiella pneumoniae	sputum	Homo sapiens	chromosome	China	1	GCA_001887995.2_ASM188799v2_genomic.gbff
Klebsiella pneumoniae	Wound	Homo sapiens	chromosome	USA	258	GCA_001902195.1_ASM190219v1_genomic.gbff
Klebsiella pneumoniae	Urine	Homo sapiens	chromosome	USA	258	GCA_001902215.1_ASM190221v1_genomic.gbff
Klebsiella pneumoniae	Wound	Homo sapiens	chromosome	USA	258	GCA_001902235.1_ASM190223v1_genomic.gbff
Klebsiella pneumoniae	Perirectal	Homo sapiens	chromosome	USA	258	GCA_001902255.1_ASM190225v1_genomic.gbff
Klebsiella pneumoniae	wound swab	Homo sapiens	chromosome	Germany	23	GCA_001902335.1_ASM190233v1_genomic.gbff
Klebsiella pneumoniae	urine	Homo sapiens	chromosome	Germany	395	GCA_001902355.1_ASM190235v1_genomic.gbff
Klebsiella pneumoniae	tracheal secretion	Homo sapiens	chromosome	Germany	15	GCA_001902395.1_ASM190239v1_genomic.gbff
Klebsiella pneumoniae	skin swab	Homo sapiens	chromosome	Germany	11	GCA_001902415.1_ASM190241v1_genomic.gbff
Klebsiella pneumoniae	wound swab	Homo sapiens	chromosome	Germany	101	GCA_001902435.1_ASM190243v1_genomic.gbff
Klebsiella pneumoniae	urine sample	Homo sapiens	chromosome	Germany	101	GCA_001902515.1_ASM190251v1_genomic.gbff
Klebsiella pneumoniae	Urine/Genitourinary	Homo sapiens	chromosome	USA	340	GCA_001902535.1_ASM190253v1_genomic.gbff
Klebsiella pneumoniae	Urine	Homo sapiens	chromosome	USA	244	GCA_001908515.1_ASM190851v1_genomic.gbff
Klebsiella pneumoniae	tracheal secretion	Homo sapiens	chromosome	Germany	147	GCA_001908595.1_ASM190859v1_genomic.gbff
Klebsiella pneumoniae	abdominal drainage fluid	Homo sapiens	chromosome	Germany	147	GCA_001908625.1_ASM190862v1_genomic.gbff
Klebsiella pneumoniae	nasal swab	Homo sapiens	chromosome	Germany	147	GCA_001908655.1_ASM190865v1_genomic.gbff
Klebsiella pneumoniae	abdominal drainage fluid	Homo sapiens	chromosome	Germany	147	GCA_001908675.1_ASM190867v1_genomic.gbff
Klebsiella pneumoniae	anal swab	Homo sapiens	chromosome	Germany	147	GCA_001908695.1_ASM190869v1_genomic.gbff
Klebsiella pneumoniae	Urine	Homo sapiens	chromosome	USA	340	GCA_001908715.1_ASM190871v1_genomic.gbff
Klebsiella pneumoniae	abdominal drain fluid	Homo sapiens	chromosome	Germany	147	GCA_001908875.1_ASM190887v1_genomic.gbff
Klebsiella pneumoniae	anal swab	Homo sapiens	chromosome	Germany	11	GCA_001908895.1_ASM190889v1_genomic.gbff
Klebsiella pneumoniae	urine sample	Homo sapiens	chromosome	Germany	101	GCA_001913175.1_ASM191317v1_genomic.gbff
Klebsiella pneumoniae	pus	Homo sapiens	chromosome	Taiwan	2549	GCA_001952835.1_ASM195283v1_genomic.gbff
Klebsiella pneumoniae	miss	Homo sapiens	chromosome	USA	392	GCA_001952875.1_ASM195287v1_genomic.gbff
Klebsiella pneumoniae	miss	Homo sapiens	chromosome	USA	340	GCA_001952895.1_ASM195289v1_genomic.gbff
Klebsiella pneumoniae	miss	Homo sapiens	chromosome	USA	258	GCA_001952915.1_ASM195291v1_genomic.gbff
Klebsiella pneumoniae	anal swab	Homo sapiens	chromosome	Germany	147	GCA_001956965.1_ASM195696v1_genomic.gbff
Klebsiella pneumoniae	Urine	Homo sapiens	chromosome	Norway	11	GCA_002113865.1_ASM211386v1_genomic.gbff
Klebsiella pneumoniae	miss	Homo sapiens	chromosome	USA	86	GCA_002116885.1_ASM211688v1_genomic.gbff
Klebsiella pneumoniae	miss	Homo sapiens	chromosome	USA	258	GCA_002156725.1_ASM215672v1_genomic.gbff
Klebsiella pneumoniae	respiratory	Homo sapiens	chromosome	USA	37	GCA_002156745.1_ASM215674v1_genomic.gbff
Klebsiella pneumoniae	respiratory	Homo sapiens	chromosome	USA	14	GCA_002156785.1_ASM215678v1_genomic.gbff
Klebsiella pneumoniae subsp. pneumoniae	sputum	Homo sapiens	chromosome	China	23	GCA_002163895.1_ASM216389v1_genomic.gbff
Klebsiella pneumoniae	miss	Homo sapiens	chromosome	China	11	GCA_002164855.2_ASM216485v2_genomic.gbff
Klebsiella pneumoniae	wound	Homo sapiens	chromosome	USA	15	GCA_002211905.1_ASM221190v1_genomic.gbff
Klebsiella pneumoniae	miss	Homo sapiens	chromosome	France	258	GCA_002243445.1_ASM224344v1_genomic.gbff
Klebsiella pneumoniae subsp. pneumoniae	Patient urine	Homo sapiens	chromosome	Australia	258	GCA_002249975.3_ASM224997v3_genomic.gbff
Klebsiella pneumoniae	miss	Homo sapiens	chromosome	China	11	GCA_002257765.2_ASM225776v2_genomic.gbff
Klebsiella pneumoniae	urine	Homo sapiens	chromosome	China	11	GCA_002269295.1_ASM226929v1_genomic.gbff
Klebsiella pneumoniae	urine	Homo sapiens	chromosome	China	11	GCA_002278055.1_ASM227805v1_genomic.gbff
Klebsiella pneumoniae	blood	Homo sapiens	chromosome	India	231	GCA_002300675.2_ASM230067v2_genomic.gbff
Klebsiella pneumoniae	Wound	Homo sapiens	chromosome	Canada	11	GCA_002587165.1_ASM258716v1_genomic.gbff
Klebsiella pneumoniae	Rectal	Homo sapiens	chromosome	Canada	340	GCA_002587885.1_ASM258788v1_genomic.gbff
Klebsiella pneumoniae	Urine	Homo sapiens	chromosome	Canada	147	GCA_002591075.1_ASM259107v1_genomic.gbff
Klebsiella pneumoniae	blood	Homo sapiens	chromosome	India	101	GCA_002740955.2_ASM274095v2_genomic.gbff
Klebsiella pneumoniae	rectal swab	Homo sapiens	chromosome	Australia	340	GCA_002741685.1_ASM274168v1_genomic.gbff
Klebsiella pneumoniae	sputum	Homo sapiens	chromosome	Thailand	45	GCA_002752955.1_ASM275295v1_genomic.gbff
Klebsiella pneumoniae	Sputum	Homo sapiens	chromosome	China	23	GCA_002761315.1_ASM276131v1_genomic.gbff
Klebsiella pneumoniae subsp. pneumoniae	["separated from patient's sputum"]	Homo sapiens	chromosome	China	659	GCA_002761515.1_ASM276151v1_genomic.gbff
Klebsiella pneumoniae	Bronchial washing	Homo sapiens	chromosome	South Korea	147	GCA_002786755.1_ASM278675v1_genomic.gbff
Klebsiella pneumoniae	Peritoneal fluid	Homo sapiens	chromosome	South Korea	147	GCA_002787755.1_ASM278775v1_genomic.gbff
Klebsiella pneumoniae	miss	Homo sapiens	chromosome	China	11	GCA_002811305.2_ASM281130v2_genomic.gbff
Klebsiella pneumoniae	miss	Homo sapiens	chromosome	China	273	GCA_002811335.4_ASM281133v4_genomic.gbff
Klebsiella pneumoniae	Sacral swab	Homo sapiens	chromosome	Australia	258	GCA_002812365.1_ASM281236v1_genomic.gbff
Klebsiella pneumoniae	urine	Homo sapiens	chromosome	Australia	258	GCA_002812385.1_ASM281238v1_genomic.gbff
Klebsiella pneumoniae	urine	Homo sapiens	chromosome	USA	258	GCA_002812665.1_ASM281266v1_genomic.gbff
Klebsiella pneumoniae	liver abscess	Homo sapiens	chromosome	Singapore	23	GCA_002813595.1_ASM281359v1_genomic.gbff
Klebsiella pneumoniae	Sputum	Homo sapiens	chromosome	China	37	GCA_002814015.1_ASM281401v1_genomic.gbff
Klebsiella pneumoniae	bronchoalveolar lavage	Homo sapiens	chromosome	USA	307	GCA_002833425.1_ASM283342v1_genomic.gbff
Klebsiella pneumoniae	Pancreatic Fluid	Homo sapiens	chromosome	USA	307	GCA_002833445.1_ASM283344v1_genomic.gbff
Klebsiella pneumoniae	blood	Homo sapiens	chromosome	USA	307	GCA_002833465.1_ASM283346v1_genomic.gbff
Klebsiella pneumoniae	miss	Homo sapiens	chromosome	China	11	GCA_002848545.1_ASM284854v1_genomic.gbff
Klebsiella pneumoniae	miss	Homo sapiens	chromosome	China	11	GCA_002848565.1_ASM284856v1_genomic.gbff
Klebsiella pneumoniae	miss	Homo sapiens	chromosome	China	11	GCA_002848585.1_ASM284858v1_genomic.gbff
Klebsiella pneumoniae subsp. pneumoniae	miss	Homo sapiens	chromosome	China	11	GCA_002852365.2_ASM285236v2_genomic.gbff
Klebsiella pneumoniae	pus	Homo sapiens	chromosome	China	1	GCA_002852995.3_ASM285299v3_genomic.gbff
Klebsiella pneumoniae	miss	Homo sapiens	chromosome	China	1	GCA_002853475.2_ASM285347v2_genomic.gbff
Klebsiella pneumoniae subsp. pneumoniae	miss	Homo sapiens	chromosome	China	11	GCA_002893825.1_ASM289382v1_genomic.gbff
Klebsiella pneumoniae	blood	Homo sapiens	chromosome	India	231	GCA_002909775.2_ASM290977v2_genomic.gbff
Klebsiella pneumoniae	miss	Homo sapiens	chromosome	China	86	GCA_002944845.1_ASM294484v1_genomic.gbff
Klebsiella pneumoniae subsp. pneumoniae	blood	Homo sapiens	chromosome	Brazil	437	GCA_002951555.1_ASM295155v1_genomic.gbff
Klebsiella pneumoniae subsp. pneumoniae	urine	Homo sapiens	chromosome	Brazil	437	GCA_002951595.1_ASM295159v1_genomic.gbff
Klebsiella pneumoniae	Urine	Homo sapiens	chromosome	USA	13	GCA_002951635.1_ASM295163v1_genomic.gbff
Klebsiella pneumoniae	blie	Homo sapiens	chromosome	China	34	GCA_002966875.1_ASM296687v1_genomic.gbff
Klebsiella pneumoniae subsp. pneumoniae	miscellaneous body fluid	Homo sapiens	chromosome	USA	395	GCA_002970375.3_ASM297037v3_genomic.gbff
Klebsiella pneumoniae	wound	Homo sapiens	chromosome	China	23	GCA_002970895.1_ASM297089v1_genomic.gbff
Klebsiella pneumoniae	Trachaeal secretion	Homo sapiens	chromosome	Pakistan	147	GCA_003006175.1_ASM300617v1_genomic.gbff
Klebsiella pneumoniae	human	Homo sapiens	chromosome	Denmark	512	GCA_003030045.1_ASM303004v1_genomic.gbff
Klebsiella pneumoniae	human	Homo sapiens	chromosome	Germany	15	GCA_003030145.1_ASM303014v1_genomic.gbff
Klebsiella pneumoniae	sputum	Homo sapiens	chromosome	Thailand	15	GCA_003031325.1_ASM303132v1_genomic.gbff
Klebsiella pneumoniae	rectal swab	Homo sapiens	chromosome	Thailand	147	GCA_003031345.1_ASM303134v1_genomic.gbff
Klebsiella pneumoniae	urine	Homo sapiens	chromosome	USA	258	GCA_003031505.1_ASM303150v1_genomic.gbff
Klebsiella pneumoniae	miss	Homo sapiens	chromosome	China	11	GCA_003037005.2_ASM303700v2_genomic.gbff
Klebsiella pneumoniae subsp. pneumoniae	miss	Homo sapiens	chromosome	China	48	GCA_003037615.2_ASM303761v2_genomic.gbff
Klebsiella pneumoniae	miss	Homo sapiens	chromosome	Thailand	16	GCA_003073235.1_ASM307323v1_genomic.gbff
Klebsiella pneumoniae	urine	Homo sapiens	chromosome	Iran	307	GCA_003076555.1_ASM307655v1_genomic.gbff
Klebsiella pneumoniae	miss	Homo sapiens	chromosome	Sweden	147	GCA_003181055.1_ASM318105v1_genomic.gbff
Klebsiella pneumoniae	miss	Homo sapiens	chromosome	Sweden	16	GCA_003181095.1_ASM318109v1_genomic.gbff
Klebsiella pneumoniae	miss	Homo sapiens	chromosome	Sweden	16	GCA_003181135.1_ASM318113v1_genomic.gbff
Klebsiella pneumoniae	urine	Homo sapiens	chromosome	USA	983	GCA_003186535.1_ASM318653v1_genomic.gbff
Klebsiella pneumoniae	urine	Homo sapiens	chromosome	Sweden	147	GCA_003194285.1_ASM319428v1_genomic.gbff
Klebsiella pneumoniae	miss	Homo sapiens	chromosome	China	11	GCA_003261955.2_ASM326195v2_genomic.gbff
Klebsiella pneumoniae subsp. pneumoniae	miss	Homo sapiens	chromosome	China	1755	GCA_003285145.1_ASM328514v1_genomic.gbff
Klebsiella pneumoniae subsp. pneumoniae	miss	Homo sapiens	chromosome	China	29	GCA_003286975.1_ASM328697v1_genomic.gbff
Klebsiella pneumoniae subsp. pneumoniae	miss	Homo sapiens	chromosome	China	1660	GCA_003286995.1_ASM328699v1_genomic.gbff
Klebsiella pneumoniae	blood	Homo sapiens	chromosome	United Kingdom	101	GCA_003363735.2_ASM336373v2_genomic.gbff
Klebsiella pneumoniae	urine	Homo sapiens	chromosome	China	11	GCA_003367555.1_ASM336755v1_genomic.gbff
Klebsiella pneumoniae subsp. pneumoniae	blood	Homo sapiens	chromosome	South Korea	14	GCA_003428845.1_ASM342884v1_genomic.gbff
Klebsiella pneumoniae	blood	Homo sapiens	chromosome	China	719	GCA_003429065.3_ASM342906v3_genomic.gbff
Klebsiella pneumoniae	urine	Homo sapiens	chromosome	Taiwan	11	GCA_003429545.1_ASM342954v1_genomic.gbff
Klebsiella pneumoniae	hospital	Homo sapiens	chromosome	Spain	54	GCA_003443755.1_ASM344375v1_genomic.gbff
Klebsiella pneumoniae	miss	Homo sapiens	chromosome	Thailand	14	GCA_003574235.1_ASM357423v1_genomic.gbff
Klebsiella pneumoniae	miss	Homo sapiens	chromosome	Thailand	14	GCA_003574255.1_ASM357425v1_genomic.gbff
Klebsiella pneumoniae	miss	Homo sapiens	chromosome	Thailand	14	GCA_003574275.1_ASM357427v1_genomic.gbff
Klebsiella pneumoniae	Rectal swab	Homo sapiens	chromosome	South Korea	307	GCA_003597695.1_ASM359769v1_genomic.gbff
Klebsiella pneumoniae	sputum	Homo sapiens	chromosome	South Korea	307	GCA_003597715.1_ASM359771v1_genomic.gbff
Klebsiella pneumoniae	sputum	Homo sapiens	chromosome	South Korea	307	GCA_003597735.1_ASM359773v1_genomic.gbff
Klebsiella pneumoniae	sputum	Homo sapiens	chromosome	South Korea	307	GCA_003597755.1_ASM359775v1_genomic.gbff
Klebsiella pneumoniae	miss	Homo sapiens	chromosome	China	11	GCA_003711065.1_ASM371106v1_genomic.gbff
Klebsiella pneumoniae	rectal swab	Homo sapiens	chromosome	Italy	1685	GCA_003790485.1_ASM379048v1_genomic.gbff
Klebsiella pneumoniae	Blood	Homo sapiens	chromosome	Norway	15	GCA_003855315.1_ASM385531v1_genomic.gbff
Klebsiella pneumoniae	Blood	Homo sapiens	chromosome	Norway	15	GCA_003855335.1_ASM385533v1_genomic.gbff
Klebsiella pneumoniae	blood	Homo sapiens	chromosome	China	15	GCA_003855535.1_ASM385553v1_genomic.gbff
Klebsiella pneumoniae	sputum	Homo sapiens	chromosome	China	15	GCA_003855555.1_ASM385555v1_genomic.gbff
Klebsiella pneumoniae	respiratory tract	Homo sapiens	chromosome	China	11	GCA_003856475.1_ASM385647v1_genomic.gbff
Klebsiella pneumoniae	feces	Homo sapiens	chromosome	Sweden	147	GCA_003856595.1_ASM385659v1_genomic.gbff
Klebsiella pneumoniae subsp. pneumoniae	blood	Homo sapiens	chromosome	United Kingdom	383	GCA_003860645.2_ASM386064v2_genomic.gbff
Klebsiella pneumoniae	urine	male	chromosome	China	11	GCA_003931835.1_ASM393183v1_genomic.gbff
Klebsiella pneumoniae	blood	Homo sapiens	chromosome	China	65	GCA_003932915.1_ASM393291v1_genomic.gbff
Klebsiella pneumoniae	miss	Homo sapiens	chromosome	China	23	GCA_003953905.1_ASM395390v1_genomic.gbff
Klebsiella pneumoniae	blood	Homo sapiens	chromosome	China	437	GCA_004006035.1_ASM400603v1_genomic.gbff
Klebsiella pneumoniae	miss	Homo sapiens	chromosome	Sweden	101	GCA_004010995.1_ASM401099v1_genomic.gbff
Klebsiella pneumoniae	sputum	Homo sapiens	chromosome	China	11	GCA_004119955.1_ASM411995v1_genomic.gbff
Klebsiella pneumoniae	bile	Homo sapiens	chromosome	China	11	GCA_004119975.1_ASM411997v1_genomic.gbff
Klebsiella pneumoniae	ascites	Homo sapiens	chromosome	China	11	GCA_004119995.1_ASM411999v1_genomic.gbff
Klebsiella pneumoniae	sputum	Homo sapiens	chromosome	China	37	GCA_004120015.1_ASM412001v1_genomic.gbff
Klebsiella pneumoniae	sputum	Homo sapiens	chromosome	China	343	GCA_004120035.1_ASM412003v1_genomic.gbff
Klebsiella pneumoniae	urine	Homo sapiens	chromosome	China	661	GCA_004120055.1_ASM412005v1_genomic.gbff
Klebsiella pneumoniae	end of the catheter	Homo sapiens	chromosome	China	-	GCA_004120075.1_ASM412007v1_genomic.gbff
Klebsiella pneumoniae	blood	Homo sapiens	chromosome	China	11	GCA_004120095.1_ASM412009v1_genomic.gbff
Klebsiella pneumoniae	sputum	Homo sapiens	chromosome	China	11	GCA_004120115.1_ASM412011v1_genomic.gbff
Klebsiella pneumoniae	sputum	Homo sapiens	chromosome	China	-	GCA_004120135.1_ASM412013v1_genomic.gbff
Klebsiella pneumoniae	incision secretion	Homo sapiens	chromosome	China	-	GCA_004120155.1_ASM412015v1_genomic.gbff
Klebsiella pneumoniae	sputum	Homo sapiens	chromosome	China	17	GCA_004120175.1_ASM412017v1_genomic.gbff
Klebsiella pneumoniae	sputum	Homo sapiens	chromosome	Thailand	14	GCA_004135795.1_ASM413579v1_genomic.gbff
Klebsiella pneumoniae subsp. pneumoniae	anal sample	Homo sapiens	chromosome	Canada	11	GCA_004141975.1_ASM414197v1_genomic.gbff
Klebsiella pneumoniae	blood	Homo sapiens	chromosome	India	23	GCA_004209795.1_ASM420979v1_genomic.gbff
Klebsiella pneumoniae	blood	Homo sapiens	chromosome	India	15	GCA_004295385.1_ASM429538v1_genomic.gbff
Klebsiella pneumoniae	blood	Homo sapiens	chromosome	India	23	GCA_004295405.1_ASM429540v1_genomic.gbff
Klebsiella pneumoniae	blood	Homo sapiens	chromosome	India	15	GCA_004319525.1_ASM431952v1_genomic.gbff
Klebsiella pneumoniae	miss	Homo sapiens	chromosome	China	11	GCA_004322795.1_ASM432279v1_genomic.gbff
Klebsiella pneumoniae	rectal swab	Homo sapiens	chromosome	Canada	86	GCA_004332075.1_ASM433207v1_genomic.gbff
Klebsiella pneumoniae	blood	Homo sapiens	chromosome	China	2570	GCA_004801235.1_ASM480123v1_genomic.gbff
Klebsiella pneumoniae	urine	Homo sapiens	chromosome	USA	23	GCA_004924315.1_ASM492431v1_genomic.gbff
Klebsiella pneumoniae	blood	Homo sapiens	chromosome	India	11	GCA_005347525.1_ASM534752v1_genomic.gbff
Klebsiella pneumoniae	miss	Homo sapiens	chromosome	China	-	GCA_005377825.1_ASM537782v1_genomic.gbff
Klebsiella pneumoniae	blood	Homo sapiens	chromosome	China	11	GCA_005853785.1_ASM585378v1_genomic.gbff
Klebsiella pneumoniae	blood	Homo sapiens	chromosome	China	11	GCA_005854025.1_ASM585402v1_genomic.gbff
Klebsiella pneumoniae	blood	Homo sapiens	chromosome	China	11	GCA_005854245.1_ASM585424v1_genomic.gbff
Klebsiella pneumoniae subsp. pneumoniae	throat	Homo sapiens	chromosome	United Kingdom	15	GCA_005885775.1_ASM588577v1_genomic.gbff
Klebsiella pneumoniae	rectal swab	Homo sapiens	chromosome	United Kingdom	147	GCA_005944305.1_ASM594430v1_genomic.gbff
Klebsiella pneumoniae	urine	Homo sapiens	chromosome	China	11	GCA_006304565.1_ASM630456v1_genomic.gbff
Klebsiella pneumoniae	stool	Homo sapiens	chromosome	China	11	GCA_006494895.1_ASM649489v1_genomic.gbff
Klebsiella pneumoniae	stool	Homo sapiens	chromosome	China	11	GCA_006494915.1_ASM649491v1_genomic.gbff
Klebsiella pneumoniae	blood	Homo sapiens	chromosome	China	35	GCA_006965405.3_ASM696540v3_genomic.gbff
Klebsiella pneumoniae	gut	Homo sapiens	chromosome	China	1779	GCA_007197815.1_ASM719781v1_genomic.gbff
Klebsiella pneumoniae	urine	Homo sapiens	chromosome	USA	14	GCA_007833575.1_ASM783357v1_genomic.gbff
Klebsiella pneumoniae	miss	Homo sapiens	chromosome	Viet Nam	16	GCA_007873865.1_ASM787386v1_genomic.gbff
Klebsiella pneumoniae	SHIME feed	Homo sapiens	chromosome	China	22	GCA_007999005.1_ASM799900v1_genomic.gbff
Klebsiella pneumoniae	miss	Homo sapiens	chromosome	South Korea	16	GCA_008065415.1_ASM806541v1_genomic.gbff
Klebsiella pneumoniae	miss	Homo sapiens	chromosome	USA	258	GCA_008121515.1_ASM812151v1_genomic.gbff
Klebsiella pneumoniae	sputum	Homo sapiens	chromosome	Taiwan	-	GCA_008122285.1_ASM812228v1_genomic.gbff
Klebsiella pneumoniae	sputum	Homo sapiens	chromosome	Taiwan	268	GCA_008122305.1_ASM812230v1_genomic.gbff
Klebsiella pneumoniae	sputum	Homo sapiens	chromosome	China	-	GCA_008386255.1_ASM838625v1_genomic.gbff
Klebsiella pneumoniae	sputum	Homo sapiens	chromosome	China	-	GCA_008386275.1_ASM838627v1_genomic.gbff
Klebsiella pneumoniae	clinical isolate	Homo sapiens	chromosome	USA	147	GCA_008693405.1_ASM869340v1_genomic.gbff
Klebsiella pneumoniae	clinical isolate	Homo sapiens	chromosome	USA	-	GCA_008693425.1_ASM869342v1_genomic.gbff
Klebsiella pneumoniae	clinical isolate	Homo sapiens	chromosome	USA	231	GCA_008693445.1_ASM869344v1_genomic.gbff
Klebsiella pneumoniae	urine	Homo sapiens	chromosome	China	11	GCA_008728415.1_ASM872841v1_genomic.gbff
Klebsiella pneumoniae	urine	Homo sapiens	chromosome	China	11	GCA_008728695.1_ASM872869v1_genomic.gbff
Klebsiella pneumoniae	clinical sample	Homo sapiens	chromosome	Australia	12	GCA_008931345.1_ASM893134v1_genomic.gbff
Klebsiella pneumoniae	clinical sample	Homo sapiens	chromosome	Australia	1109	GCA_008931565.1_ASM893156v1_genomic.gbff
Klebsiella pneumoniae	stool	Homo sapiens	chromosome	Laos	39	GCA_009387775.1_ASM938777v1_genomic.gbff
Klebsiella pneumoniae	stool	Homo sapiens	chromosome	Thailand	873	GCA_009387815.1_ASM938781v1_genomic.gbff
Klebsiella pneumoniae	stool	Homo sapiens	chromosome	Laos	1315	GCA_009387915.1_ASM938791v1_genomic.gbff
Klebsiella pneumoniae	stool	Homo sapiens	chromosome	Laos	87	GCA_009387945.1_ASM938794v1_genomic.gbff
Klebsiella pneumoniae	miss	Homo sapiens	chromosome	China	23	GCA_009497695.1_ASM949769v1_genomic.gbff
Klebsiella pneumoniae	miss	Homo sapiens	chromosome	China	392	GCA_009497735.1_ASM949773v1_genomic.gbff
Klebsiella pneumoniae	miss	Homo sapiens	chromosome	China	1265	GCA_009497755.1_ASM949775v1_genomic.gbff
Klebsiella pneumoniae	miss	Homo sapiens	chromosome	Japan	25	GCA_009556655.1_ASM955665v1_genomic.gbff
Klebsiella pneumoniae	blood	Homo sapiens	chromosome	USA	-	GCA_009601745.1_ASM960174v1_genomic.gbff
Klebsiella pneumoniae	urine	Homo sapiens	chromosome	USA	16	GCA_009720445.1_ASM972044v1_genomic.gbff
Klebsiella pneumoniae	human sputum	Homo sapiens	chromosome	Nepal	147	GCA_009731405.1_ASM973140v1_genomic.gbff
Klebsiella pneumoniae	miss	Homo sapiens	chromosome	Bangladesh	15	GCA_009734105.1_ASM973410v1_genomic.gbff
Klebsiella pneumoniae	miss	Homo sapiens	chromosome	Taiwan	-	GCA_009740025.1_ASM974002v1_genomic.gbff
Klebsiella pneumoniae	miss	Homo sapiens	chromosome	Taiwan	-	GCA_009740045.1_ASM974004v1_genomic.gbff
Klebsiella pneumoniae	miss	Homo sapiens	chromosome	Taiwan	-	GCA_009740065.1_ASM974006v1_genomic.gbff
Klebsiella pneumoniae	miss	Homo sapiens	chromosome	Taiwan	-	GCA_009740085.1_ASM974008v1_genomic.gbff
Klebsiella pneumoniae	miss	Homo sapiens	chromosome	Taiwan	-	GCA_009740225.1_ASM974022v1_genomic.gbff
Klebsiella pneumoniae	miss	Homo sapiens	chromosome	Taiwan	-	GCA_009740245.1_ASM974024v1_genomic.gbff
Klebsiella pneumoniae	miss	Homo sapiens	chromosome	Bangladesh	15	GCA_009791475.1_ASM979147v1_genomic.gbff
Klebsiella pneumoniae	miss	Homo sapiens	chromosome	Bangladesh	15	GCA_009791495.1_ASM979149v1_genomic.gbff
Klebsiella pneumoniae	blood	female	chromosome	China	11	GCA_009833945.1_ASM983394v1_genomic.gbff
Klebsiella pneumoniae	blood	Homo sapiens	chromosome	China	11	GCA_009834285.1_ASM983428v1_genomic.gbff
Klebsiella pneumoniae	miss	Homo sapiens	chromosome	China	11	GCA_009856585.1_ASM985658v1_genomic.gbff
Klebsiella pneumoniae subsp. pneumoniae KpQ3	blood culture	Homo sapiens	scaffold	Spain	37	GCA_000300835.1_K1_1_genomic.fna
Klebsiella pneumoniae LCT-KP182	miss	Homo sapiens	scaffold	China	48	GCA_000441835.1_LCT-KP182_for_vertion_2.04_of_Klebsiella_pneumoniae_genome_genomic.fna
Klebsiella pneumoniae LCT-KP289	miss	Homo sapiens	scaffold	China	48	GCA_000441855.1_LCT-KP289_for_vertion_2.04_of_Klebsiella_pneumoniae_genome_genomic.fna
Klebsiella pneumoniae subsp. pneumoniae KKBO-1	blood	Homo sapiens	scaffold	Italy	258	GCA_000495875.1_SeK50_genomic.fna
Klebsiella pneumoniae subsp. pneumoniae KKBO-4	blood	Homo sapiens	scaffold	Italy	258	GCA_000495895.2_SfK50_genomic.fna
Klebsiella pneumoniae CHS 60	Urine	Homo sapiens	scaffold	USA	258	GCA_000633735.1_Kleb_pneu_CHS_60_V1_genomic.fna
Klebsiella pneumoniae CHS 47	Urine	Homo sapiens	scaffold	USA	258	GCA_000633755.1_Kleb_pneu_CHS_47_V1_genomic.fna
Klebsiella pneumoniae CHS 42	Urine	Homo sapiens	scaffold	USA	258	GCA_000633775.1_Kleb_pneu_CHS_42_V1_genomic.fna
Klebsiella pneumoniae BIDMC 54	URINE	Homo sapiens	scaffold	USA	258	GCA_000692935.1_Kleb_pneu_BIDMC_54_V1_genomic.fna
Klebsiella pneumoniae BIDMC 55	URINE	Homo sapiens	scaffold	USA	105	GCA_000692955.1_Kleb_pneu_BIDMC_55_V1_genomic.fna
Klebsiella pneumoniae BIDMC 60	PERITONEAL FLUID	Homo sapiens	scaffold	USA	258	GCA_000692975.1_Kleb_pneu_BIDMC_60_V1_genomic.fna
Klebsiella pneumoniae BIDMC 68	BLOOD CULTURE	Homo sapiens	scaffold	USA	258	GCA_000693015.1_Kleb_pneu_BIDMC_68_V1_genomic.fna
Klebsiella pneumoniae BIDMC 69	SPUTUM	Homo sapiens	scaffold	USA	17	GCA_000693035.1_Kleb_pneu_BIDMC_69_V1_genomic.fna
Klebsiella pneumoniae BWH 45	Tissue	Homo sapiens	scaffold	USA	258	GCA_000693055.1_Kleb_pneu_BWH_45_V1_genomic.fna
Klebsiella pneumoniae BWH 46	Sputum	Homo sapiens	scaffold	USA	592	GCA_000693075.1_Kleb_pneu_BWH_46_V1_genomic.fna
Klebsiella pneumoniae BWH 47	tissue	Homo sapiens	scaffold	USA	258	GCA_000693095.1_Kleb_pneu_BWH_47_V1_genomic.fna
Klebsiella pneumoniae BWH 48	urine	Homo sapiens	scaffold	USA	17	GCA_000693115.1_Kleb_pneu_BWH_48_V1_genomic.fna
Klebsiella pneumoniae CHS 02	Urine	Homo sapiens	scaffold	USA	1199	GCA_000693135.1_Kleb_pneu_CHS_02_V1_genomic.fna
Klebsiella pneumoniae CHS 03	Urine	Homo sapiens	scaffold	USA	258	GCA_000693155.1_Kleb_pneu_CHS_03_V1_genomic.fna
Klebsiella pneumoniae CHS 05	Rectal swab	Homo sapiens	scaffold	USA	258	GCA_000693175.1_Kleb_pneu_CHS_05_V1_genomic.fna
Klebsiella pneumoniae CHS 06	Groin Wnd	Homo sapiens	scaffold	USA	258	GCA_000693195.1_Kleb_pneu_CHS_06_V1_genomic.fna
Klebsiella pneumoniae CHS 07	Urine	Homo sapiens	scaffold	USA	258	GCA_000693215.1_Kleb_pneu_CHS_07_V1_genomic.fna
Klebsiella pneumoniae CHS 09	Urine	Homo sapiens	scaffold	USA	258	GCA_000693235.1_Kleb_pneu_CHS_09_V1_genomic.fna
Klebsiella pneumoniae CHS 11	Urine	Homo sapiens	scaffold	USA	258	GCA_000693255.1_Kleb_pneu_CHS_11_V1_genomic.fna
Klebsiella pneumoniae CHS 12	Trach	Homo sapiens	scaffold	USA	258	GCA_000693275.1_Kleb_pneu_CHS_12_V1_genomic.fna
Klebsiella pneumoniae CHS 13	Urine	Homo sapiens	scaffold	USA	258	GCA_000693295.1_Kleb_pneu_CHS_13_V1_genomic.fna
Klebsiella pneumoniae CHS 14	Urine	Homo sapiens	scaffold	USA	258	GCA_000693315.1_Kleb_pneu_CHS_14_V1_genomic.fna
Klebsiella pneumoniae CHS 17	Blood	Homo sapiens	scaffold	USA	258	GCA_000693335.1_Kleb_pneu_CHS_17_V1_genomic.fna
Klebsiella pneumoniae CHS 18	Blood	Homo sapiens	scaffold	USA	258	GCA_000693355.1_Kleb_pneu_CHS_18_V1_genomic.fna
Klebsiella pneumoniae CHS 19	Blood	Homo sapiens	scaffold	USA	258	GCA_000693375.1_Kleb_pneu_CHS_19_V1_genomic.fna
Klebsiella pneumoniae CHS 20	Urine	Homo sapiens	scaffold	USA	258	GCA_000693395.1_Kleb_pneu_CHS_20_V1_genomic.fna
Klebsiella pneumoniae CHS 22	Urine	Homo sapiens	scaffold	USA	258	GCA_000693415.1_Kleb_pneu_CHS_22_V1_genomic.fna
Klebsiella pneumoniae CHS 23	Blood	Homo sapiens	scaffold	USA	258	GCA_000693435.1_Kleb_pneu_CHS_23_V1_genomic.fna
Klebsiella pneumoniae CHS 24	Blood	Homo sapiens	scaffold	USA	11	GCA_000693455.1_Kleb_pneu_CHS_24_V1_genomic.fna
Klebsiella pneumoniae CHS 25	Blood	Homo sapiens	scaffold	USA	258	GCA_000693475.1_Kleb_pneu_CHS_25_V1_genomic.fna
Klebsiella pneumoniae CHS 26	Urine	Homo sapiens	scaffold	USA	258	GCA_000693495.1_Kleb_pneu_CHS_26_V1_genomic.fna
Klebsiella pneumoniae CHS 27	ABSC	Homo sapiens	scaffold	USA	258	GCA_000693515.1_Kleb_pneu_CHS_27_V1_genomic.fna
Klebsiella pneumoniae CHS 28	Urine	Homo sapiens	scaffold	USA	258	GCA_000693535.1_Kleb_pneu_CHS_28_V1_genomic.fna
Klebsiella pneumoniae CHS 29	Urine	Homo sapiens	scaffold	USA	258	GCA_000693555.1_Kleb_pneu_CHS_29_V1_genomic.fna
Klebsiella pneumoniae CHS 30	Urine	Homo sapiens	scaffold	USA	258	GCA_000693575.1_Kleb_pneu_CHS_30_V1_genomic.fna
Klebsiella pneumoniae CHS 31	Urine	Homo sapiens	scaffold	USA	258	GCA_000693595.1_Kleb_pneu_CHS_31_V1_genomic.fna
Klebsiella pneumoniae CHS 32	Urine	Homo sapiens	scaffold	USA	258	GCA_000693615.1_Kleb_pneu_CHS_32_V1_genomic.fna
Klebsiella pneumoniae CHS 33	Blood	Homo sapiens	scaffold	USA	258	GCA_000693635.1_Kleb_pneu_CHS_33_V1_genomic.fna
Klebsiella pneumoniae CHS 34	Urine	Homo sapiens	scaffold	USA	258	GCA_000693655.1_Kleb_pneu_CHS_34_V1_genomic.fna
Klebsiella pneumoniae CHS 35	Trach	Homo sapiens	scaffold	USA	258	GCA_000693675.1_Kleb_pneu_CHS_35_V1_genomic.fna
Klebsiella pneumoniae CHS 36	Urine	Homo sapiens	scaffold	USA	258	GCA_000693695.1_Kleb_pneu_CHS_36_V1_genomic.fna
Klebsiella pneumoniae CHS 37	Blood	Homo sapiens	scaffold	USA	258	GCA_000693715.1_Kleb_pneu_CHS_37_V1_genomic.fna
Klebsiella pneumoniae CHS 38	Urine	Homo sapiens	scaffold	USA	258	GCA_000693735.1_Kleb_pneu_CHS_38_V1_genomic.fna
Klebsiella pneumoniae CHS 39	Asidic	Homo sapiens	scaffold	USA	258	GCA_000693755.1_Kleb_pneu_CHS_39_V1_genomic.fna
Klebsiella pneumoniae CHS 40	Urine	Homo sapiens	scaffold	USA	258	GCA_000693775.1_Kleb_pneu_CHS_40_V1_genomic.fna
Klebsiella pneumoniae CHS 41	Urine	Homo sapiens	scaffold	USA	258	GCA_000693795.1_Kleb_pneu_CHS_41_V1_genomic.fna
Klebsiella pneumoniae CHS 43	Urine	Homo sapiens	scaffold	USA	25	GCA_000693815.1_Kleb_pneu_CHS_43_V1_genomic.fna
Klebsiella pneumoniae CHS 44	Urine	Homo sapiens	scaffold	USA	258	GCA_000693835.1_Kleb_pneu_CHS_44_V1_genomic.fna
Klebsiella pneumoniae CHS 45	Urine	Homo sapiens	scaffold	USA	258	GCA_000693855.1_Kleb_pneu_CHS_45_V1_genomic.fna
Klebsiella pneumoniae CHS 46	Urine	Homo sapiens	scaffold	USA	258	GCA_000693875.1_Kleb_pneu_CHS_46_V1_genomic.fna
Klebsiella pneumoniae CHS 48	Abscess	Homo sapiens	scaffold	USA	25	GCA_000693895.1_Kleb_pneu_CHS_48_V1_genomic.fna
Klebsiella pneumoniae CHS 49	Urine	Homo sapiens	scaffold	USA	258	GCA_000693915.1_Kleb_pneu_CHS_49_V1_genomic.fna
Klebsiella pneumoniae CHS 50	Wound	Homo sapiens	scaffold	USA	258	GCA_000693935.1_Kleb_pneu_CHS_50_V1_genomic.fna
Klebsiella pneumoniae CHS 51	Urine	Homo sapiens	scaffold	USA	258	GCA_000693955.1_Kleb_pneu_CHS_51_V1_genomic.fna
Klebsiella pneumoniae CHS 52	Urine	Homo sapiens	scaffold	USA	258	GCA_000693975.1_Kleb_pneu_CHS_52_V1_genomic.fna
Klebsiella pneumoniae CHS 53	Trach	Homo sapiens	scaffold	USA	258	GCA_000693995.1_Kleb_pneu_CHS_53_V1_genomic.fna
Klebsiella pneumoniae CHS 54	Blood	Homo sapiens	scaffold	USA	258	GCA_000694015.1_Kleb_pneu_CHS_54_V1_genomic.fna
Klebsiella pneumoniae CHS 55	Blood	Homo sapiens	scaffold	USA	258	GCA_000694035.1_Kleb_pneu_CHS_55_V1_genomic.fna
Klebsiella pneumoniae CHS 56	Urine	Homo sapiens	scaffold	USA	258	GCA_000694055.1_Kleb_pneu_CHS_56_V1_genomic.fna
Klebsiella pneumoniae CHS 57	Urine	Homo sapiens	scaffold	USA	258	GCA_000694075.1_Kleb_pneu_CHS_57_V1_genomic.fna
Klebsiella pneumoniae CHS 58	Urine	Homo sapiens	scaffold	USA	258	GCA_000694095.1_Kleb_pneu_CHS_58_V1_genomic.fna
Klebsiella pneumoniae CHS 59	Urine	Homo sapiens	scaffold	USA	258	GCA_000694115.1_Kleb_pneu_CHS_59_V1_genomic.fna
Klebsiella pneumoniae CHS 61	Urine	Homo sapiens	scaffold	USA	258	GCA_000694135.1_Kleb_pneu_CHS_61_V1_genomic.fna
Klebsiella pneumoniae CHS 62	Urine	Homo sapiens	scaffold	USA	258	GCA_000694155.1_Kleb_pneu_CHS_62_V1_genomic.fna
Klebsiella pneumoniae CHS 63	Urine	Homo sapiens	scaffold	USA	258	GCA_000694175.1_Kleb_pneu_CHS_63_V1_genomic.fna
Klebsiella pneumoniae CHS 64	Urine	Homo sapiens	scaffold	USA	258	GCA_000694195.1_Kleb_pneu_CHS_64_V1_genomic.fna
Klebsiella pneumoniae CHS 65	Urine	Homo sapiens	scaffold	USA	258	GCA_000694215.1_Kleb_pneu_CHS_65_V1_genomic.fna
Klebsiella pneumoniae CHS 66	Urine	Homo sapiens	scaffold	USA	14	GCA_000694235.1_Kleb_pneu_CHS_66_V1_genomic.fna
Klebsiella pneumoniae CHS 67	Blood/Urine	Homo sapiens	scaffold	USA	258	GCA_000694255.1_Kleb_pneu_CHS_67_V1_genomic.fna
Klebsiella pneumoniae CHS 70	Urine	Homo sapiens	scaffold	USA	258	GCA_000694275.1_Kleb_pneu_CHS_70_V1_genomic.fna
Klebsiella pneumoniae CHS 71	Urine	Homo sapiens	scaffold	USA	258	GCA_000694295.1_Kleb_pneu_CHS_71_V1_genomic.fna
Klebsiella pneumoniae CHS 72	Urine	Homo sapiens	scaffold	USA	258	GCA_000694315.1_Kleb_pneu_CHS_72_V1_genomic.fna
Klebsiella pneumoniae CHS 73	Urine	Homo sapiens	scaffold	USA	258	GCA_000694335.1_Kleb_pneu_CHS_73_V1_genomic.fna
Klebsiella pneumoniae CHS 74	Urine	Homo sapiens	scaffold	USA	258	GCA_000694355.1_Kleb_pneu_CHS_74_V1_genomic.fna
Klebsiella pneumoniae CHS 75	Urine	Homo sapiens	scaffold	USA	258	GCA_000694375.1_Kleb_pneu_CHS_75_V1_genomic.fna
Klebsiella pneumoniae CHS 76	Urine	Homo sapiens	scaffold	USA	258	GCA_000694395.1_Kleb_pneu_CHS_76_V1_genomic.fna
Klebsiella pneumoniae CHS 80	Urine	Homo sapiens	scaffold	USA	258	GCA_000694415.1_Kleb_pneu_CHS_80_V1_genomic.fna
Klebsiella pneumoniae MGH 51	Urine	Homo sapiens	scaffold	USA	258	GCA_000694435.1_Kleb_pneu_MGH_51_V1_genomic.fna
Klebsiella pneumoniae MGH 52	Urine	Homo sapiens	scaffold	USA	70	GCA_000694455.1_Kleb_pneu_MGH_52_V1_genomic.fna
Klebsiella pneumoniae MGH 60	Sputum	Homo sapiens	scaffold	USA	17	GCA_000694495.1_Kleb_pneu_MGH_60_V1_genomic.fna
Klebsiella pneumoniae MGH 64	Urine	Homo sapiens	scaffold	USA	35	GCA_000694515.1_Kleb_pneu_MGH_64_V1_genomic.fna
Klebsiella pneumoniae MGH 65	Bile (fluid)	Homo sapiens	scaffold	USA	15	GCA_000694535.1_Kleb_pneu_MGH_65_V1_genomic.fna
Klebsiella pneumoniae MGH 66	Urine	Homo sapiens	scaffold	USA	29	GCA_000694555.1_Kleb_pneu_MGH_66_V1_genomic.fna
Klebsiella pneumoniae MGH 67	Pleural tissue	Homo sapiens	scaffold	USA	258	GCA_000694575.1_Kleb_pneu_MGH_67_V1_genomic.fna
Klebsiella pneumoniae MGH 69	Sputum	Homo sapiens	scaffold	USA	11	GCA_000694615.1_Kleb_pneu_MGH_69_V1_genomic.fna
Klebsiella pneumoniae MGH 70	Urine	Homo sapiens	scaffold	USA	20	GCA_000694635.1_Kleb_pneu_MGH_70_V1_genomic.fna
Klebsiella pneumoniae MGH 71	Urine	Homo sapiens	scaffold	USA	258	GCA_000694655.1_Kleb_pneu_MGH_71_V1_genomic.fna
Klebsiella pneumoniae MGH 72	Urine	Homo sapiens	scaffold	USA	37	GCA_000694675.1_Kleb_pneu_MGH_72_V1_genomic.fna
Klebsiella pneumoniae MGH 73	Wound - deep sinus	Homo sapiens	scaffold	USA	258	GCA_000694695.1_Kleb_pneu_MGH_73_V1_genomic.fna
Klebsiella pneumoniae MGH 74	Urine	Homo sapiens	scaffold	USA	76	GCA_000694715.1_Kleb_pneu_MGH_74_V1_genomic.fna
Klebsiella pneumoniae MGH 79	Urine	Homo sapiens	scaffold	USA	258	GCA_000694755.1_Kleb_pneu_MGH_79_V1_genomic.fna
Klebsiella pneumoniae UCI 55	wound	Homo sapiens	scaffold	USA	258	GCA_000694795.1_Kleb_pneu_UCI_55_V1_genomic.fna
Klebsiella pneumoniae UCI 56	sputum	Homo sapiens	scaffold	USA	678	GCA_000694815.1_Kleb_pneu_UCI_56_V1_genomic.fna
Klebsiella pneumoniae UCI 59	wound	Homo sapiens	scaffold	USA	258	GCA_000694835.1_Kleb_pneu_UCI_59_V1_genomic.fna
Klebsiella pneumoniae UCI 61	urine	Homo sapiens	scaffold	USA	258	GCA_000694855.1_Kleb_pneu_UCI_61_V1_genomic.fna
Klebsiella pneumoniae UCI 62	urine	Homo sapiens	scaffold	USA	34	GCA_000694875.1_Kleb_pneu_UCI_62_V1_genomic.fna
Klebsiella pneumoniae UCI 63	wound	Homo sapiens	scaffold	USA	258	GCA_000694895.1_Kleb_pneu_UCI_63_V1_genomic.fna
Klebsiella pneumoniae UCI 67	sputum	Homo sapiens	scaffold	USA	258	GCA_000694915.1_Kleb_pneu_UCI_67_V1_genomic.fna
Klebsiella pneumoniae UCI 68	urine	Homo sapiens	scaffold	USA	37	GCA_000694935.1_Kleb_pneu_UCI_68_V1_genomic.fna
Klebsiella pneumoniae UCI 17	urine	Homo sapiens	scaffold	USA	437	GCA_000706585.1_Kleb_pneu_UCI_17_V1_genomic.fna
Klebsiella pneumoniae	Bronchoscopy	Homo sapiens	scaffold	USA	258	GCA_000738865.1_ASM73886v1_genomic.fna
Klebsiella pneumoniae	wound	Homo sapiens	scaffold	USA	258	GCA_000738875.1_ASM73887v1_genomic.fna
Klebsiella pneumoniae	soldier combat wound	Homo sapiens	scaffold	USA	-	GCA_000764635.1_ASM76463v1_genomic.fna
Klebsiella pneumoniae	miss	Homo sapiens	scaffold	China	29	GCA_000785625.1_ASM78562v1_genomic.fna
Klebsiella pneumoniae	wound	Homo sapiens	scaffold	USA	395	GCA_000787995.1_ASM78799v1_genomic.fna
Klebsiella pneumoniae	wound	Homo sapiens	scaffold	USA	-	GCA_000788005.1_ASM78800v1_genomic.fna
Klebsiella pneumoniae	Severe Trauma Site	Homo sapiens	scaffold	USA	3	GCA_000788025.1_ASM78802v1_genomic.fna
Klebsiella pneumoniae	blood	Homo sapiens	scaffold	Australia	147	GCA_000817855.1_ASM81785v1_genomic.fna
Klebsiella pneumoniae	urine	Homo sapiens	scaffold	Australia	485	GCA_000818615.1_ASM81861v1_genomic.fna
Klebsiella pneumoniae	respiratory secretions	Homo sapiens	scaffold	USA	147	GCA_000958945.1_matepair3_genomic.fna
Klebsiella pneumoniae	respiratory secretions	Homo sapiens	scaffold	USA	147	GCA_000958965.1_matepair4_genomic.fna
Klebsiella pneumoniae	sputum	Homo sapiens	scaffold	USA	437	GCA_000971075.1_ASM97107v1_genomic.fna
Klebsiella pneumoniae	miss	Homo sapiens	scaffold	USA	258	GCA_001030715.1_Kleb_oxyt_CHS153_V1_genomic.fna
Klebsiella pneumoniae	miss	Homo sapiens	scaffold	USA	258	GCA_001030745.1_Kleb_oxyt_CHS222_V1_genomic.fna
Klebsiella pneumoniae	miss	Homo sapiens	scaffold	USA	258	GCA_001030795.1_Kleb_pneu_CHS81_V1_genomic.fna
Klebsiella pneumoniae	miss	Homo sapiens	scaffold	USA	258	GCA_001030825.1_Kleb_pneu_CHS82_V1_genomic.fna
Klebsiella pneumoniae	miss	Homo sapiens	scaffold	USA	258	GCA_001030835.1_Kleb_pneu_CHS83_V1_genomic.fna
Klebsiella pneumoniae	miss	Homo sapiens	scaffold	USA	258	GCA_001030845.1_Kleb_pneu_CHS84_V1_genomic.fna
Klebsiella pneumoniae	miss	Homo sapiens	scaffold	USA	258	GCA_001030875.1_Kleb_pneu_CHS85_V1_genomic.fna
Klebsiella pneumoniae	miss	Homo sapiens	scaffold	USA	258	GCA_001030905.1_Kleb_pneu_CHS88_V1_genomic.fna
Klebsiella pneumoniae	miss	Homo sapiens	scaffold	USA	258	GCA_001030915.1_Kleb_pneu_CHS89_V1_genomic.fna
Klebsiella pneumoniae	miss	Homo sapiens	scaffold	USA	258	GCA_001030935.1_Kleb_pneu_CHS90_V1_genomic.fna
Klebsiella pneumoniae	miss	Homo sapiens	scaffold	USA	258	GCA_001030945.1_Kleb_pneu_CHS91_V1_genomic.fna
Klebsiella pneumoniae	miss	Homo sapiens	scaffold	USA	258	GCA_001030985.1_Kleb_pneu_CHS92_V1_genomic.fna
Klebsiella pneumoniae	miss	Homo sapiens	scaffold	USA	11	GCA_001030995.1_Kleb_pneu_CHS93_V1_genomic.fna
Klebsiella pneumoniae	miss	Homo sapiens	scaffold	USA	258	GCA_001031015.1_Kleb_pneu_CHS94_V1_genomic.fna
Klebsiella pneumoniae	miss	Homo sapiens	scaffold	USA	258	GCA_001031025.1_Kleb_pneu_CHS95_V1_genomic.fna
Klebsiella pneumoniae	miss	Homo sapiens	scaffold	USA	258	GCA_001031065.1_Kleb_pneu_CHS96_V1_genomic.fna
Klebsiella pneumoniae	miss	Homo sapiens	scaffold	USA	258	GCA_001031075.1_Kleb_pneu_CHS97_V1_genomic.fna
Klebsiella pneumoniae	miss	Homo sapiens	scaffold	USA	258	GCA_001031095.1_Kleb_pneu_CHS98_V1_genomic.fna
Klebsiella pneumoniae	miss	Homo sapiens	scaffold	USA	258	GCA_001031105.1_Kleb_pneu_CHS99_V1_genomic.fna
Klebsiella pneumoniae	miss	Homo sapiens	scaffold	USA	258	GCA_001031145.1_Kleb_pneu_CHS100_V1_genomic.fna
Klebsiella pneumoniae	miss	Homo sapiens	scaffold	USA	258	GCA_001031155.1_Kleb_pneu_CHS101_V1_genomic.fna
Klebsiella pneumoniae	miss	Homo sapiens	scaffold	USA	258	GCA_001031175.1_Kleb_pneu_CHS102_V1_genomic.fna
Klebsiella pneumoniae	miss	Homo sapiens	scaffold	USA	258	GCA_001031185.1_Kleb_pneu_CHS104_V1_genomic.fna
Klebsiella pneumoniae	miss	Homo sapiens	scaffold	USA	258	GCA_001031225.1_Kleb_pneu_CHS105_V1_genomic.fna
Klebsiella pneumoniae	miss	Homo sapiens	scaffold	USA	258	GCA_001031235.1_Kleb_pneu_CHS106_V1_genomic.fna
Klebsiella pneumoniae	miss	Homo sapiens	scaffold	USA	432	GCA_001031245.1_Kleb_pneu_CHS107_V1_genomic.fna
Klebsiella pneumoniae	miss	Homo sapiens	scaffold	USA	258	GCA_001031265.1_Kleb_pneu_CHS109_V1_genomic.fna
Klebsiella pneumoniae	miss	Homo sapiens	scaffold	USA	258	GCA_001031305.1_Kleb_pneu_CHS110_V1_genomic.fna
Klebsiella pneumoniae	miss	Homo sapiens	scaffold	USA	258	GCA_001031315.1_Kleb_pneu_CHS111_V1_genomic.fna
Klebsiella pneumoniae	miss	Homo sapiens	scaffold	USA	15	GCA_001031325.1_Kleb_pneu_CHS112_V1_genomic.fna
Klebsiella pneumoniae	miss	Homo sapiens	scaffold	USA	258	GCA_001031345.1_Kleb_pneu_CHS113_V1_genomic.fna
Klebsiella pneumoniae	miss	Homo sapiens	scaffold	USA	258	GCA_001031385.1_Kleb_pneu_CHS114_V1_genomic.fna
Klebsiella pneumoniae	miss	Homo sapiens	scaffold	USA	258	GCA_001031395.1_Kleb_pneu_CHS115_V1_genomic.fna
Klebsiella pneumoniae	miss	Homo sapiens	scaffold	USA	258	GCA_001031405.1_Kleb_pneu_CHS116_V1_genomic.fna
Klebsiella pneumoniae	miss	Homo sapiens	scaffold	USA	258	GCA_001031415.1_Kleb_pneu_CHS117_V1_genomic.fna
Klebsiella pneumoniae	miss	Homo sapiens	scaffold	USA	258	GCA_001031465.1_Kleb_pneu_CHS118_V1_genomic.fna
Klebsiella pneumoniae	miss	Homo sapiens	scaffold	USA	405	GCA_001031475.1_Kleb_pneu_CHS121_V1_genomic.fna
Klebsiella pneumoniae	miss	Homo sapiens	scaffold	USA	258	GCA_001031485.1_Kleb_pneu_CHS122_V1_genomic.fna
Klebsiella pneumoniae	miss	Homo sapiens	scaffold	USA	258	GCA_001031515.1_Kleb_pneu_CHS123_V1_genomic.fna
Klebsiella pneumoniae	miss	Homo sapiens	scaffold	USA	258	GCA_001031545.1_Kleb_pneu_CHS126_V1_genomic.fna
Klebsiella pneumoniae	miss	Homo sapiens	scaffold	USA	258	GCA_001031555.1_Kleb_pneu_CHS125_V1_genomic.fna
Klebsiella pneumoniae	miss	Homo sapiens	scaffold	USA	258	GCA_001031565.1_Kleb_pneu_CHS127_V1_genomic.fna
Klebsiella pneumoniae	miss	Homo sapiens	scaffold	USA	258	GCA_001031595.1_Kleb_pneu_CHS128_V1_genomic.fna
Klebsiella pneumoniae	miss	Homo sapiens	scaffold	USA	258	GCA_001031625.1_Kleb_pneu_CHS129_V1_genomic.fna
Klebsiella pneumoniae	miss	Homo sapiens	scaffold	USA	258	GCA_001031635.1_Kleb_pneu_CHS131_V1_genomic.fna
Klebsiella pneumoniae	miss	Homo sapiens	scaffold	USA	258	GCA_001031645.1_Kleb_pneu_CHS132_V1_genomic.fna
Klebsiella pneumoniae	miss	Homo sapiens	scaffold	USA	258	GCA_001031675.1_Kleb_pneu_CHS133_V1_genomic.fna
Klebsiella pneumoniae	miss	Homo sapiens	scaffold	USA	258	GCA_001031705.1_Kleb_pneu_CHS134_V1_genomic.fna
Klebsiella pneumoniae	miss	Homo sapiens	scaffold	USA	258	GCA_001031715.1_Kleb_pneu_CHS135_V1_genomic.fna
Klebsiella pneumoniae	miss	Homo sapiens	scaffold	USA	258	GCA_001031725.1_Kleb_pneu_CHS137_V1_genomic.fna
Klebsiella pneumoniae	miss	Homo sapiens	scaffold	USA	258	GCA_001031745.1_Kleb_pneu_CHS138_V1_genomic.fna
Klebsiella pneumoniae	miss	Homo sapiens	scaffold	USA	258	GCA_001031785.1_Kleb_pneu_CHS139_V1_genomic.fna
Klebsiella pneumoniae	miss	Homo sapiens	scaffold	USA	14	GCA_001031795.1_Kleb_pneu_CHS140_V1_genomic.fna
Klebsiella pneumoniae	miss	Homo sapiens	scaffold	USA	258	GCA_001031805.1_Kleb_pneu_CHS141_V1_genomic.fna
Klebsiella pneumoniae	miss	Homo sapiens	scaffold	USA	258	GCA_001031825.1_Kleb_pneu_CHS142_V1_genomic.fna
Klebsiella pneumoniae	miss	Homo sapiens	scaffold	USA	258	GCA_001031865.1_Kleb_pneu_CHS144_V1_genomic.fna
Klebsiella pneumoniae	miss	Homo sapiens	scaffold	USA	1411	GCA_001031875.1_Kleb_pneu_CHS145_V1_genomic.fna
Klebsiella pneumoniae	miss	Homo sapiens	scaffold	USA	29	GCA_001031895.1_Kleb_pneu_CHS146_V1_genomic.fna
Klebsiella pneumoniae	miss	Homo sapiens	scaffold	USA	258	GCA_001031905.1_Kleb_pneu_CHS147_V1_genomic.fna
Klebsiella pneumoniae	miss	Homo sapiens	scaffold	USA	258	GCA_001031945.1_Kleb_pneu_CHS148_V1_genomic.fna
Klebsiella pneumoniae	miss	Homo sapiens	scaffold	USA	258	GCA_001031955.1_Kleb_pneu_CHS150_V1_genomic.fna
Klebsiella pneumoniae	miss	Homo sapiens	scaffold	USA	258	GCA_001031965.1_Kleb_pneu_CHS149_V1_genomic.fna
Klebsiella pneumoniae	miss	Homo sapiens	scaffold	USA	258	GCA_001031995.1_Kleb_pneu_CHS151_V1_genomic.fna
Klebsiella pneumoniae	miss	Homo sapiens	scaffold	USA	258	GCA_001032025.1_Kleb_pneu_CHS152_V1_genomic.fna
Klebsiella pneumoniae	miss	Homo sapiens	scaffold	USA	258	GCA_001032035.1_Kleb_pneu_CHS154_V1_genomic.fna
Klebsiella pneumoniae	miss	Homo sapiens	scaffold	USA	258	GCA_001032045.1_Kleb_pneu_CHS155_V1_genomic.fna
Klebsiella pneumoniae	miss	Homo sapiens	scaffold	USA	258	GCA_001032075.1_Kleb_pneu_CHS156_V1_genomic.fna
Klebsiella pneumoniae	miss	Homo sapiens	scaffold	USA	258	GCA_001032105.1_Kleb_pneu_CHS157_V1_genomic.fna
Klebsiella pneumoniae	miss	Homo sapiens	scaffold	USA	258	GCA_001032115.1_Kleb_pneu_CHS158_V1_genomic.fna
Klebsiella pneumoniae	miss	Homo sapiens	scaffold	USA	158	GCA_001032125.1_Kleb_pneu_CHS159_V1_genomic.fna
Klebsiella pneumoniae	miss	Homo sapiens	scaffold	USA	258	GCA_001032145.1_Kleb_pneu_CHS160_V1_genomic.fna
Klebsiella pneumoniae	miss	Homo sapiens	scaffold	USA	29	GCA_001032185.1_Kleb_pneu_CHS161_V1_genomic.fna
Klebsiella pneumoniae	miss	Homo sapiens	scaffold	USA	258	GCA_001032195.1_Kleb_pneu_CHS163_V1_genomic.fna
Klebsiella pneumoniae	miss	Homo sapiens	scaffold	USA	-	GCA_001032205.1_Kleb_pneu_CHS162_V1_genomic.fna
Klebsiella pneumoniae	miss	Homo sapiens	scaffold	USA	258	GCA_001032225.1_Kleb_pneu_CHS164_V1_genomic.fna
Klebsiella pneumoniae	miss	Homo sapiens	scaffold	USA	258	GCA_001032265.1_Kleb_pneu_CHS165_V1_genomic.fna
Klebsiella pneumoniae	miss	Homo sapiens	scaffold	USA	258	GCA_001032275.1_Kleb_pneu_CHS166_V1_genomic.fna
Klebsiella pneumoniae	miss	Homo sapiens	scaffold	USA	258	GCA_001032285.1_Kleb_pneu_CHS167_V1_genomic.fna
Klebsiella pneumoniae	miss	Homo sapiens	scaffold	USA	258	GCA_001032305.1_Kleb_pneu_CHS168_V1_genomic.fna
Klebsiella pneumoniae	miss	Homo sapiens	scaffold	USA	258	GCA_001032345.1_Kleb_pneu_CHS169_V1_genomic.fna
Klebsiella pneumoniae	miss	Homo sapiens	scaffold	USA	258	GCA_001032355.1_Kleb_pneu_CHS170_V1_genomic.fna
Klebsiella pneumoniae	miss	Homo sapiens	scaffold	USA	258	GCA_001032365.1_Kleb_pneu_CHS172_V1_genomic.fna
Klebsiella pneumoniae	miss	Homo sapiens	scaffold	USA	258	GCA_001032375.1_Kleb_pneu_CHS173_V1_genomic.fna
Klebsiella pneumoniae	miss	Homo sapiens	scaffold	USA	-	GCA_001032425.1_Kleb_pneu_CHS174_V1_genomic.fna
Klebsiella pneumoniae	miss	Homo sapiens	scaffold	USA	258	GCA_001032435.1_Kleb_pneu_CHS176_V1_genomic.fna
Klebsiella pneumoniae	miss	Homo sapiens	scaffold	USA	258	GCA_001032445.1_Kleb_pneu_CHS177_V1_genomic.fna
Klebsiella pneumoniae	miss	Homo sapiens	scaffold	USA	258	GCA_001032455.1_Kleb_pneu_CHS179_V1_genomic.fna
Klebsiella pneumoniae	miss	Homo sapiens	scaffold	USA	258	GCA_001032505.1_Kleb_pneu_CHS181_V1_genomic.fna
Klebsiella pneumoniae	miss	Homo sapiens	scaffold	USA	258	GCA_001032525.1_Kleb_pneu_CHS182_V1_genomic.fna
Klebsiella pneumoniae	miss	Homo sapiens	scaffold	USA	258	GCA_001032535.1_Kleb_pneu_CHS183_V1_genomic.fna
Klebsiella pneumoniae	miss	Homo sapiens	scaffold	USA	258	GCA_001032545.1_Kleb_pneu_CHS184_V1_genomic.fna
Klebsiella pneumoniae	miss	Homo sapiens	scaffold	USA	258	GCA_001032585.1_Kleb_pneu_CHS185_V1_genomic.fna
Klebsiella pneumoniae	miss	Homo sapiens	scaffold	USA	258	GCA_001032605.1_Kleb_pneu_CHS186_V1_genomic.fna
Klebsiella pneumoniae	miss	Homo sapiens	scaffold	USA	258	GCA_001032615.1_Kleb_pneu_CHS189_V1_genomic.fna
Klebsiella pneumoniae	miss	Homo sapiens	scaffold	USA	258	GCA_001032625.1_Kleb_pneu_CHS191_V1_genomic.fna
Klebsiella pneumoniae	miss	Homo sapiens	scaffold	USA	258	GCA_001032665.1_Kleb_pneu_CHS192_V1_genomic.fna
Klebsiella pneumoniae	miss	Homo sapiens	scaffold	USA	258	GCA_001032685.1_Kleb_pneu_CHS194_V1_genomic.fna
Klebsiella pneumoniae	miss	Homo sapiens	scaffold	USA	258	GCA_001032695.1_Kleb_pneu_CHS195_V1_genomic.fna
Klebsiella pneumoniae	miss	Homo sapiens	scaffold	USA	258	GCA_001032705.1_Kleb_pneu_CHS197_V1_genomic.fna
Klebsiella pneumoniae	miss	Homo sapiens	scaffold	USA	258	GCA_001032765.1_Kleb_pneu_CHS200_V1_genomic.fna
Klebsiella pneumoniae	miss	Homo sapiens	scaffold	USA	-	GCA_001032775.1_Kleb_pneu_CHS201_V1_genomic.fna
Klebsiella pneumoniae	miss	Homo sapiens	scaffold	USA	258	GCA_001032795.1_Kleb_pneu_CHS202_V1_genomic.fna
Klebsiella pneumoniae	miss	Homo sapiens	scaffold	USA	258	GCA_001032815.1_Kleb_pneu_CHS205_V1_genomic.fna
Klebsiella pneumoniae	miss	Homo sapiens	scaffold	USA	2121	GCA_001032845.1_Kleb_pneu_CHS206_V1_genomic.fna
Klebsiella pneumoniae	miss	Homo sapiens	scaffold	USA	258	GCA_001032855.1_Kleb_pneu_CHS207_V1_genomic.fna
Klebsiella pneumoniae	miss	Homo sapiens	scaffold	USA	11	GCA_001032875.1_Kleb_pneu_CHS208_V1_genomic.fna
Klebsiella pneumoniae	miss	Homo sapiens	scaffold	USA	258	GCA_001032895.1_Kleb_pneu_CHS209_V1_genomic.fna
Klebsiella pneumoniae	miss	Homo sapiens	scaffold	USA	258	GCA_001032925.1_Kleb_pneu_CHS210_V1_genomic.fna
Klebsiella pneumoniae	miss	Homo sapiens	scaffold	USA	-	GCA_001032935.1_Kleb_pneu_CHS211_V1_genomic.fna
Klebsiella pneumoniae	miss	Homo sapiens	scaffold	USA	258	GCA_001032965.1_Kleb_pneu_CHS213_V1_genomic.fna
Klebsiella pneumoniae	miss	Homo sapiens	scaffold	USA	258	GCA_001032975.1_Kleb_pneu_CHS214_V1_genomic.fna
Klebsiella pneumoniae	miss	Homo sapiens	scaffold	USA	258	GCA_001033005.1_Kleb_pneu_CHS215_V1_genomic.fna
Klebsiella pneumoniae	miss	Homo sapiens	scaffold	USA	258	GCA_001033015.1_Kleb_pneu_CHS216_V1_genomic.fna
Klebsiella pneumoniae	miss	Homo sapiens	scaffold	USA	258	GCA_001033045.1_Kleb_pneu_CHS217_V1_genomic.fna
Klebsiella pneumoniae	miss	Homo sapiens	scaffold	USA	258	GCA_001033055.1_Kleb_pneu_CHS218_V1_genomic.fna
Klebsiella pneumoniae	miss	Homo sapiens	scaffold	USA	258	GCA_001033085.1_Kleb_pneu_CHS219_V1_genomic.fna
Klebsiella pneumoniae	miss	Homo sapiens	scaffold	USA	258	GCA_001033095.1_Kleb_pneu_CHS220_V1_genomic.fna
Klebsiella pneumoniae	miss	Homo sapiens	scaffold	USA	258	GCA_001033125.1_Kleb_pneu_CHS221_V1_genomic.fna
Klebsiella pneumoniae	miss	Homo sapiens	scaffold	USA	258	GCA_001033135.1_Kleb_pneu_CHS223_V1_genomic.fna
Klebsiella pneumoniae	miss	Homo sapiens	scaffold	USA	258	GCA_001033165.1_Kleb_pneu_CHS224_V1_genomic.fna
Klebsiella pneumoniae	miss	Homo sapiens	scaffold	USA	258	GCA_001033175.1_Kleb_pneu_CHS225_V1_genomic.fna
Klebsiella pneumoniae	miss	Homo sapiens	scaffold	USA	258	GCA_001033205.1_Kleb_pneu_CHS226_V1_genomic.fna
Klebsiella pneumoniae	miss	Homo sapiens	scaffold	USA	258	GCA_001033215.1_Kleb_pneu_CHS228_V1_genomic.fna
Klebsiella pneumoniae	miss	Homo sapiens	scaffold	USA	11	GCA_001033245.1_Kleb_pneu_CHS229_V1_genomic.fna
Klebsiella pneumoniae	miss	Homo sapiens	scaffold	USA	258	GCA_001033255.1_Kleb_pneu_CHS230_V1_genomic.fna
Klebsiella pneumoniae	miss	Homo sapiens	scaffold	USA	258	GCA_001033285.1_Kleb_pneu_CHS231_V1_genomic.fna
Klebsiella pneumoniae	miss	Homo sapiens	scaffold	USA	258	GCA_001033295.1_Kleb_pneu_CHS232_V1_genomic.fna
Klebsiella pneumoniae	miss	Homo sapiens	scaffold	USA	258	GCA_001033305.1_Kleb_pneu_CHS234_V1_genomic.fna
Klebsiella pneumoniae	miss	Homo sapiens	scaffold	USA	258	GCA_001033335.1_Kleb_pneu_CHS235_V1_genomic.fna
Klebsiella pneumoniae	miss	Homo sapiens	scaffold	USA	258	GCA_001033365.1_Kleb_pneu_CHS236_V1_genomic.fna
Klebsiella pneumoniae	miss	Homo sapiens	scaffold	USA	258	GCA_001033375.1_Kleb_pneu_CHS237_V1_genomic.fna
Klebsiella pneumoniae	miss	Homo sapiens	scaffold	USA	258	GCA_001033385.1_Kleb_pneu_BWH53_V1_genomic.fna
Klebsiella pneumoniae	miss	Homo sapiens	scaffold	USA	16	GCA_001033415.1_Kleb_pneu_BWH58_V1_genomic.fna
Klebsiella pneumoniae	miss	Homo sapiens	scaffold	USA	25	GCA_001033445.1_Kleb_pneu_BWH62_V1_genomic.fna
Klebsiella pneumoniae	miss	Homo sapiens	scaffold	USA	3191	GCA_001052475.1_ASM105247v1_genomic.fna
Klebsiella pneumoniae subsp. pneumoniae	miss	Homo sapiens	scaffold	USA	70	GCA_001052515.1_ASM105251v1_genomic.fna
Klebsiella pneumoniae subsp. pneumoniae	miss	Homo sapiens	scaffold	USA	25	GCA_001055015.1_ASM105501v1_genomic.fna
Klebsiella pneumoniae subsp. pneumoniae	miss	Homo sapiens	scaffold	USA	-	GCA_001056275.1_ASM105627v1_genomic.fna
Klebsiella pneumoniae subsp. ozaenae	miss	Homo sapiens	scaffold	USA	60	GCA_001056485.1_ASM105648v1_genomic.fna
Klebsiella pneumoniae subsp. pneumoniae	miss	Homo sapiens	scaffold	USA	528	GCA_001058365.1_ASM105836v1_genomic.fna
Klebsiella pneumoniae	miss	Homo sapiens	scaffold	USA	846	GCA_001060105.1_ASM106010v1_genomic.fna
Klebsiella pneumoniae	miss	Homo sapiens	scaffold	USA	-	GCA_001060275.1_ASM106027v1_genomic.fna
Klebsiella pneumoniae	miss	Homo sapiens	scaffold	USA	327	GCA_001060495.1_ASM106049v1_genomic.fna
Klebsiella pneumoniae	miss	Homo sapiens	scaffold	USA	253	GCA_001060895.1_ASM106089v1_genomic.fna
Klebsiella pneumoniae	miss	Homo sapiens	scaffold	USA	3191	GCA_001061315.1_ASM106131v1_genomic.fna
Klebsiella pneumoniae	miss	Homo sapiens	scaffold	USA	278	GCA_001061605.1_ASM106160v1_genomic.fna
Klebsiella pneumoniae	miss	Homo sapiens	scaffold	USA	846	GCA_001061725.1_ASM106172v1_genomic.fna
Klebsiella pneumoniae subsp. pneumoniae	miss	Homo sapiens	scaffold	USA	36	GCA_001061805.1_ASM106180v1_genomic.fna
Klebsiella pneumoniae	miss	Homo sapiens	scaffold	USA	184	GCA_001062535.1_ASM106253v1_genomic.fna
Klebsiella pneumoniae	miss	Homo sapiens	scaffold	USA	-	GCA_001062915.1_ASM106291v1_genomic.fna
Klebsiella pneumoniae	miss	Homo sapiens	scaffold	USA	2970	GCA_001063525.1_ASM106352v1_genomic.fna
Klebsiella pneumoniae	miss	Homo sapiens	scaffold	USA	461	GCA_001063755.1_ASM106375v1_genomic.fna
Klebsiella pneumoniae	miss	Homo sapiens	scaffold	USA	2333	GCA_001063935.1_ASM106393v1_genomic.fna
Klebsiella pneumoniae	miss	Homo sapiens	scaffold	USA	-	GCA_001064035.1_ASM106403v1_genomic.fna
Klebsiella pneumoniae	miss	Homo sapiens	scaffold	USA	323	GCA_001064955.1_ASM106495v1_genomic.fna
Klebsiella pneumoniae	miss	Homo sapiens	scaffold	USA	2970	GCA_001065235.1_ASM106523v1_genomic.fna
Klebsiella pneumoniae	miss	Homo sapiens	scaffold	USA	-	GCA_001066585.1_ASM106658v1_genomic.fna
Klebsiella pneumoniae	miss	Homo sapiens	scaffold	USA	234	GCA_001067135.1_ASM106713v1_genomic.fna
Klebsiella pneumoniae subsp. pneumoniae	miss	Homo sapiens	scaffold	USA	34	GCA_001076675.1_ASM107667v1_genomic.fna
Klebsiella pneumoniae	miss	Homo sapiens	scaffold	USA	258	GCA_001185675.1_Kleb_pneu_CHS240_V1_genomic.fna
Klebsiella pneumoniae	miss	Homo sapiens	scaffold	USA	258	GCA_001185695.1_Kleb_pneu_CHS239_V1_genomic.fna
Klebsiella pneumoniae	miss	Homo sapiens	scaffold	USA	258	GCA_001185745.1_Kleb_pneu_CHS238_V1_genomic.fna
Klebsiella pneumoniae	miss	Homo sapiens	scaffold	USA	258	GCA_001185755.1_Kleb_pneu_CHS212_V1_genomic.fna
Klebsiella pneumoniae	miss	Homo sapiens	scaffold	USA	258	GCA_001185765.1_Kleb_pneu_CHS198_V1_genomic.fna
Klebsiella pneumoniae	miss	Homo sapiens	scaffold	USA	258	GCA_001185775.1_Kleb_pneu_CHS196_V1_genomic.fna
Klebsiella pneumoniae	miss	Homo sapiens	scaffold	USA	258	GCA_001185825.1_Kleb_pneu_CHS187_V1_genomic.fna
Klebsiella pneumoniae	miss	Homo sapiens	scaffold	USA	258	GCA_001185835.1_Kleb_pneu_CHS178_V1_genomic.fna
Klebsiella pneumoniae	miss	Homo sapiens	scaffold	USA	14	GCA_001185865.1_Kleb_pneu_CHS175_V1_genomic.fna
Klebsiella pneumoniae	miss	Homo sapiens	scaffold	USA	258	GCA_001185895.1_Kleb_pneu_CHS171_V1_genomic.fna
Klebsiella pneumoniae	miss	Homo sapiens	scaffold	USA	-	GCA_001185915.1_Kleb_pneu_CHS136_V1_genomic.fna
Klebsiella pneumoniae	miss	Homo sapiens	scaffold	USA	258	GCA_001185925.1_Kleb_pneu_CHS130_V1_genomic.fna
Klebsiella pneumoniae	miss	Homo sapiens	scaffold	USA	258	GCA_001185945.1_Kleb_pneu_CHS124_V1_genomic.fna
Klebsiella pneumoniae	miss	Homo sapiens	scaffold	USA	258	GCA_001185955.1_Kleb_pneu_CHS120_V1_genomic.fna
Klebsiella pneumoniae	miss	Homo sapiens	scaffold	USA	258	GCA_001185985.1_Kleb_pneu_CHS119_V1_genomic.fna
Klebsiella pneumoniae	miss	Homo sapiens	scaffold	USA	258	GCA_001186005.1_Kleb_pneu_CHS108_V1_genomic.fna
Klebsiella pneumoniae	miss	Homo sapiens	scaffold	USA	258	GCA_001186025.1_Kleb_pneu_CHS103_V1_genomic.fna
Klebsiella pneumoniae	miss	Homo sapiens	scaffold	USA	258	GCA_001186035.1_Kleb_pneu_CHS87_V1_genomic.fna
Klebsiella pneumoniae	miss	Homo sapiens	scaffold	USA	11	GCA_001186065.1_Kleb_pneu_CHS86_V1_genomic.fna
Klebsiella pneumoniae	urine	Homo sapiens	scaffold	Australia	258	GCA_001238585.1_ASM123858v1_genomic.fna
Klebsiella pneumoniae	blood	Homo sapiens	scaffold	Israel	11	GCA_001441285.1_ASM144128v1_genomic.fna
Klebsiella pneumoniae	blood	Homo sapiens	scaffold	Israel	327	GCA_001441295.1_ASM144129v1_genomic.fna
Klebsiella pneumoniae	urine	Homo sapiens	scaffold	Netherlands	1427	GCA_001457255.1_ASM145725v1_genomic.fna
Klebsiella pneumoniae	urine	Homo sapiens	scaffold	Netherlands	1427	GCA_001457265.1_ASM145726v1_genomic.fna
Klebsiella pneumoniae	Central venous line	Homo sapiens	scaffold	Netherlands	1427	GCA_001457275.1_ASM145727v1_genomic.fna
Klebsiella pneumoniae	Perineum	Homo sapiens	scaffold	Netherlands	1782	GCA_001460505.1_ASM146050v1_genomic.fna
Klebsiella pneumoniae	sputum	Homo sapiens	scaffold	Netherlands	1427	GCA_001460565.1_ASM146056v1_genomic.fna
Klebsiella pneumoniae	blood	Homo sapiens	scaffold	Netherlands	927	GCA_001460575.1_ASM146057v1_genomic.fna
Klebsiella pneumoniae	throat	Homo sapiens	scaffold	Netherlands	1427	GCA_001460985.1_ASM146098v1_genomic.fna
Klebsiella pneumoniae	pleural fluid	Homo sapiens	scaffold	Denmark	35	GCA_001482645.1_ASM148264v1_genomic.fna
Klebsiella pneumoniae	Rectal	Homo sapiens	scaffold	Netherlands	258	GCA_001517725.1_ASM151772v1_genomic.fna
Klebsiella pneumoniae	rectal	Homo sapiens	scaffold	Netherlands	258	GCA_001517805.1_ASM151780v1_genomic.fna
Klebsiella pneumoniae	urine	Homo sapiens	scaffold	Saudi Arabia	14	GCA_001574505.1_ASM157450v1_genomic.fna
Klebsiella pneumoniae	Rectum	Homo sapiens	scaffold	Netherlands	15	GCA_001596905.1_ASM159690v1_genomic.fna
Klebsiella pneumoniae	rectum	Homo sapiens	scaffold	Netherlands	15	GCA_001596915.1_ASM159691v1_genomic.fna
Klebsiella pneumoniae	urine	Homo sapiens	scaffold	Netherlands	15	GCA_001596925.1_ASM159692v1_genomic.fna
Klebsiella pneumoniae	sputum	Homo sapiens	scaffold	Netherlands	15	GCA_001596935.1_ASM159693v1_genomic.fna
Klebsiella pneumoniae	urine	Homo sapiens	scaffold	Netherlands	15	GCA_001596985.1_ASM159698v1_genomic.fna
Klebsiella pneumoniae	blood	Homo sapiens	scaffold	Netherlands	15	GCA_001597015.1_ASM159701v1_genomic.fna
Klebsiella pneumoniae	blood	Homo sapiens	scaffold	Netherlands	437	GCA_001597065.1_ASM159706v1_genomic.fna
Klebsiella pneumoniae	blood	Homo sapiens	scaffold	Netherlands	307	GCA_001597075.1_ASM159707v1_genomic.fna
Klebsiella pneumoniae	rectum	Homo sapiens	scaffold	Netherlands	15	GCA_001597095.1_ASM159709v1_genomic.fna
Klebsiella pneumoniae	urine	Homo sapiens	scaffold	Netherlands	15	GCA_001597115.1_ASM159711v1_genomic.fna
Klebsiella pneumoniae	Rectum	Homo sapiens	scaffold	Netherlands	15	GCA_001597145.1_ASM159714v1_genomic.fna
Klebsiella pneumoniae	Rectum	Homo sapiens	scaffold	Netherlands	15	GCA_001597165.1_ASM159716v1_genomic.fna
Klebsiella pneumoniae	abdominal drainage	Homo sapiens	scaffold	China	11	GCA_001613565.1_ASM161356v1_genomic.fna
Klebsiella pneumoniae	nose	Homo sapiens	scaffold	China	11	GCA_001613575.1_ASM161357v1_genomic.fna
Klebsiella pneumoniae	nose	Homo sapiens	scaffold	China	11	GCA_001613585.1_ASM161358v1_genomic.fna
Klebsiella pneumoniae	sputum	Homo sapiens	scaffold	China	11	GCA_001613595.1_ASM161359v1_genomic.fna
Klebsiella pneumoniae	nose	Homo sapiens	scaffold	China	11	GCA_001613645.1_ASM161364v1_genomic.fna
Klebsiella pneumoniae	urine	Homo sapiens	scaffold	China	11	GCA_001613655.1_ASM161365v1_genomic.fna
Klebsiella pneumoniae	sputum	Homo sapiens	scaffold	China	11	GCA_001613665.1_ASM161366v1_genomic.fna
Klebsiella pneumoniae	sputum	Homo sapiens	scaffold	China	11	GCA_001613715.1_ASM161371v1_genomic.fna
Klebsiella pneumoniae	miss	Homo sapiens	scaffold	China	29	GCA_001630805.1_ASM163080v1_genomic.fna
Klebsiella pneumoniae	wound	Homo sapiens	scaffold	USA	48	GCA_001647455.1_ASM164745v1_genomic.fna
Klebsiella pneumoniae	blood	Homo sapiens	scaffold	USA	44	GCA_001647465.1_ASM164746v1_genomic.fna
Klebsiella pneumoniae	wound	Homo sapiens	scaffold	USA	11	GCA_001647475.1_ASM164747v1_genomic.fna
Klebsiella pneumoniae	blood	Homo sapiens	scaffold	India	-	GCA_001674985.1_ASM167498v1_genomic.fna
Klebsiella pneumoniae	Rectal swab	Homo sapiens	scaffold	Italy	512	GCA_001679915.1_ASM167991v1_genomic.fna
Klebsiella pneumoniae	sputum	Homo sapiens	scaffold	China	2316	GCA_001701575.1_ASM170157v1_genomic.fna
Klebsiella pneumoniae	sputum	Homo sapiens	scaffold	China	17	GCA_001701585.1_ASM170158v1_genomic.fna
Klebsiella pneumoniae	sputum	Homo sapiens	scaffold	China	17	GCA_001701615.1_ASM170161v1_genomic.fna
Klebsiella pneumoniae	sputum	Homo sapiens	scaffold	China	1798	GCA_001701625.1_ASM170162v1_genomic.fna
Klebsiella pneumoniae	sputum	Homo sapiens	scaffold	China	896	GCA_001701695.1_ASM170169v1_genomic.fna
Klebsiella pneumoniae	sputum	Homo sapiens	scaffold	China	290	GCA_001701705.1_ASM170170v1_genomic.fna
Klebsiella pneumoniae	sputum	Homo sapiens	scaffold	China	322	GCA_001701725.1_ASM170172v1_genomic.fna
Klebsiella pneumoniae	sputum	Homo sapiens	scaffold	China	875	GCA_001701755.1_ASM170175v1_genomic.fna
Klebsiella pneumoniae	sputum	Homo sapiens	scaffold	China	1522	GCA_001701765.1_ASM170176v1_genomic.fna
Klebsiella pneumoniae	sputum	Homo sapiens	scaffold	China	36	GCA_001701795.1_ASM170179v1_genomic.fna
Klebsiella pneumoniae	Femoral bone	Homo sapiens	scaffold	USA	23	GCA_001707135.1_ASM170713v1_genomic.fna
Klebsiella pneumoniae	catheter tip	Homo sapiens	scaffold	Brazil	340	GCA_001718115.1_ASM171811v1_genomic.fna
Klebsiella pneumoniae	blood	Homo sapiens	scaffold	India	-	GCA_001721545.1_ASM172154v1_genomic.fna
Klebsiella pneumoniae	blood	Homo sapiens	scaffold	India	147	GCA_001721555.1_ASM172155v1_genomic.fna
Klebsiella pneumoniae	blood	Homo sapiens	scaffold	India	23	GCA_001721585.1_ASM172158v1_genomic.fna
Klebsiella pneumoniae	blood	Homo sapiens	scaffold	India	14	GCA_001742865.1_ASM174286v1_genomic.fna
Klebsiella pneumoniae	rectal swab	Homo sapiens	scaffold	Brazil	-	GCA_001756835.2_ASM175683v2_genomic.fna
Klebsiella pneumoniae	blood	Homo sapiens	scaffold	India	23	GCA_001756905.1_ASM175690v1_genomic.fna
Klebsiella pneumoniae	blood	Homo sapiens	scaffold	India	231	GCA_001758405.1_ASM175840v1_genomic.fna
Klebsiella pneumoniae	blood	Homo sapiens	scaffold	India	43	GCA_001758485.1_ASM175848v1_genomic.fna
Klebsiella pneumoniae	blood	Homo sapiens	scaffold	India	11	GCA_001758505.1_ASM175850v1_genomic.fna
Klebsiella pneumoniae	blood	Homo sapiens	scaffold	India	-	GCA_001766695.1_ASM176669v1_genomic.fna
Klebsiella pneumoniae	blood	Homo sapiens	scaffold	India	-	GCA_001766715.1_ASM176671v1_genomic.fna
Klebsiella pneumoniae	blood	Homo sapiens	scaffold	India	-	GCA_001777135.1_ASM177713v1_genomic.fna
Klebsiella pneumoniae	blood	Homo sapiens	scaffold	China	11	GCA_001856585.1_ASM185658v1_genomic.fna
Klebsiella pneumoniae	central venous catheter	Homo sapiens	scaffold	China	11	GCA_001856605.1_ASM185660v1_genomic.fna
Klebsiella pneumoniae	urine	Homo sapiens	scaffold	China	11	GCA_001866785.1_ASM186678v1_genomic.fna
Klebsiella pneumoniae	blood	Homo sapiens	scaffold	India	231	GCA_001870615.1_ASM187061v1_genomic.fna
Klebsiella pneumoniae	blood	Homo sapiens	scaffold	India	231	GCA_001875525.1_ASM187552v1_genomic.fna
Klebsiella pneumoniae	blood	Homo sapiens	scaffold	India	14	GCA_001875535.1_ASM187553v1_genomic.fna
Klebsiella pneumoniae	blood	Homo sapiens	scaffold	India	231	GCA_001875545.1_ASM187554v1_genomic.fna
Klebsiella pneumoniae	blood	Homo sapiens	scaffold	India	231	GCA_001879315.1_ASM187931v1_genomic.fna
Klebsiella pneumoniae	blood	Homo sapiens	scaffold	India	-	GCA_001879325.1_ASM187932v1_genomic.fna
Klebsiella pneumoniae	pus	Homo sapiens	scaffold	India	231	GCA_001879335.1_ASM187933v1_genomic.fna
Klebsiella pneumoniae	blood	Homo sapiens	scaffold	India	-	GCA_001879345.1_ASM187934v1_genomic.fna
Klebsiella pneumoniae	urine	Homo sapiens	scaffold	India	11	GCA_001879395.1_ASM187939v1_genomic.fna
Klebsiella pneumoniae	blood	Homo sapiens	scaffold	India	11	GCA_001879405.1_ASM187940v1_genomic.fna
Klebsiella pneumoniae	bronchoalveolar lavage	Homo sapiens	scaffold	India	11	GCA_001879415.1_ASM187941v1_genomic.fna
Klebsiella pneumoniae	blood	Homo sapiens	scaffold	India	14	GCA_001879425.1_ASM187942v1_genomic.fna
Klebsiella pneumoniae	blood	Homo sapiens	scaffold	India	14	GCA_001891185.1_ASM189118v1_genomic.fna
Klebsiella pneumoniae	blood	Homo sapiens	scaffold	India	14	GCA_001901585.1_ASM190158v1_genomic.fna
Klebsiella pneumoniae	miss	Homo sapiens	scaffold	Switzerland	512	GCA_002085855.1_ASM208585v1_genomic.fna
Klebsiella pneumoniae	urine	Homo sapiens	scaffold	Switzerland	512	GCA_002085865.1_ASM208586v1_genomic.fna
Klebsiella pneumoniae subsp. pneumoniae	feces	Homo sapiens	scaffold	Switzerland	512	GCA_002085895.1_ASM208589v1_genomic.fna
Klebsiella pneumoniae subsp. pneumoniae	feces	Homo sapiens	scaffold	Switzerland	512	GCA_002085915.1_ASM208591v1_genomic.fna
Klebsiella pneumoniae subsp. pneumoniae	feces	Homo sapiens	scaffold	Switzerland	512	GCA_002085935.1_ASM208593v1_genomic.fna
Klebsiella pneumoniae subsp. pneumoniae	Blood culture	Homo sapiens	scaffold	Switzerland	512	GCA_002085975.1_ASM208597v1_genomic.fna
Klebsiella pneumoniae subsp. pneumoniae	Blood culture	Homo sapiens	scaffold	Switzerland	512	GCA_002085995.1_ASM208599v1_genomic.fna
Klebsiella pneumoniae subsp. pneumoniae	Blood culture	Homo sapiens	scaffold	Switzerland	512	GCA_002086005.1_ASM208600v1_genomic.fna
Klebsiella pneumoniae subsp. pneumoniae	Blood culture	Homo sapiens	scaffold	Switzerland	512	GCA_002086025.1_ASM208602v1_genomic.fna
Klebsiella pneumoniae	feces	Homo sapiens	scaffold	Switzerland	512	GCA_002086055.1_ASM208605v1_genomic.fna
Klebsiella pneumoniae subsp. pneumoniae	feces	Homo sapiens	scaffold	Switzerland	258	GCA_002086075.1_ASM208607v1_genomic.fna
Klebsiella pneumoniae subsp. pneumoniae	Catheter	Homo sapiens	scaffold	Switzerland	512	GCA_002086095.1_ASM208609v1_genomic.fna
Klebsiella pneumoniae	urine	Homo sapiens	scaffold	USA	611	GCA_002087495.1_ASM208749v1_genomic.fna
Klebsiella pneumoniae	urine	Homo sapiens	scaffold	USA	611	GCA_002087645.1_ASM208764v1_genomic.fna
Klebsiella pneumoniae	urine	Homo sapiens	scaffold	USA	611	GCA_002087715.1_ASM208771v1_genomic.fna
Klebsiella pneumoniae	miss	Homo sapiens	scaffold	Syria	101	GCA_002093155.1_ASM209315v1_genomic.fna
Klebsiella pneumoniae	urine	Homo sapiens	scaffold	Brazil	392	GCA_002099165.1_ASM209916v1_genomic.fna
Klebsiella pneumoniae	urine	Homo sapiens	scaffold	Portugal	15	GCA_002102635.1_ASM210263v1_genomic.fna
Klebsiella pneumoniae	neck	Homo sapiens	scaffold	Portugal	14	GCA_002102655.1_ASM210265v1_genomic.fna
Klebsiella pneumoniae	wound	Homo sapiens	scaffold	Portugal	14	GCA_002102665.1_ASM210266v1_genomic.fna
Klebsiella pneumoniae	urine	Homo sapiens	scaffold	USA	258	GCA_002103515.1_ASM210351v1_genomic.fna
Klebsiella pneumoniae	urine	Homo sapiens	scaffold	USA	258	GCA_002103525.1_ASM210352v1_genomic.fna
Klebsiella pneumoniae	wound	Homo sapiens	scaffold	USA	258	GCA_002103555.1_ASM210355v1_genomic.fna
Klebsiella pneumoniae	urine	Homo sapiens	scaffold	USA	258	GCA_002103565.1_ASM210356v1_genomic.fna
Klebsiella pneumoniae	wound	Homo sapiens	scaffold	USA	-	GCA_002103595.1_ASM210359v1_genomic.fna
Klebsiella pneumoniae	wound	Homo sapiens	scaffold	USA	258	GCA_002103605.1_ASM210360v1_genomic.fna
Klebsiella pneumoniae	blood	Homo sapiens	scaffold	USA	258	GCA_002103635.1_ASM210363v1_genomic.fna
Klebsiella pneumoniae	urine	Homo sapiens	scaffold	USA	258	GCA_002103645.1_ASM210364v1_genomic.fna
Klebsiella pneumoniae	urine	Homo sapiens	scaffold	USA	258	GCA_002103655.1_ASM210365v1_genomic.fna
Klebsiella pneumoniae	wound	Homo sapiens	scaffold	USA	258	GCA_002103675.1_ASM210367v1_genomic.fna
Klebsiella pneumoniae	sputum	Homo sapiens	scaffold	USA	258	GCA_002103715.1_ASM210371v1_genomic.fna
Klebsiella pneumoniae	wound	Homo sapiens	scaffold	USA	258	GCA_002103725.1_ASM210372v1_genomic.fna
Klebsiella pneumoniae	urine	Homo sapiens	scaffold	USA	258	GCA_002103735.1_ASM210373v1_genomic.fna
Klebsiella pneumoniae	urine	Homo sapiens	scaffold	USA	258	GCA_002103745.1_ASM210374v1_genomic.fna
Klebsiella pneumoniae	blood	Homo sapiens	scaffold	Brazil	437	GCA_002105205.2_ASM210520v2_genomic.fna
Klebsiella pneumoniae	urine	Homo sapiens	scaffold	Philippines	273	GCA_002108235.1_ASM210823v1_genomic.fna
Klebsiella pneumoniae	lumbar drain tip	Homo sapiens	scaffold	Philippines	273	GCA_002108245.1_ASM210824v1_genomic.fna
Klebsiella pneumoniae	endotracheal aspirate	Homo sapiens	scaffold	Philippines	147	GCA_002108275.1_ASM210827v1_genomic.fna
Klebsiella pneumoniae	cerebrospinal fluid	Homo sapiens	scaffold	Philippines	273	GCA_002108285.1_ASM210828v1_genomic.fna
Klebsiella pneumoniae	wound abscess	Homo sapiens	scaffold	Philippines	1	GCA_002108315.1_ASM210831v1_genomic.fna
Klebsiella pneumoniae	penile discharge	Homo sapiens	scaffold	Philippines	656	GCA_002108335.1_ASM210833v1_genomic.fna
Klebsiella pneumoniae	blood	Homo sapiens	scaffold	Philippines	1	GCA_002108345.1_ASM210834v1_genomic.fna
Klebsiella pneumoniae	urine	Homo sapiens	scaffold	Philippines	656	GCA_002108355.1_ASM210835v1_genomic.fna
Klebsiella pneumoniae	endotracheal aspirate	Homo sapiens	scaffold	Philippines	392	GCA_002108395.1_ASM210839v1_genomic.fna
Klebsiella pneumoniae	lumbar drain tip	Homo sapiens	scaffold	Philippines	273	GCA_002108405.1_ASM210840v1_genomic.fna
Klebsiella pneumoniae	cerebrospinal fluid	Homo sapiens	scaffold	Philippines	273	GCA_002108415.1_ASM210841v1_genomic.fna
Klebsiella pneumoniae	feces	Homo sapiens	scaffold	Russia	23	GCA_002114225.1_ASM211422v1_genomic.fna
Klebsiella pneumoniae	urine	Homo sapiens	scaffold	Tunisia	147	GCA_002140135.1_ASM214013v1_genomic.fna
Klebsiella pneumoniae	miss	Homo sapiens	scaffold	USA	307	GCA_002148835.1_ASM214883v1_genomic.fna
Klebsiella pneumoniae	urine	Homo sapiens	scaffold	Tunisia	15	GCA_002150645.1_ASM215064v1_genomic.fna
Klebsiella pneumoniae	nasal	Homo sapiens	scaffold	USA	16	GCA_002152355.1_ASM215235v1_genomic.fna
Klebsiella pneumoniae	urine	Homo sapiens	scaffold	USA	251	GCA_002152365.1_ASM215236v1_genomic.fna
Klebsiella pneumoniae	Tissue	Homo sapiens	scaffold	USA	29	GCA_002152395.1_ASM215239v1_genomic.fna
Klebsiella pneumoniae	miss	Homo sapiens	scaffold	USA	2147	GCA_002152405.1_ASM215240v1_genomic.fna
Klebsiella pneumoniae	miss	Homo sapiens	scaffold	USA	478	GCA_002152435.1_ASM215243v1_genomic.fna
Klebsiella pneumoniae	miss	Homo sapiens	scaffold	USA	628	GCA_002152445.1_ASM215244v1_genomic.fna
Klebsiella pneumoniae	miss	Homo sapiens	scaffold	USA	628	GCA_002152475.1_ASM215247v1_genomic.fna
Klebsiella pneumoniae	miss	Homo sapiens	scaffold	USA	258	GCA_002152485.1_ASM215248v1_genomic.fna
Klebsiella pneumoniae	miss	Homo sapiens	scaffold	USA	15	GCA_002152515.1_ASM215251v1_genomic.fna
Klebsiella pneumoniae	miss	Homo sapiens	scaffold	USA	14	GCA_002152525.1_ASM215252v1_genomic.fna
Klebsiella pneumoniae	miss	Homo sapiens	scaffold	USA	152	GCA_002152555.1_ASM215255v1_genomic.fna
Klebsiella pneumoniae	miss	Homo sapiens	scaffold	USA	628	GCA_002152565.1_ASM215256v1_genomic.fna
Klebsiella pneumoniae	miss	Homo sapiens	scaffold	USA	16	GCA_002152595.1_ASM215259v1_genomic.fna
Klebsiella pneumoniae	miss	Homo sapiens	scaffold	USA	-	GCA_002152605.1_ASM215260v1_genomic.fna
Klebsiella pneumoniae	miss	Homo sapiens	scaffold	USA	628	GCA_002152635.1_ASM215263v1_genomic.fna
Klebsiella pneumoniae	miss	Homo sapiens	scaffold	USA	45	GCA_002152655.1_ASM215265v1_genomic.fna
Klebsiella pneumoniae	miss	Homo sapiens	scaffold	USA	405	GCA_002152675.1_ASM215267v1_genomic.fna
Klebsiella pneumoniae	miss	Homo sapiens	scaffold	USA	309	GCA_002152685.1_ASM215268v1_genomic.fna
Klebsiella pneumoniae	miss	Homo sapiens	scaffold	USA	1037	GCA_002152695.1_ASM215269v1_genomic.fna
Klebsiella pneumoniae	miss	Homo sapiens	scaffold	USA	258	GCA_002152735.1_ASM215273v1_genomic.fna
Klebsiella pneumoniae	miss	Homo sapiens	scaffold	USA	258	GCA_002152755.1_ASM215275v1_genomic.fna
Klebsiella pneumoniae	miss	Homo sapiens	scaffold	USA	-	GCA_002152765.1_ASM215276v1_genomic.fna
Klebsiella pneumoniae	miss	Homo sapiens	scaffold	USA	1805	GCA_002152775.1_ASM215277v1_genomic.fna
Klebsiella pneumoniae	miss	Homo sapiens	scaffold	USA	258	GCA_002152815.1_ASM215281v1_genomic.fna
Klebsiella pneumoniae	miss	Homo sapiens	scaffold	USA	15	GCA_002152825.1_ASM215282v1_genomic.fna
Klebsiella pneumoniae	miss	Homo sapiens	scaffold	USA	659	GCA_002152865.1_ASM215286v1_genomic.fna
Klebsiella pneumoniae	Tissue	Homo sapiens	scaffold	USA	11	GCA_002153085.1_ASM215308v1_genomic.fna
Klebsiella pneumoniae	miss	Homo sapiens	scaffold	USA	258	GCA_002153105.1_ASM215310v1_genomic.fna
Klebsiella pneumoniae	miss	Homo sapiens	scaffold	USA	628	GCA_002153115.1_ASM215311v1_genomic.fna
Klebsiella pneumoniae	miss	Homo sapiens	scaffold	USA	432	GCA_002153155.1_ASM215315v1_genomic.fna
Klebsiella pneumoniae	miss	Homo sapiens	scaffold	USA	3321	GCA_002153165.1_ASM215316v1_genomic.fna
Klebsiella pneumoniae	miss	Homo sapiens	scaffold	USA	628	GCA_002153175.1_ASM215317v1_genomic.fna
Klebsiella pneumoniae	miss	Homo sapiens	scaffold	USA	258	GCA_002153215.1_ASM215321v1_genomic.fna
Klebsiella pneumoniae	miss	Homo sapiens	scaffold	USA	258	GCA_002153225.1_ASM215322v1_genomic.fna
Klebsiella pneumoniae	miss	Homo sapiens	scaffold	USA	23	GCA_002153255.1_ASM215325v1_genomic.fna
Klebsiella pneumoniae	miss	Homo sapiens	scaffold	USA	15	GCA_002153275.1_ASM215327v1_genomic.fna
Klebsiella pneumoniae	miss	Homo sapiens	scaffold	USA	515	GCA_002153285.1_ASM215328v1_genomic.fna
Klebsiella pneumoniae	miss	Homo sapiens	scaffold	USA	678	GCA_002153305.1_ASM215330v1_genomic.fna
Klebsiella pneumoniae	miss	Homo sapiens	scaffold	USA	258	GCA_002153315.1_ASM215331v1_genomic.fna
Klebsiella pneumoniae	miss	Homo sapiens	scaffold	USA	466	GCA_002163225.1_ASM216322v1_genomic.fna
Klebsiella pneumoniae	miss	Homo sapiens	scaffold	China	11	GCA_002164605.1_ASM216460v1_genomic.fna
Klebsiella pneumoniae	miss	Homo sapiens	scaffold	China	11	GCA_002164675.1_ASM216467v1_genomic.fna
Klebsiella pneumoniae	miss	Homo sapiens	scaffold	China	45	GCA_002164685.1_ASM216468v1_genomic.fna
Klebsiella pneumoniae	miss	Homo sapiens	scaffold	China	45	GCA_002164695.1_ASM216469v1_genomic.fna
Klebsiella pneumoniae	miss	Homo sapiens	scaffold	China	45	GCA_002164725.1_ASM216472v1_genomic.fna
Klebsiella pneumoniae	miss	Homo sapiens	scaffold	China	11	GCA_002164755.1_ASM216475v1_genomic.fna
Klebsiella pneumoniae	miss	Homo sapiens	scaffold	China	37	GCA_002164765.1_ASM216476v1_genomic.fna
Klebsiella pneumoniae	miss	Homo sapiens	scaffold	China	37	GCA_002164795.1_ASM216479v1_genomic.fna
Klebsiella pneumoniae	miss	Homo sapiens	scaffold	China	11	GCA_002164875.1_ASM216487v1_genomic.fna
Klebsiella pneumoniae	miss	Homo sapiens	scaffold	United Kingdom	307	GCA_002167025.1_ASM216702v1_genomic.fna
Klebsiella pneumoniae	swab	Homo sapiens	scaffold	United Kingdom	307	GCA_002167075.1_ASM216707v1_genomic.fna
Klebsiella pneumoniae	swab	Homo sapiens	scaffold	United Kingdom	-	GCA_002167115.1_ASM216711v1_genomic.fna
Klebsiella pneumoniae	urine	Homo sapiens	scaffold	Tunisia	15	GCA_002189165.1_ASM218916v1_genomic.fna
Klebsiella pneumoniae	urine	Homo sapiens	scaffold	Tunisia	147	GCA_002189175.1_ASM218917v1_genomic.fna
Klebsiella pneumoniae	urine	Homo sapiens	scaffold	Tunisia	15	GCA_002189185.1_ASM218918v1_genomic.fna
Klebsiella pneumoniae	urine	Homo sapiens	scaffold	Tunisia	101	GCA_002189245.1_ASM218924v1_genomic.fna
Klebsiella pneumoniae	urine	Homo sapiens	scaffold	Tunisia	15	GCA_002189345.1_ASM218934v1_genomic.fna
Klebsiella pneumoniae	urine	Homo sapiens	scaffold	Tunisia	11	GCA_002189385.1_ASM218938v1_genomic.fna
Klebsiella pneumoniae	broncoalveolar lavage	Homo sapiens	scaffold	Italy	307	GCA_002235035.1_ASM223503v1_genomic.fna
Klebsiella pneumoniae	sternal wound	Homo sapiens	scaffold	Italy	512	GCA_002235055.1_ASM223505v1_genomic.fna
Klebsiella pneumoniae	urine	Homo sapiens	scaffold	Italy	512	GCA_002235095.1_ASM223509v1_genomic.fna
Klebsiella pneumoniae	urine	Homo sapiens	scaffold	Italy	512	GCA_002235105.1_ASM223510v1_genomic.fna
Klebsiella pneumoniae	urine	Homo sapiens	scaffold	Italy	512	GCA_002235115.1_ASM223511v1_genomic.fna
Klebsiella pneumoniae	purulent material	Homo sapiens	scaffold	Italy	512	GCA_002235155.1_ASM223515v1_genomic.fna
Klebsiella pneumoniae	inguinal swab	Homo sapiens	scaffold	Italy	745	GCA_002235165.1_ASM223516v1_genomic.fna
Klebsiella pneumoniae	urine	Homo sapiens	scaffold	Italy	307	GCA_002235175.1_ASM223517v1_genomic.fna
Klebsiella pneumoniae	blood	Homo sapiens	scaffold	Italy	307	GCA_002235215.1_ASM223521v1_genomic.fna
Klebsiella pneumoniae	urine	Homo sapiens	scaffold	Italy	258	GCA_002235265.1_ASM223526v1_genomic.fna
Klebsiella pneumoniae	decubitus	Homo sapiens	scaffold	Italy	258	GCA_002235295.1_ASM223529v1_genomic.fna
Klebsiella pneumoniae	rectal swab	Homo sapiens	scaffold	Italy	512	GCA_002235315.1_ASM223531v1_genomic.fna
Klebsiella pneumoniae	urine	Homo sapiens	scaffold	Italy	258	GCA_002235355.1_ASM223535v1_genomic.fna
Klebsiella pneumoniae	urine	Homo sapiens	scaffold	Italy	512	GCA_002235375.1_ASM223537v1_genomic.fna
Klebsiella pneumoniae	broncoalveolar lavage	Homo sapiens	scaffold	Italy	512	GCA_002235395.1_ASM223539v1_genomic.fna
Klebsiella pneumoniae	urine	Homo sapiens	scaffold	Italy	512	GCA_002235415.1_ASM223541v1_genomic.fna
Klebsiella pneumoniae	blood	Homo sapiens	scaffold	Italy	512	GCA_002235455.1_ASM223545v1_genomic.fna
Klebsiella pneumoniae	perianal swab	Homo sapiens	scaffold	Italy	512	GCA_002235475.1_ASM223547v1_genomic.fna
Klebsiella pneumoniae	sputum	Homo sapiens	scaffold	Italy	512	GCA_002235615.1_ASM223561v1_genomic.fna
Klebsiella pneumoniae	broncoalveolar lavage	Homo sapiens	scaffold	Italy	258	GCA_002235635.1_ASM223563v1_genomic.fna
Klebsiella pneumoniae	surgical wound	Homo sapiens	scaffold	Italy	512	GCA_002235795.1_ASM223579v1_genomic.fna
Klebsiella pneumoniae	urine	Homo sapiens	scaffold	Italy	512	GCA_002235825.1_ASM223582v1_genomic.fna
Klebsiella pneumoniae	urine	Homo sapiens	scaffold	Italy	512	GCA_002235945.1_ASM223594v1_genomic.fna
Klebsiella pneumoniae	urine	Homo sapiens	scaffold	Italy	258	GCA_002235975.1_ASM223597v1_genomic.fna
Klebsiella pneumoniae	central venous catheter	Homo sapiens	scaffold	Italy	258	GCA_002235985.1_ASM223598v1_genomic.fna
Klebsiella pneumoniae	throat swab	Homo sapiens	scaffold	Italy	512	GCA_002236145.1_ASM223614v1_genomic.fna
Klebsiella pneumoniae	cutaneus swab	Homo sapiens	scaffold	Italy	512	GCA_002236155.1_ASM223615v1_genomic.fna
Klebsiella pneumoniae	Intra-abdominal drainage	Homo sapiens	scaffold	Italy	512	GCA_002236185.1_ASM223618v1_genomic.fna
Klebsiella pneumoniae	urine	Homo sapiens	scaffold	Italy	512	GCA_002236205.1_ASM223620v1_genomic.fna
Klebsiella pneumoniae	inguinal swab	Homo sapiens	scaffold	Italy	512	GCA_002236245.1_ASM223624v1_genomic.fna
Klebsiella pneumoniae	rectal swab	Homo sapiens	scaffold	Italy	512	GCA_002236265.1_ASM223626v1_genomic.fna
Klebsiella pneumoniae	broncoalveolar lavage	Homo sapiens	scaffold	Italy	512	GCA_002236275.1_ASM223627v1_genomic.fna
Klebsiella pneumoniae	urine	Homo sapiens	scaffold	Italy	512	GCA_002236305.1_ASM223630v1_genomic.fna
Klebsiella pneumoniae	urine	Homo sapiens	scaffold	Italy	512	GCA_002236315.1_ASM223631v1_genomic.fna
Klebsiella pneumoniae	sacral ulcer swab	Homo sapiens	scaffold	Italy	512	GCA_002236345.1_ASM223634v1_genomic.fna
Klebsiella pneumoniae	rectal swab	Homo sapiens	scaffold	Italy	512	GCA_002236405.1_ASM223640v1_genomic.fna
Klebsiella pneumoniae	urine	Homo sapiens	scaffold	Italy	512	GCA_002236425.1_ASM223642v1_genomic.fna
Klebsiella pneumoniae	miss	Homo sapiens	scaffold	China	15	GCA_002252415.1_ASM225241v1_genomic.fna
Klebsiella pneumoniae	miss	Homo sapiens	scaffold	China	16	GCA_002257775.1_ASM225777v1_genomic.fna
Klebsiella pneumoniae	miss	Homo sapiens	scaffold	China	1	GCA_002257785.1_ASM225778v1_genomic.fna
Klebsiella pneumoniae	miss	Homo sapiens	scaffold	China	11	GCA_002257845.1_ASM225784v1_genomic.fna
Klebsiella pneumoniae	miss	Homo sapiens	scaffold	China	15	GCA_002257855.1_ASM225785v1_genomic.fna
Klebsiella pneumoniae	miss	Homo sapiens	scaffold	China	16	GCA_002257875.1_ASM225787v1_genomic.fna
Klebsiella pneumoniae	miss	Homo sapiens	scaffold	China	11	GCA_002257925.1_ASM225792v1_genomic.fna
Klebsiella pneumoniae	miss	Homo sapiens	scaffold	China	2004	GCA_002257965.1_ASM225796v1_genomic.fna
Klebsiella pneumoniae	miss	Homo sapiens	scaffold	China	-	GCA_002257975.1_ASM225797v1_genomic.fna
Klebsiella pneumoniae	miss	Homo sapiens	scaffold	China	2004	GCA_002258005.1_ASM225800v1_genomic.fna
Klebsiella pneumoniae	miss	Homo sapiens	scaffold	China	11	GCA_002258015.1_ASM225801v1_genomic.fna
Klebsiella pneumoniae	miss	Homo sapiens	scaffold	China	11	GCA_002258045.1_ASM225804v1_genomic.fna
Klebsiella pneumoniae	miss	Homo sapiens	scaffold	China	394	GCA_002258085.1_ASM225808v1_genomic.fna
Klebsiella pneumoniae	miss	Homo sapiens	scaffold	China	11	GCA_002258115.1_ASM225811v1_genomic.fna
Klebsiella pneumoniae	miss	Homo sapiens	scaffold	China	726	GCA_002258155.1_ASM225815v1_genomic.fna
Klebsiella pneumoniae	miss	Homo sapiens	scaffold	China	1213	GCA_002258175.1_ASM225817v1_genomic.fna
Klebsiella pneumoniae	feces	Homo sapiens	scaffold	China	11	GCA_002261545.1_ASM226154v1_genomic.fna
Klebsiella pneumoniae	feces	Homo sapiens	scaffold	China	-	GCA_002261615.1_ASM226161v1_genomic.fna
Klebsiella pneumoniae	feces	Homo sapiens	scaffold	China	11	GCA_002261655.1_ASM226165v1_genomic.fna
Klebsiella pneumoniae	feces	Homo sapiens	scaffold	China	11	GCA_002261665.1_ASM226166v1_genomic.fna
Klebsiella pneumoniae	feces	Homo sapiens	scaffold	China	11	GCA_002261675.1_ASM226167v1_genomic.fna
Klebsiella pneumoniae	feces	Homo sapiens	scaffold	China	11	GCA_002261775.1_ASM226177v1_genomic.fna
Klebsiella pneumoniae	feces	Homo sapiens	scaffold	China	11	GCA_002261785.1_ASM226178v1_genomic.fna
Klebsiella pneumoniae	feces	Homo sapiens	scaffold	China	11	GCA_002262175.1_ASM226217v1_genomic.fna
Klebsiella pneumoniae	feces	Homo sapiens	scaffold	China	11	GCA_002262335.1_ASM226233v1_genomic.fna
Klebsiella pneumoniae	feces	Homo sapiens	scaffold	China	15	GCA_002262785.1_ASM226278v1_genomic.fna
Klebsiella pneumoniae	blood	Homo sapiens	scaffold	China	305	GCA_002269805.1_ASM226980v1_genomic.fna
Klebsiella pneumoniae	blood	Homo sapiens	scaffold	India	-	GCA_002285215.1_ASM228521v1_genomic.fna
Klebsiella pneumoniae	blood	Homo sapiens	scaffold	India	-	GCA_002286395.1_ASM228639v1_genomic.fna
Klebsiella pneumoniae	blood	Homo sapiens	scaffold	India	-	GCA_002286675.1_ASM228667v1_genomic.fna
Klebsiella pneumoniae	blood	Homo sapiens	scaffold	India	-	GCA_002287665.1_ASM228766v1_genomic.fna
Klebsiella pneumoniae	blood	Homo sapiens	scaffold	India	-	GCA_002287675.1_ASM228767v1_genomic.fna
Klebsiella pneumoniae	blood	Homo sapiens	scaffold	India	-	GCA_002288615.1_ASM228861v1_genomic.fna
Klebsiella pneumoniae	Rectal	Homo sapiens	scaffold	Singapore	2542	GCA_002288845.1_ASM228884v1_genomic.fna
Klebsiella pneumoniae	blood	Homo sapiens	scaffold	Brazil	340	GCA_002289105.1_ASM228910v1_genomic.fna
Klebsiella pneumoniae	peritoneal secretion	Homo sapiens	scaffold	Brazil	437	GCA_002289165.1_ASM228916v1_genomic.fna
Klebsiella pneumoniae	blood	Homo sapiens	scaffold	Brazil	11	GCA_002295145.1_ASM229514v1_genomic.fna
Klebsiella pneumoniae	rectal swab	Homo sapiens	scaffold	Brazil	11	GCA_002295185.1_ASM229518v1_genomic.fna
Klebsiella pneumoniae	miss	Homo sapiens	scaffold	India	-	GCA_002300655.1_ASM230065v1_genomic.fna
Klebsiella pneumoniae	blood	Homo sapiens	scaffold	India	48	GCA_002300665.1_ASM230066v1_genomic.fna
Klebsiella pneumoniae	blood	Homo sapiens	scaffold	Brazil	437	GCA_002300715.2_ASM230071v2_genomic.fna
Klebsiella pneumoniae	blood	Homo sapiens	scaffold	Brazil	11	GCA_002300725.2_ASM230072v2_genomic.fna
Klebsiella pneumoniae	urine	Homo sapiens	scaffold	Brazil	340	GCA_002300755.2_ASM230075v2_genomic.fna
Klebsiella pneumoniae	blood	Homo sapiens	scaffold	Brazil	11	GCA_002300765.2_ASM230076v2_genomic.fna
Klebsiella pneumoniae	blood	Homo sapiens	scaffold	Brazil	443	GCA_002300775.1_ASM230077v1_genomic.fna
Klebsiella pneumoniae	blood	Homo sapiens	scaffold	Brazil	437	GCA_002300785.2_ASM230078v2_genomic.fna
Klebsiella pneumoniae	miss	Homo sapiens	scaffold	China	11	GCA_002369875.1_ASM236987v1_genomic.fna
Klebsiella pneumoniae	miss	Homo sapiens	scaffold	China	11	GCA_002369905.1_ASM236990v1_genomic.fna
Klebsiella pneumoniae	sputum	Homo sapiens	scaffold	China	11	GCA_002370055.1_ASM237005v1_genomic.fna
Klebsiella pneumoniae	sputum	Homo sapiens	scaffold	China	11	GCA_002370065.1_ASM237006v1_genomic.fna
Klebsiella pneumoniae	blood	Homo sapiens	scaffold	India	231	GCA_002374295.1_ASM237429v1_genomic.fna
Klebsiella pneumoniae	blood	Homo sapiens	scaffold	India	-	GCA_002374325.1_ASM237432v1_genomic.fna
Klebsiella pneumoniae	blood	Homo sapiens	scaffold	India	231	GCA_002383765.1_ASM238376v1_genomic.fna
Klebsiella pneumoniae	blood	Homo sapiens	scaffold	India	231	GCA_002406545.1_ASM240654v1_genomic.fna
Klebsiella pneumoniae	blood	Homo sapiens	scaffold	India	395	GCA_002406555.1_ASM240655v1_genomic.fna
Klebsiella pneumoniae	blood	Homo sapiens	scaffold	India	231	GCA_002406585.1_ASM240658v1_genomic.fna
Klebsiella pneumoniae	blood	Homo sapiens	scaffold	India	231	GCA_002406605.1_ASM240660v1_genomic.fna
Klebsiella pneumoniae	blood	Homo sapiens	scaffold	India	231	GCA_002406625.1_ASM240662v1_genomic.fna
Klebsiella pneumoniae	blood	Homo sapiens	scaffold	India	395	GCA_002406905.1_ASM240690v1_genomic.fna
Klebsiella pneumoniae	miss	Homo sapiens	scaffold	India	147	GCA_002406915.1_ASM240691v1_genomic.fna
Klebsiella pneumoniae	miss	Homo sapiens	scaffold	India	231	GCA_002406945.1_ASM240694v1_genomic.fna
Klebsiella pneumoniae	miss	Homo sapiens	scaffold	India	231	GCA_002406965.1_ASM240696v1_genomic.fna
Klebsiella pneumoniae	miss	Homo sapiens	scaffold	India	231	GCA_002406975.1_ASM240697v1_genomic.fna
Klebsiella pneumoniae	miss	Homo sapiens	scaffold	India	231	GCA_002406995.1_ASM240699v1_genomic.fna
Klebsiella pneumoniae	feces	Homo sapiens	scaffold	Switzerland	2261	GCA_002412175.1_ASM241217v1_genomic.fna
Klebsiella pneumoniae	urine	Homo sapiens	scaffold	South Africa	-	GCA_002417155.1_ASM241715v1_genomic.fna
Klebsiella pneumoniae	Pus	Homo sapiens	scaffold	India	13	GCA_002530545.1_ASM253054v1_genomic.fna
Klebsiella pneumoniae	blood	Homo sapiens	scaffold	India	231	GCA_002724125.1_ASM272412v1_genomic.fna
Klebsiella pneumoniae	bronchial aspirate	Homo sapiens	scaffold	Romania	-	GCA_002738115.1_ASM273811v1_genomic.fna
Klebsiella pneumoniae	blood	Homo sapiens	scaffold	India	-	GCA_002738325.1_ASM273832v1_genomic.fna
Klebsiella pneumoniae	blood	Homo sapiens	scaffold	China	11	GCA_002740615.1_ASM274061v1_genomic.fna
Klebsiella pneumoniae	blood	Homo sapiens	scaffold	China	11	GCA_002740625.1_ASM274062v1_genomic.fna
Klebsiella pneumoniae	blood	Homo sapiens	scaffold	China	11	GCA_002740645.1_ASM274064v1_genomic.fna
Klebsiella pneumoniae	blood	Homo sapiens	scaffold	China	34	GCA_002740705.1_ASM274070v1_genomic.fna
Klebsiella pneumoniae	abdominal drainage	Homo sapiens	scaffold	China	11	GCA_002751175.1_ASM275117v1_genomic.fna
Klebsiella pneumoniae	bronchoalveolar lavage fluid	Homo sapiens	scaffold	China	11	GCA_002751185.1_ASM275118v1_genomic.fna
Klebsiella pneumoniae	sputum	Homo sapiens	scaffold	China	11	GCA_002751195.1_ASM275119v1_genomic.fna
Klebsiella pneumoniae	secretion	Homo sapiens	scaffold	China	11	GCA_002751235.1_ASM275123v1_genomic.fna
Klebsiella pneumoniae	sputum	Homo sapiens	scaffold	China	11	GCA_002751295.1_ASM275129v1_genomic.fna
Klebsiella pneumoniae	Rectal	Homo sapiens	scaffold	Singapore	2542	GCA_002752865.1_ASM275286v1_genomic.fna
Klebsiella pneumoniae	Pig-tail ureteric stent	Homo sapiens	scaffold	Greece	11	GCA_002759035.1_ASM275903v1_genomic.fna
Klebsiella pneumoniae	blood	Homo sapiens	scaffold	India	-	GCA_002762635.1_ASM276263v1_genomic.fna
Klebsiella pneumoniae subsp. pneumoniae	bone	Homo sapiens	scaffold	France	307	GCA_002807065.1_ASM280706v1_genomic.fna
Klebsiella pneumoniae	miss	Homo sapiens	scaffold	China	11	GCA_002811265.1_ASM281126v1_genomic.fna
Klebsiella pneumoniae	miss	Homo sapiens	scaffold	China	11	GCA_002811275.1_ASM281127v1_genomic.fna
Klebsiella pneumoniae	miss	Homo sapiens	scaffold	China	45	GCA_002811365.1_ASM281136v1_genomic.fna
Klebsiella pneumoniae	miss	Homo sapiens	scaffold	China	11	GCA_002811375.1_ASM281137v1_genomic.fna
Klebsiella pneumoniae	miss	Homo sapiens	scaffold	China	45	GCA_002811385.1_ASM281138v1_genomic.fna
Klebsiella pneumoniae	miss	Homo sapiens	scaffold	China	45	GCA_002811425.1_ASM281142v1_genomic.fna
Klebsiella pneumoniae	miss	Homo sapiens	scaffold	China	45	GCA_002811615.1_ASM281161v1_genomic.fna
Klebsiella pneumoniae	miss	Homo sapiens	scaffold	China	340	GCA_002811735.1_ASM281173v1_genomic.fna
Klebsiella pneumoniae	blood	Homo sapiens	scaffold	India	-	GCA_002844785.1_ASM284478v1_genomic.fna
Klebsiella pneumoniae	miss	Homo sapiens	scaffold	China	11	GCA_002844865.1_ASM284486v1_genomic.fna
Klebsiella pneumoniae	miss	Homo sapiens	scaffold	China	11	GCA_002844875.1_ASM284487v1_genomic.fna
Klebsiella pneumoniae	miss	Homo sapiens	scaffold	China	11	GCA_002844905.1_ASM284490v1_genomic.fna
Klebsiella pneumoniae	miss	Homo sapiens	scaffold	China	11	GCA_002844925.1_ASM284492v1_genomic.fna
Klebsiella pneumoniae	miss	Homo sapiens	scaffold	China	11	GCA_002844935.1_ASM284493v1_genomic.fna
Klebsiella pneumoniae	miss	Homo sapiens	scaffold	China	11	GCA_002844965.1_ASM284496v1_genomic.fna
Klebsiella pneumoniae	miss	Homo sapiens	scaffold	China	11	GCA_002844975.1_ASM284497v1_genomic.fna
Klebsiella pneumoniae	miss	Homo sapiens	scaffold	China	11	GCA_002844985.1_ASM284498v1_genomic.fna
Klebsiella pneumoniae	miss	Homo sapiens	scaffold	China	11	GCA_002844995.1_ASM284499v1_genomic.fna
Klebsiella pneumoniae	miss	Homo sapiens	scaffold	China	11	GCA_002845045.1_ASM284504v1_genomic.fna
Klebsiella pneumoniae	miss	Homo sapiens	scaffold	China	11	GCA_002845065.1_ASM284506v1_genomic.fna
Klebsiella pneumoniae	miss	Homo sapiens	scaffold	China	11	GCA_002845075.1_ASM284507v1_genomic.fna
Klebsiella pneumoniae	miss	Homo sapiens	scaffold	China	11	GCA_002845095.1_ASM284509v1_genomic.fna
Klebsiella pneumoniae	miss	Homo sapiens	scaffold	China	11	GCA_002845125.1_ASM284512v1_genomic.fna
Klebsiella pneumoniae	miss	Homo sapiens	scaffold	China	11	GCA_002845135.1_ASM284513v1_genomic.fna
Klebsiella pneumoniae	miss	Homo sapiens	scaffold	China	11	GCA_002845145.1_ASM284514v1_genomic.fna
Klebsiella pneumoniae	miss	Homo sapiens	scaffold	China	11	GCA_002845185.1_ASM284518v1_genomic.fna
Klebsiella pneumoniae	miss	Homo sapiens	scaffold	China	11	GCA_002845205.1_ASM284520v1_genomic.fna
Klebsiella pneumoniae	miss	Homo sapiens	scaffold	China	11	GCA_002845225.1_ASM284522v1_genomic.fna
Klebsiella pneumoniae	miss	Homo sapiens	scaffold	China	11	GCA_002845235.1_ASM284523v1_genomic.fna
Klebsiella pneumoniae	miss	Homo sapiens	scaffold	China	11	GCA_002845265.1_ASM284526v1_genomic.fna
Klebsiella pneumoniae	miss	Homo sapiens	scaffold	China	11	GCA_002845285.1_ASM284528v1_genomic.fna
Klebsiella pneumoniae	miss	Homo sapiens	scaffold	China	11	GCA_002845315.1_ASM284531v1_genomic.fna
Klebsiella pneumoniae	miss	Homo sapiens	scaffold	China	11	GCA_002845345.1_ASM284534v1_genomic.fna
Klebsiella pneumoniae	miss	Homo sapiens	scaffold	Bangladesh	152	GCA_002848835.1_ASM284883v1_genomic.fna
Klebsiella pneumoniae	blood	Homo sapiens	scaffold	India	147	GCA_002849305.1_ASM284930v1_genomic.fna
Klebsiella pneumoniae	blood	Homo sapiens	scaffold	India	231	GCA_002849455.1_ASM284945v1_genomic.fna
Klebsiella pneumoniae	blood	Homo sapiens	scaffold	India	14	GCA_002849465.1_ASM284946v1_genomic.fna
Klebsiella pneumoniae	blood	Homo sapiens	scaffold	India	231	GCA_002849475.1_ASM284947v1_genomic.fna
Klebsiella pneumoniae subsp. ozaenae	miss	Homo sapiens	scaffold	China	23	GCA_002851855.1_ASM285185v1_genomic.fna
Klebsiella pneumoniae subsp. pneumoniae	miss	Homo sapiens	scaffold	China	11	GCA_002851875.1_ASM285187v1_genomic.fna
Klebsiella pneumoniae subsp. pneumoniae	miss	Homo sapiens	scaffold	China	1640	GCA_002851905.1_ASM285190v1_genomic.fna
Klebsiella pneumoniae subsp. pneumoniae	miss	Homo sapiens	scaffold	China	11	GCA_002851935.1_ASM285193v1_genomic.fna
Klebsiella pneumoniae subsp. pneumoniae	miss	Homo sapiens	scaffold	China	11	GCA_002851955.1_ASM285195v1_genomic.fna
Klebsiella pneumoniae subsp. pneumoniae	miss	Homo sapiens	scaffold	China	11	GCA_002851975.1_ASM285197v1_genomic.fna
Klebsiella pneumoniae subsp. pneumoniae	miss	Homo sapiens	scaffold	China	11	GCA_002851995.1_ASM285199v1_genomic.fna
Klebsiella pneumoniae subsp. pneumoniae	miss	Homo sapiens	scaffold	China	11	GCA_002852015.1_ASM285201v1_genomic.fna
Klebsiella pneumoniae subsp. ozaenae	miss	Homo sapiens	scaffold	China	700	GCA_002852035.1_ASM285203v1_genomic.fna
Klebsiella pneumoniae subsp. pneumoniae	miss	Homo sapiens	scaffold	China	11	GCA_002852055.1_ASM285205v1_genomic.fna
Klebsiella pneumoniae subsp. ozaenae	miss	Homo sapiens	scaffold	China	700	GCA_002852065.1_ASM285206v1_genomic.fna
Klebsiella pneumoniae subsp. pneumoniae	miss	Homo sapiens	scaffold	China	45	GCA_002852095.1_ASM285209v1_genomic.fna
Klebsiella pneumoniae subsp. pneumoniae	miss	Homo sapiens	scaffold	China	11	GCA_002852105.1_ASM285210v1_genomic.fna
Klebsiella pneumoniae subsp. pneumoniae	miss	Homo sapiens	scaffold	China	11	GCA_002852135.1_ASM285213v1_genomic.fna
Klebsiella pneumoniae subsp. pneumoniae	miss	Homo sapiens	scaffold	China	11	GCA_002852155.1_ASM285215v1_genomic.fna
Klebsiella pneumoniae subsp. pneumoniae	miss	Homo sapiens	scaffold	China	11	GCA_002852175.1_ASM285217v1_genomic.fna
Klebsiella pneumoniae subsp. pneumoniae	miss	Homo sapiens	scaffold	China	11	GCA_002852195.1_ASM285219v1_genomic.fna
Klebsiella pneumoniae subsp. pneumoniae	miss	Homo sapiens	scaffold	China	11	GCA_002852215.1_ASM285221v1_genomic.fna
Klebsiella pneumoniae subsp. pneumoniae	miss	Homo sapiens	scaffold	China	11	GCA_002852235.1_ASM285223v1_genomic.fna
Klebsiella pneumoniae subsp. pneumoniae	miss	Homo sapiens	scaffold	China	11	GCA_002852245.1_ASM285224v1_genomic.fna
Klebsiella pneumoniae subsp. pneumoniae	miss	Homo sapiens	scaffold	China	11	GCA_002852275.1_ASM285227v1_genomic.fna
Klebsiella pneumoniae subsp. pneumoniae	miss	Homo sapiens	scaffold	China	11	GCA_002852285.1_ASM285228v1_genomic.fna
Klebsiella pneumoniae subsp. pneumoniae	miss	Homo sapiens	scaffold	China	11	GCA_002852315.1_ASM285231v1_genomic.fna
Klebsiella pneumoniae subsp. pneumoniae	miss	Homo sapiens	scaffold	China	661	GCA_002852325.1_ASM285232v1_genomic.fna
Klebsiella pneumoniae subsp. pneumoniae	miss	Homo sapiens	scaffold	China	11	GCA_002852355.1_ASM285235v1_genomic.fna
Klebsiella pneumoniae subsp. pneumoniae	miss	Homo sapiens	scaffold	China	11	GCA_002852395.1_ASM285239v1_genomic.fna
Klebsiella pneumoniae subsp. pneumoniae	miss	Homo sapiens	scaffold	China	11	GCA_002852415.1_ASM285241v1_genomic.fna
Klebsiella pneumoniae subsp. pneumoniae	miss	Homo sapiens	scaffold	China	11	GCA_002852435.1_ASM285243v1_genomic.fna
Klebsiella pneumoniae subsp. pneumoniae	miss	Homo sapiens	scaffold	China	11	GCA_002852455.1_ASM285245v1_genomic.fna
Klebsiella pneumoniae subsp. pneumoniae	miss	Homo sapiens	scaffold	China	11	GCA_002852475.1_ASM285247v1_genomic.fna
Klebsiella pneumoniae subsp. pneumoniae	miss	Homo sapiens	scaffold	China	11	GCA_002852485.1_ASM285248v1_genomic.fna
Klebsiella pneumoniae subsp. pneumoniae	miss	Homo sapiens	scaffold	China	11	GCA_002852515.1_ASM285251v1_genomic.fna
Klebsiella pneumoniae subsp. pneumoniae	miss	Homo sapiens	scaffold	China	11	GCA_002852535.1_ASM285253v1_genomic.fna
Klebsiella pneumoniae subsp. pneumoniae	miss	Homo sapiens	scaffold	China	11	GCA_002852545.1_ASM285254v1_genomic.fna
Klebsiella pneumoniae subsp. pneumoniae	miss	Homo sapiens	scaffold	China	45	GCA_002852575.1_ASM285257v1_genomic.fna
Klebsiella pneumoniae subsp. pneumoniae	miss	Homo sapiens	scaffold	China	11	GCA_002852585.1_ASM285258v1_genomic.fna
Klebsiella pneumoniae subsp. ozaenae	miss	Homo sapiens	scaffold	China	412	GCA_002852615.1_ASM285261v1_genomic.fna
Klebsiella pneumoniae subsp. pneumoniae	miss	Homo sapiens	scaffold	China	11	GCA_002852635.1_ASM285263v1_genomic.fna
Klebsiella pneumoniae subsp. pneumoniae	miss	Homo sapiens	scaffold	China	11	GCA_002852645.1_ASM285264v1_genomic.fna
Klebsiella pneumoniae subsp. pneumoniae	miss	Homo sapiens	scaffold	China	11	GCA_002852675.1_ASM285267v1_genomic.fna
Klebsiella pneumoniae subsp. pneumoniae	miss	Homo sapiens	scaffold	China	11	GCA_002852695.1_ASM285269v1_genomic.fna
Klebsiella pneumoniae subsp. pneumoniae	miss	Homo sapiens	scaffold	China	11	GCA_002852715.1_ASM285271v1_genomic.fna
Klebsiella pneumoniae subsp. pneumoniae	miss	Homo sapiens	scaffold	China	45	GCA_002852735.1_ASM285273v1_genomic.fna
Klebsiella pneumoniae subsp. pneumoniae	miss	Homo sapiens	scaffold	China	11	GCA_002852755.1_ASM285275v1_genomic.fna
Klebsiella pneumoniae subsp. pneumoniae	miss	Homo sapiens	scaffold	China	11	GCA_002852775.1_ASM285277v1_genomic.fna
Klebsiella pneumoniae subsp. pneumoniae	miss	Homo sapiens	scaffold	China	11	GCA_002852785.1_ASM285278v1_genomic.fna
Klebsiella pneumoniae subsp. pneumoniae	miss	Homo sapiens	scaffold	China	11	GCA_002852815.1_ASM285281v1_genomic.fna
Klebsiella pneumoniae subsp. pneumoniae	miss	Homo sapiens	scaffold	China	11	GCA_002852825.1_ASM285282v1_genomic.fna
Klebsiella pneumoniae subsp. pneumoniae	miss	Homo sapiens	scaffold	China	11	GCA_002852855.1_ASM285285v1_genomic.fna
Klebsiella pneumoniae subsp. pneumoniae	miss	Homo sapiens	scaffold	China	-	GCA_002852895.1_ASM285289v1_genomic.fna
Klebsiella pneumoniae subsp. ozaenae	miss	Homo sapiens	scaffold	China	1229	GCA_002853095.1_ASM285309v1_genomic.fna
Klebsiella pneumoniae subsp. ozaenae	miss	Homo sapiens	scaffold	China	23	GCA_002853115.1_ASM285311v1_genomic.fna
Klebsiella pneumoniae subsp. pneumoniae	miss	Homo sapiens	scaffold	China	1037	GCA_002853135.1_ASM285313v1_genomic.fna
Klebsiella pneumoniae subsp. pneumoniae	miss	Homo sapiens	scaffold	China	37	GCA_002853155.1_ASM285315v1_genomic.fna
Klebsiella pneumoniae subsp. ozaenae	miss	Homo sapiens	scaffold	China	660	GCA_002853165.1_ASM285316v1_genomic.fna
Klebsiella pneumoniae subsp. pneumoniae	miss	Homo sapiens	scaffold	China	11	GCA_002853235.1_ASM285323v1_genomic.fna
Klebsiella pneumoniae subsp. pneumoniae	miss	Homo sapiens	scaffold	China	11	GCA_002853255.1_ASM285325v1_genomic.fna
Klebsiella pneumoniae subsp. pneumoniae	miss	Homo sapiens	scaffold	China	11	GCA_002853285.1_ASM285328v1_genomic.fna
Klebsiella pneumoniae subsp. pneumoniae	miss	Homo sapiens	scaffold	China	11	GCA_002853315.1_ASM285331v1_genomic.fna
Klebsiella pneumoniae subsp. pneumoniae	miss	Homo sapiens	scaffold	China	11	GCA_002853335.1_ASM285333v1_genomic.fna
Klebsiella pneumoniae subsp. ozaenae	miss	Homo sapiens	scaffold	China	37	GCA_002853355.1_ASM285335v1_genomic.fna
Klebsiella pneumoniae subsp. pneumoniae	miss	Homo sapiens	scaffold	China	11	GCA_002853375.1_ASM285337v1_genomic.fna
Klebsiella pneumoniae subsp. ozaenae	miss	Homo sapiens	scaffold	China	35	GCA_002853385.1_ASM285338v1_genomic.fna
Klebsiella pneumoniae subsp. pneumoniae	miss	Homo sapiens	scaffold	China	2407	GCA_002853395.1_ASM285339v1_genomic.fna
Klebsiella pneumoniae	miss	Homo sapiens	scaffold	China	1	GCA_002853455.1_ASM285345v1_genomic.fna
Klebsiella pneumoniae	miss	Homo sapiens	scaffold	China	1	GCA_002853465.1_ASM285346v1_genomic.fna
Klebsiella pneumoniae subsp. pneumoniae	miss	Homo sapiens	scaffold	China	37	GCA_002853515.1_ASM285351v1_genomic.fna
Klebsiella pneumoniae subsp. ozaenae	miss	Homo sapiens	scaffold	China	37	GCA_002853525.1_ASM285352v1_genomic.fna
Klebsiella pneumoniae subsp. pneumoniae	miss	Homo sapiens	scaffold	China	37	GCA_002853535.1_ASM285353v1_genomic.fna
Klebsiella pneumoniae	miss	Homo sapiens	scaffold	China	11	GCA_002861655.1_ASM286165v1_genomic.fna
Klebsiella pneumoniae	miss	Homo sapiens	scaffold	China	11	GCA_002861705.1_ASM286170v1_genomic.fna
Klebsiella pneumoniae	miss	Homo sapiens	scaffold	China	11	GCA_002861725.1_ASM286172v1_genomic.fna
Klebsiella pneumoniae	miss	Homo sapiens	scaffold	China	11	GCA_002861745.1_ASM286174v1_genomic.fna
Klebsiella pneumoniae	miss	Homo sapiens	scaffold	USA	2760	GCA_002861845.1_ASM286184v1_genomic.fna
Klebsiella pneumoniae	[]	Homo sapiens	scaffold	China	375	GCA_002887745.1_ASM288774v1_genomic.fna
Klebsiella pneumoniae	clinical samples	Homo sapiens	scaffold	Netherlands	20	GCA_002895645.1_ASM289564v1_genomic.fna
Klebsiella pneumoniae	rectal	Homo sapiens	scaffold	Netherlands	258	GCA_002900015.1_ASM290001v1_genomic.fna
Klebsiella pneumoniae	rectal	Homo sapiens	scaffold	Netherlands	258	GCA_002900035.1_ASM290003v1_genomic.fna
Klebsiella pneumoniae	Rectal	Homo sapiens	scaffold	Netherlands	258	GCA_002900145.1_ASM290014v1_genomic.fna
Klebsiella pneumoniae	blood	Homo sapiens	scaffold	India	-	GCA_002909695.1_ASM290969v1_genomic.fna
Klebsiella pneumoniae	blood	Homo sapiens	scaffold	India	307	GCA_002909795.1_ASM290979v1_genomic.fna
Klebsiella pneumoniae	blood	Homo sapiens	scaffold	India	395	GCA_002909805.1_ASM290980v1_genomic.fna
Klebsiella pneumoniae	urine	Homo sapiens	scaffold	Spain	15	GCA_002925715.1_ASM292571v1_genomic.fna
Klebsiella pneumoniae	urine	Homo sapiens	scaffold	Spain	15	GCA_002925745.1_ASM292574v1_genomic.fna
Klebsiella pneumoniae	Hand	Homo sapiens	scaffold	Cameroon	307	GCA_002934815.1_ASM293481v1_genomic.fna
Klebsiella pneumoniae	blood	Homo sapiens	scaffold	India	11	GCA_002967795.1_ASM296779v1_genomic.fna
Klebsiella pneumoniae	blood	Homo sapiens	scaffold	India	147	GCA_002967805.1_ASM296780v1_genomic.fna
Klebsiella pneumoniae	blood	Homo sapiens	scaffold	India	14	GCA_002967835.1_ASM296783v1_genomic.fna
Klebsiella pneumoniae	blood	Homo sapiens	scaffold	India	14	GCA_002969015.1_ASM296901v1_genomic.fna
Klebsiella pneumoniae	blood	Homo sapiens	scaffold	India	147	GCA_002969095.1_ASM296909v1_genomic.fna
Klebsiella pneumoniae	cerebrospinal fluid	Homo sapiens	scaffold	India	-	GCA_003006455.1_ASM300645v1_genomic.fna
Klebsiella pneumoniae	blood	Homo sapiens	scaffold	India	-	GCA_003006465.1_ASM300646v1_genomic.fna
Klebsiella pneumoniae	Endotracheal Aspirate	Homo sapiens	scaffold	India	43	GCA_003006495.1_ASM300649v1_genomic.fna
Klebsiella pneumoniae	blood	Homo sapiens	scaffold	India	231	GCA_003006505.1_ASM300650v1_genomic.fna
Klebsiella pneumoniae	blood	Homo sapiens	scaffold	India	-	GCA_003006535.1_ASM300653v1_genomic.fna
Klebsiella pneumoniae	blood	Homo sapiens	scaffold	India	231	GCA_003028355.1_ASM302835v1_genomic.fna
Klebsiella pneumoniae	blood	Homo sapiens	scaffold	India	231	GCA_003028375.1_ASM302837v1_genomic.fna
Klebsiella pneumoniae	blood	Homo sapiens	scaffold	India	43	GCA_003028595.1_ASM302859v1_genomic.fna
Klebsiella pneumoniae	urine	Homo sapiens	scaffold	India	231	GCA_003028605.1_ASM302860v1_genomic.fna
Klebsiella pneumoniae	blood	Homo sapiens	scaffold	Greece	101	GCA_003034395.1_ASM303439v1_genomic.fna
Klebsiella pneumoniae	blood	Homo sapiens	scaffold	Greece	101	GCA_003034425.1_ASM303442v1_genomic.fna
Klebsiella pneumoniae	blood	Homo sapiens	scaffold	Greece	101	GCA_003034445.1_ASM303444v1_genomic.fna
Klebsiella pneumoniae	blood	Homo sapiens	scaffold	Greece	101	GCA_003034505.1_ASM303450v1_genomic.fna
Klebsiella pneumoniae	blood	Homo sapiens	scaffold	Greece	101	GCA_003034525.1_ASM303452v1_genomic.fna
Klebsiella pneumoniae	blood	Homo sapiens	scaffold	Greece	101	GCA_003034545.1_ASM303454v1_genomic.fna
Klebsiella pneumoniae	miss	Homo sapiens	scaffold	China	11	GCA_003036465.1_ASM303646v1_genomic.fna
Klebsiella pneumoniae	miss	Homo sapiens	scaffold	China	11	GCA_003036545.1_ASM303654v1_genomic.fna
Klebsiella pneumoniae	miss	Homo sapiens	scaffold	China	11	GCA_003036605.1_ASM303660v1_genomic.fna
Klebsiella pneumoniae	miss	Homo sapiens	scaffold	China	11	GCA_003036725.1_ASM303672v1_genomic.fna
Klebsiella pneumoniae	miss	Homo sapiens	scaffold	China	11	GCA_003036765.1_ASM303676v1_genomic.fna
Klebsiella pneumoniae	miss	Homo sapiens	scaffold	China	11	GCA_003036805.1_ASM303680v1_genomic.fna
Klebsiella pneumoniae	miss	Homo sapiens	scaffold	China	11	GCA_003036815.1_ASM303681v1_genomic.fna
Klebsiella pneumoniae	miss	Homo sapiens	scaffold	China	11	GCA_003036845.1_ASM303684v1_genomic.fna
Klebsiella pneumoniae	miss	Homo sapiens	scaffold	China	11	GCA_003036865.1_ASM303686v1_genomic.fna
Klebsiella pneumoniae	miss	Homo sapiens	scaffold	China	11	GCA_003036885.1_ASM303688v1_genomic.fna
Klebsiella pneumoniae	miss	Homo sapiens	scaffold	China	11	GCA_003036895.1_ASM303689v1_genomic.fna
Klebsiella pneumoniae	miss	Homo sapiens	scaffold	China	11	GCA_003036925.1_ASM303692v1_genomic.fna
Klebsiella pneumoniae	miss	Homo sapiens	scaffold	China	11	GCA_003036945.1_ASM303694v1_genomic.fna
Klebsiella pneumoniae	miss	Homo sapiens	scaffold	China	11	GCA_003036965.1_ASM303696v1_genomic.fna
Klebsiella pneumoniae	miss	Homo sapiens	scaffold	China	11	GCA_003037045.1_ASM303704v1_genomic.fna
Klebsiella pneumoniae	miss	Homo sapiens	scaffold	China	11	GCA_003037055.1_ASM303705v1_genomic.fna
Klebsiella pneumoniae	miss	Homo sapiens	scaffold	China	11	GCA_003037065.1_ASM303706v1_genomic.fna
Klebsiella pneumoniae	miss	Homo sapiens	scaffold	China	11	GCA_003037105.1_ASM303710v1_genomic.fna
Klebsiella pneumoniae	miss	Homo sapiens	scaffold	China	11	GCA_003037145.1_ASM303714v1_genomic.fna
Klebsiella pneumoniae	miss	Homo sapiens	scaffold	China	11	GCA_003037205.1_ASM303720v1_genomic.fna
Klebsiella pneumoniae	miss	Homo sapiens	scaffold	China	-	GCA_003037245.1_ASM303724v1_genomic.fna
Klebsiella pneumoniae	miss	Homo sapiens	scaffold	China	11	GCA_003037365.1_ASM303736v1_genomic.fna
Klebsiella pneumoniae	miss	Homo sapiens	scaffold	China	11	GCA_003037385.1_ASM303738v1_genomic.fna
Klebsiella pneumoniae	miss	Homo sapiens	scaffold	China	11	GCA_003037395.1_ASM303739v1_genomic.fna
Klebsiella pneumoniae	miss	Homo sapiens	scaffold	China	11	GCA_003037435.1_ASM303743v1_genomic.fna
Klebsiella pneumoniae	miss	Homo sapiens	scaffold	China	11	GCA_003037475.1_ASM303747v1_genomic.fna
Klebsiella pneumoniae	miss	Homo sapiens	scaffold	China	11	GCA_003037515.1_ASM303751v1_genomic.fna
Klebsiella pneumoniae	miss	Homo sapiens	scaffold	China	45	GCA_003037535.1_ASM303753v1_genomic.fna
Klebsiella pneumoniae	miss	Homo sapiens	scaffold	China	11	GCA_003037585.1_ASM303758v1_genomic.fna
Klebsiella pneumoniae	miss	Homo sapiens	scaffold	China	11	GCA_003037805.1_ASM303780v1_genomic.fna
Klebsiella pneumoniae	miss	Homo sapiens	scaffold	China	11	GCA_003037865.1_ASM303786v1_genomic.fna
Klebsiella pneumoniae	miss	Homo sapiens	scaffold	China	11	GCA_003037915.1_ASM303791v1_genomic.fna
Klebsiella pneumoniae	miss	Homo sapiens	scaffold	China	11	GCA_003037995.1_ASM303799v1_genomic.fna
Klebsiella pneumoniae	miss	Homo sapiens	scaffold	China	11	GCA_003038015.1_ASM303801v1_genomic.fna
Klebsiella pneumoniae	miss	Homo sapiens	scaffold	China	11	GCA_003038035.1_ASM303803v1_genomic.fna
Klebsiella pneumoniae	miss	Homo sapiens	scaffold	China	11	GCA_003038075.1_ASM303807v1_genomic.fna
Klebsiella pneumoniae	miss	Homo sapiens	scaffold	China	11	GCA_003038095.1_ASM303809v1_genomic.fna
Klebsiella pneumoniae	miss	Homo sapiens	scaffold	China	307	GCA_003038115.1_ASM303811v1_genomic.fna
Klebsiella pneumoniae	miss	Homo sapiens	scaffold	China	11	GCA_003038135.1_ASM303813v1_genomic.fna
Klebsiella pneumoniae	miss	Homo sapiens	scaffold	China	11	GCA_003038155.1_ASM303815v1_genomic.fna
Klebsiella pneumoniae	miss	Homo sapiens	scaffold	China	11	GCA_003038175.1_ASM303817v1_genomic.fna
Klebsiella pneumoniae	miss	Homo sapiens	scaffold	China	11	GCA_003038195.1_ASM303819v1_genomic.fna
Klebsiella pneumoniae	miss	Homo sapiens	scaffold	China	11	GCA_003038235.1_ASM303823v1_genomic.fna
Klebsiella pneumoniae	cerebrospinal fluid	Homo sapiens	scaffold	India	3249	GCA_003046765.1_ASM304676v1_genomic.fna
Klebsiella pneumoniae	tracheal aspirate	Homo sapiens	scaffold	India	231	GCA_003046825.1_ASM304682v1_genomic.fna
Klebsiella pneumoniae	hand	Homo sapiens	scaffold	Cameroon	39	GCA_003086235.1_ASM308623v1_genomic.fna
Klebsiella pneumoniae	Stool	Homo sapiens	scaffold	Japan	34	GCA_003112795.1_ASM311279v1_genomic.fna
Klebsiella pneumoniae	Urine	Homo sapiens	scaffold	Japan	34	GCA_003115355.1_ASM311535v1_genomic.fna
Klebsiella pneumoniae	Stool	Homo sapiens	scaffold	Japan	34	GCA_003115375.1_ASM311537v1_genomic.fna
Klebsiella pneumoniae	Stool	Homo sapiens	scaffold	Japan	34	GCA_003115395.1_ASM311539v1_genomic.fna
Klebsiella pneumoniae	Stool	Homo sapiens	scaffold	Japan	7	GCA_003115415.1_ASM311541v1_genomic.fna
Klebsiella pneumoniae	Stool	Homo sapiens	scaffold	Japan	7	GCA_003115435.1_ASM311543v1_genomic.fna
Klebsiella pneumoniae	Stool	Homo sapiens	scaffold	Japan	34	GCA_003115455.1_ASM311545v1_genomic.fna
Klebsiella pneumoniae	Stool	Homo sapiens	scaffold	Japan	34	GCA_003115475.2_ASM311547v2_genomic.fna
Klebsiella pneumoniae	Stool	Homo sapiens	scaffold	Japan	34	GCA_003115495.1_ASM311549v1_genomic.fna
Klebsiella pneumoniae	Stool	Homo sapiens	scaffold	Japan	34	GCA_003115515.1_ASM311551v1_genomic.fna
Klebsiella pneumoniae	Stool	Homo sapiens	scaffold	Japan	34	GCA_003115535.1_ASM311553v1_genomic.fna
Klebsiella pneumoniae	Stool	Homo sapiens	scaffold	Japan	34	GCA_003115615.1_ASM311561v1_genomic.fna
Klebsiella pneumoniae	Stool	Homo sapiens	scaffold	Japan	34	GCA_003115635.1_ASM311563v1_genomic.fna
Klebsiella pneumoniae	Stool	Homo sapiens	scaffold	Japan	34	GCA_003115655.1_ASM311565v1_genomic.fna
Klebsiella pneumoniae	Stool	Homo sapiens	scaffold	Japan	34	GCA_003115675.1_ASM311567v1_genomic.fna
Klebsiella pneumoniae	Stool	Homo sapiens	scaffold	Japan	34	GCA_003115695.1_ASM311569v1_genomic.fna
Klebsiella pneumoniae	Stool	Homo sapiens	scaffold	Japan	34	GCA_003115715.1_ASM311571v1_genomic.fna
Klebsiella pneumoniae	Stool	Homo sapiens	scaffold	Japan	34	GCA_003115735.1_ASM311573v1_genomic.fna
Klebsiella pneumoniae	Stool	Homo sapiens	scaffold	Japan	34	GCA_003115755.1_ASM311575v1_genomic.fna
Klebsiella pneumoniae	Stool	Homo sapiens	scaffold	Japan	-	GCA_003116205.1_ASM311620v1_genomic.fna
Klebsiella pneumoniae	Stool	Homo sapiens	scaffold	Japan	-	GCA_003116225.1_ASM311622v1_genomic.fna
Klebsiella pneumoniae	Stool	Homo sapiens	scaffold	Japan	34	GCA_003116245.1_ASM311624v1_genomic.fna
Klebsiella pneumoniae	Stool	Homo sapiens	scaffold	Japan	34	GCA_003116265.1_ASM311626v1_genomic.fna
Klebsiella pneumoniae	Stool	Homo sapiens	scaffold	Japan	34	GCA_003116285.1_ASM311628v1_genomic.fna
Klebsiella pneumoniae	Stool	Homo sapiens	scaffold	Japan	34	GCA_003116305.1_ASM311630v1_genomic.fna
Klebsiella pneumoniae	Stool	Homo sapiens	scaffold	Japan	34	GCA_003116325.1_ASM311632v1_genomic.fna
Klebsiella pneumoniae	Stool	Homo sapiens	scaffold	Japan	-	GCA_003116345.1_ASM311634v1_genomic.fna
Klebsiella pneumoniae	Stool	Homo sapiens	scaffold	Japan	34	GCA_003116365.1_ASM311636v1_genomic.fna
Klebsiella pneumoniae	Stool	Homo sapiens	scaffold	Japan	34	GCA_003116385.1_ASM311638v1_genomic.fna
Klebsiella pneumoniae	Stool	Homo sapiens	scaffold	Japan	34	GCA_003116405.1_ASM311640v1_genomic.fna
Klebsiella pneumoniae	pus	Homo sapiens	scaffold	China	15	GCA_003143715.1_ASM314371v1_genomic.fna
Klebsiella pneumoniae	ascitic fluid	Homo sapiens	scaffold	China	15	GCA_003143735.1_ASM314373v1_genomic.fna
Klebsiella pneumoniae	wound infection	Homo sapiens	scaffold	Turkey	16	GCA_003144055.1_ASM314405v1_genomic.fna
Klebsiella pneumoniae	urine	Homo sapiens	scaffold	Turkey	377	GCA_003183925.1_ASM318392v1_genomic.fna
Klebsiella pneumoniae	blood	Homo sapiens	scaffold	Turkey	22	GCA_003183935.1_ASM318393v1_genomic.fna
Klebsiella pneumoniae	blood	Homo sapiens	scaffold	Turkey	15	GCA_003183975.1_ASM318397v1_genomic.fna
Klebsiella pneumoniae	endotracheal aspirate	Homo sapiens	scaffold	Turkey	101	GCA_003184005.1_ASM318400v1_genomic.fna
Klebsiella pneumoniae	miss	Homo sapiens	scaffold	Spain	258	GCA_003186645.1_ASM318664v1_genomic.fna
Klebsiella pneumoniae	miss	Homo sapiens	scaffold	Niger	11	GCA_003186705.1_ASM318670v1_genomic.fna
Klebsiella pneumoniae	miss	Homo sapiens	scaffold	Spain	39	GCA_003186725.1_ASM318672v1_genomic.fna
Klebsiella pneumoniae subsp. pneumoniae	Rectal swab	Homo sapiens	scaffold	Italy	2502	GCA_003226905.1_ASM322690v1_genomic.fna
Klebsiella pneumoniae subsp. pneumoniae	Rectal swab	Homo sapiens	scaffold	Italy	512	GCA_003226935.1_ASM322693v1_genomic.fna
Klebsiella pneumoniae subsp. pneumoniae	Rectal swab	Homo sapiens	scaffold	Italy	35	GCA_003226945.1_ASM322694v1_genomic.fna
Klebsiella pneumoniae subsp. pneumoniae	Rectal swab	Homo sapiens	scaffold	Italy	101	GCA_003226975.1_ASM322697v1_genomic.fna
Klebsiella pneumoniae subsp. pneumoniae	Rectal swab	Homo sapiens	scaffold	Italy	512	GCA_003226995.1_ASM322699v1_genomic.fna
Klebsiella pneumoniae subsp. pneumoniae	Rectal swab	Homo sapiens	scaffold	Italy	512	GCA_003227015.1_ASM322701v1_genomic.fna
Klebsiella pneumoniae subsp. pneumoniae	Rectal swab	Homo sapiens	scaffold	Italy	307	GCA_003227035.1_ASM322703v1_genomic.fna
Klebsiella pneumoniae subsp. pneumoniae	Rectal swab	Homo sapiens	scaffold	Italy	147	GCA_003227055.1_ASM322705v1_genomic.fna
Klebsiella pneumoniae subsp. pneumoniae	Rectal swab	Homo sapiens	scaffold	Italy	512	GCA_003227065.1_ASM322706v1_genomic.fna
Klebsiella pneumoniae subsp. pneumoniae	Rectal swab	Homo sapiens	scaffold	Italy	2502	GCA_003227105.1_ASM322710v1_genomic.fna
Klebsiella pneumoniae subsp. pneumoniae	Rectal swab	Homo sapiens	scaffold	Italy	2502	GCA_003227135.1_ASM322713v1_genomic.fna
Klebsiella pneumoniae subsp. pneumoniae	Rectal swab	Homo sapiens	scaffold	Italy	2502	GCA_003227155.1_ASM322715v1_genomic.fna
Klebsiella pneumoniae subsp. pneumoniae	Rectal swab	Homo sapiens	scaffold	Italy	2502	GCA_003227175.1_ASM322717v1_genomic.fna
Klebsiella pneumoniae subsp. pneumoniae	Rectal swab	Homo sapiens	scaffold	Italy	2502	GCA_003227185.1_ASM322718v1_genomic.fna
Klebsiella pneumoniae subsp. pneumoniae	Rectal swab	Homo sapiens	scaffold	Italy	512	GCA_003227235.1_ASM322723v1_genomic.fna
Klebsiella pneumoniae subsp. pneumoniae	Rectal swab	Homo sapiens	scaffold	Italy	512	GCA_003227245.1_ASM322724v1_genomic.fna
Klebsiella pneumoniae subsp. pneumoniae	Rectal swab	Homo sapiens	scaffold	Italy	2502	GCA_003227275.1_ASM322727v1_genomic.fna
Klebsiella pneumoniae subsp. pneumoniae	Rectal swab	Homo sapiens	scaffold	Italy	2502	GCA_003227305.1_ASM322730v1_genomic.fna
Klebsiella pneumoniae subsp. pneumoniae	Rectal swab	Homo sapiens	scaffold	Italy	2502	GCA_003227425.1_ASM322742v1_genomic.fna
Klebsiella pneumoniae subsp. pneumoniae	Rectal swab	Homo sapiens	scaffold	Italy	2502	GCA_003227455.1_ASM322745v1_genomic.fna
Klebsiella pneumoniae subsp. pneumoniae	Rectal swab	Homo sapiens	scaffold	Italy	2502	GCA_003227475.1_ASM322747v1_genomic.fna
Klebsiella pneumoniae subsp. pneumoniae	Rectal swab	Homo sapiens	scaffold	Italy	2502	GCA_003227495.1_ASM322749v1_genomic.fna
Klebsiella pneumoniae subsp. pneumoniae	Rectal swab	Homo sapiens	scaffold	Italy	101	GCA_003227515.1_ASM322751v1_genomic.fna
Klebsiella pneumoniae subsp. pneumoniae	Rectal swab	Homo sapiens	scaffold	Italy	29	GCA_003227595.1_ASM322759v1_genomic.fna
Klebsiella pneumoniae subsp. pneumoniae	Rectal swab	Homo sapiens	scaffold	Italy	2502	GCA_003227635.1_ASM322763v1_genomic.fna
Klebsiella pneumoniae subsp. pneumoniae	Rectal swab	Homo sapiens	scaffold	Italy	101	GCA_003227655.1_ASM322765v1_genomic.fna
Klebsiella pneumoniae subsp. pneumoniae	Rectal swab	Homo sapiens	scaffold	Italy	2502	GCA_003227695.1_ASM322769v1_genomic.fna
Klebsiella pneumoniae	stool	Homo sapiens	scaffold	China	11	GCA_003312125.1_ASM331212v1_genomic.fna
Klebsiella pneumoniae	stool	Homo sapiens	scaffold	China	11	GCA_003312135.1_ASM331213v1_genomic.fna
Klebsiella pneumoniae	stool	Homo sapiens	scaffold	China	290	GCA_003312145.1_ASM331214v1_genomic.fna
Klebsiella pneumoniae	stool	Homo sapiens	scaffold	China	11	GCA_003312185.1_ASM331218v1_genomic.fna
Klebsiella pneumoniae	stool	Homo sapiens	scaffold	China	1	GCA_003312195.1_ASM331219v1_genomic.fna
Klebsiella pneumoniae	stool	Homo sapiens	scaffold	China	11	GCA_003312205.1_ASM331220v1_genomic.fna
Klebsiella pneumoniae	fecal sample	Homo sapiens	scaffold	China	11	GCA_003323855.1_ASM332385v1_genomic.fna
Klebsiella pneumoniae	fecal sample	Homo sapiens	scaffold	China	11	GCA_003323865.1_ASM332386v1_genomic.fna
Klebsiella pneumoniae	fecal sample	Homo sapiens	scaffold	China	11	GCA_003323895.1_ASM332389v1_genomic.fna
Klebsiella pneumoniae	fecal sample	Homo sapiens	scaffold	China	11	GCA_003323905.1_ASM332390v1_genomic.fna
Klebsiella pneumoniae	fecal sample	Homo sapiens	scaffold	China	11	GCA_003323935.1_ASM332393v1_genomic.fna
Klebsiella pneumoniae	fecal sample	Homo sapiens	scaffold	China	11	GCA_003323955.1_ASM332395v1_genomic.fna
Klebsiella pneumoniae	fecal sample	Homo sapiens	scaffold	China	11	GCA_003323965.1_ASM332396v1_genomic.fna
Klebsiella pneumoniae	fecal sample	Homo sapiens	scaffold	China	11	GCA_003323985.1_ASM332398v1_genomic.fna
Klebsiella pneumoniae subsp. pneumoniae	patient blood	Homo sapiens	scaffold	China	11	GCA_003332095.1_ASM333209v1_genomic.fna
Klebsiella pneumoniae	miss	Homo sapiens	scaffold	Switzerland	258	GCA_003353255.1_ASM335325v1_genomic.fna
Klebsiella pneumoniae	feces	Homo sapiens	scaffold	Switzerland	512	GCA_003353295.1_ASM335329v1_genomic.fna
Klebsiella pneumoniae	urine	Homo sapiens	scaffold	Switzerland	512	GCA_003353335.1_ASM335333v1_genomic.fna
Klebsiella pneumoniae	Blood culture	Homo sapiens	scaffold	Switzerland	512	GCA_003353395.1_ASM335339v1_genomic.fna
Klebsiella pneumoniae	Sputum	Homo sapiens	scaffold	Japan	258	GCA_003402495.1_ASM340249v1_genomic.fna
Klebsiella pneumoniae	blood	Homo sapiens	scaffold	China	11	GCA_003402995.1_ASM340299v1_genomic.fna
Klebsiella pneumoniae	urine	Homo sapiens	scaffold	Brazil	11	GCA_003432105.1_ASM343210v1_genomic.fna
Klebsiella pneumoniae	Rectum	Homo sapiens	scaffold	South Africa	152	GCA_003432535.1_ASM343253v1_genomic.fna
Klebsiella pneumoniae	Rectum	Homo sapiens	scaffold	South Africa	152	GCA_003432545.1_ASM343254v1_genomic.fna
Klebsiella pneumoniae	Rectum	Homo sapiens	scaffold	South Africa	152	GCA_003432555.1_ASM343255v1_genomic.fna
Klebsiella pneumoniae	Rectum	Homo sapiens	scaffold	South Africa	152	GCA_003432565.1_ASM343256v1_genomic.fna
Klebsiella pneumoniae	Rectum	Homo sapiens	scaffold	South Africa	152	GCA_003432615.1_ASM343261v1_genomic.fna
Klebsiella pneumoniae	Rectum	Homo sapiens	scaffold	South Africa	152	GCA_003432625.1_ASM343262v1_genomic.fna
Klebsiella pneumoniae	Rectum	Homo sapiens	scaffold	South Africa	152	GCA_003432635.1_ASM343263v1_genomic.fna
Klebsiella pneumoniae	Rectum	Homo sapiens	scaffold	South Africa	152	GCA_003432645.1_ASM343264v1_genomic.fna
Klebsiella pneumoniae	Rectum	Homo sapiens	scaffold	South Africa	152	GCA_003432685.1_ASM343268v1_genomic.fna
Klebsiella pneumoniae	Rectum	Homo sapiens	scaffold	South Africa	3136	GCA_003432695.1_ASM343269v1_genomic.fna
Klebsiella pneumoniae	feces	Homo sapiens	scaffold	China	23	GCA_003437255.1_ASM343725v1_genomic.fna
Klebsiella pneumoniae	feces	Homo sapiens	scaffold	China	875	GCA_003437295.1_ASM343729v1_genomic.fna
Klebsiella pneumoniae	feces	Homo sapiens	scaffold	China	1203	GCA_003439475.1_ASM343947v1_genomic.fna
Klebsiella pneumoniae	feces	Homo sapiens	scaffold	China	268	GCA_003466135.1_ASM346613v1_genomic.fna
Klebsiella pneumoniae	feces	Homo sapiens	scaffold	China	2054	GCA_003469885.1_ASM346988v1_genomic.fna
Klebsiella pneumoniae	feces	Homo sapiens	scaffold	China	17	GCA_003471715.1_ASM347171v1_genomic.fna
Klebsiella pneumoniae	feces	Homo sapiens	scaffold	China	29	GCA_003475175.1_ASM347517v1_genomic.fna
Klebsiella pneumoniae	miss	Homo sapiens	scaffold	China	11	GCA_003569825.1_ASM356982v1_genomic.fna
Klebsiella pneumoniae	miss	Homo sapiens	scaffold	China	2237	GCA_003569845.1_ASM356984v1_genomic.fna
Klebsiella pneumoniae	miss	Homo sapiens	scaffold	China	2237	GCA_003569855.1_ASM356985v1_genomic.fna
Klebsiella pneumoniae	urine	Homo sapiens	scaffold	Brazil	340	GCA_003576025.1_ASM357602v1_genomic.fna
Klebsiella pneumoniae	blood	Homo sapiens	scaffold	China	437	GCA_003586155.1_ASM358615v1_genomic.fna
Klebsiella pneumoniae	rectal swab	Homo sapiens	scaffold	Germany	101	GCA_003592035.1_ASM359203v1_genomic.fna
Klebsiella pneumoniae	blood	Homo sapiens	scaffold	China	11	GCA_003666705.1_ASM366670v1_genomic.fna
Klebsiella pneumoniae	blood	Homo sapiens	scaffold	China	11	GCA_003666735.1_ASM366673v1_genomic.fna
Klebsiella pneumoniae	blood	Homo sapiens	scaffold	China	11	GCA_003666765.1_ASM366676v1_genomic.fna
Klebsiella pneumoniae	blood	Homo sapiens	scaffold	China	11	GCA_003666785.1_ASM366678v1_genomic.fna
Klebsiella pneumoniae	blood	Homo sapiens	scaffold	China	11	GCA_003666825.1_ASM366682v1_genomic.fna
Klebsiella pneumoniae	blood	Homo sapiens	scaffold	China	11	GCA_003666835.1_ASM366683v1_genomic.fna
Klebsiella pneumoniae	blood	Homo sapiens	scaffold	China	11	GCA_003666845.1_ASM366684v1_genomic.fna
Klebsiella pneumoniae	urine	Homo sapiens	scaffold	China	-	GCA_003711965.1_ASM371196v1_genomic.fna
Klebsiella pneumoniae	abdominal collection	Homo sapiens	scaffold	Brazil	437	GCA_003789125.1_ASM378912v1_genomic.fna
Klebsiella pneumoniae	miss	Homo sapiens	scaffold	Japan	37	GCA_003851825.1_ASM385182v1_genomic.fna
Klebsiella pneumoniae	Gut	Homo sapiens	scaffold	China	307	GCA_003859025.1_ASM385902v1_genomic.fna
Klebsiella pneumoniae	miss	Homo sapiens	scaffold	Japan	1245	GCA_003865115.1_ASM386511v1_genomic.fna
Klebsiella pneumoniae	vitreous fluid from young man	Homo sapiens	scaffold	China	2922	GCA_003977815.1_ASM397781v1_genomic.fna
Klebsiella pneumoniae	sputum	Homo sapiens	scaffold	China	-	GCA_003992345.1_ASM399234v1_genomic.fna
Klebsiella pneumoniae	miss	Homo sapiens	scaffold	China	345	GCA_003992355.1_ASM399235v1_genomic.fna
Klebsiella pneumoniae	miss	Homo sapiens	scaffold	France	76	GCA_004005105.1_ASM400510v1_genomic.fna
Klebsiella pneumoniae	Endotracheal aspirate	Homo sapiens	scaffold	India	231	GCA_004145595.1_ASM414559v1_genomic.fna
Klebsiella pneumoniae	sputum	Homo sapiens	scaffold	India	231	GCA_004145645.1_ASM414564v1_genomic.fna
Klebsiella pneumoniae	patient	Homo sapiens	scaffold	France	147	GCA_004145685.1_ASM414568v1_genomic.fna
Klebsiella pneumoniae	patient	Homo sapiens	scaffold	France	-	GCA_004145745.1_ASM414574v1_genomic.fna
Klebsiella pneumoniae	sputum	Homo sapiens	scaffold	India	231	GCA_004145765.1_ASM414576v1_genomic.fna
Klebsiella pneumoniae	patient	Homo sapiens	scaffold	France	307	GCA_004145875.1_ASM414587v1_genomic.fna
Klebsiella pneumoniae	bronchoalveolar lavage	Homo sapiens	scaffold	India	231	GCA_004145895.1_ASM414589v1_genomic.fna
Klebsiella pneumoniae	endotracheal aspirate	Homo sapiens	scaffold	India	231	GCA_004145945.1_ASM414594v1_genomic.fna
Klebsiella pneumoniae	urine	Homo sapiens	scaffold	India	231	GCA_004145965.1_ASM414596v1_genomic.fna
Klebsiella pneumoniae	patient	Homo sapiens	scaffold	France	37	GCA_004146105.1_ASM414610v1_genomic.fna
Klebsiella pneumoniae	patient	Homo sapiens	scaffold	France	323	GCA_004146115.1_ASM414611v1_genomic.fna
Klebsiella pneumoniae	patient	Homo sapiens	scaffold	France	11	GCA_004146185.1_ASM414618v1_genomic.fna
Klebsiella pneumoniae	sputum	Homo sapiens	scaffold	India	231	GCA_004146315.1_ASM414631v1_genomic.fna
Klebsiella pneumoniae	patient	Homo sapiens	scaffold	France	253	GCA_004146395.1_ASM414639v1_genomic.fna
Klebsiella pneumoniae	Endotracheal aspirate	Homo sapiens	scaffold	India	231	GCA_004151395.1_ASM415139v1_genomic.fna
Klebsiella pneumoniae	patient	Homo sapiens	scaffold	France	307	GCA_004179405.1_ASM417940v1_genomic.fna
Klebsiella pneumoniae	patient	Homo sapiens	scaffold	France	22	GCA_004179485.1_ASM417948v1_genomic.fna
Klebsiella pneumoniae	patient	Homo sapiens	scaffold	France	45	GCA_004179525.1_ASM417952v1_genomic.fna
Klebsiella pneumoniae	patient	Homo sapiens	scaffold	France	-	GCA_004179555.1_ASM417955v1_genomic.fna
Klebsiella pneumoniae	miss	Homo sapiens	scaffold	Egypt	15	GCA_004208855.1_ASM420885v1_genomic.fna
Klebsiella pneumoniae	miss	Homo sapiens	scaffold	United Kingdom	392	GCA_004208865.1_ASM420886v1_genomic.fna
Klebsiella pneumoniae	miss	Homo sapiens	scaffold	Egypt	502	GCA_004209275.1_ASM420927v1_genomic.fna
Klebsiella pneumoniae	Rectum	Homo sapiens	scaffold	South Africa	607	GCA_004212515.1_ASM421251v1_genomic.fna
Klebsiella pneumoniae	Rectum	Homo sapiens	scaffold	South Africa	17	GCA_004212525.1_ASM421252v1_genomic.fna
Klebsiella pneumoniae	Rectum	Homo sapiens	scaffold	South Africa	152	GCA_004212535.1_ASM421253v1_genomic.fna
Klebsiella pneumoniae	Rectum	Homo sapiens	scaffold	South Africa	152	GCA_004212555.1_ASM421255v1_genomic.fna
Klebsiella pneumoniae	Rectum	Homo sapiens	scaffold	South Africa	152	GCA_004212565.1_ASM421256v1_genomic.fna
Klebsiella pneumoniae	sputum	Homo sapiens	scaffold	India	231	GCA_004291275.1_ASM429127v1_genomic.fna
Klebsiella pneumoniae	bronchoalveolar lavage	Homo sapiens	scaffold	India	231	GCA_004291295.1_ASM429129v1_genomic.fna
Klebsiella pneumoniae	Rectum	Homo sapiens	scaffold	South Africa	152	GCA_004296615.1_ASM429661v1_genomic.fna
Klebsiella pneumoniae	Rectum	Homo sapiens	scaffold	South Africa	432	GCA_004296625.1_ASM429662v1_genomic.fna
Klebsiella pneumoniae	miss	Homo sapiens	scaffold	Japan	86	GCA_004313585.1_ASM431358v1_genomic.fna
Klebsiella pneumoniae	miss	Homo sapiens	scaffold	China	11	GCA_004343685.1_ASM434368v1_genomic.fna
Klebsiella pneumoniae	miss	Homo sapiens	scaffold	China	11	GCA_004344895.1_ASM434489v1_genomic.fna
Klebsiella pneumoniae	miss	Homo sapiens	scaffold	China	11	GCA_004344945.1_ASM434494v1_genomic.fna
Klebsiella pneumoniae	patient	Homo sapiens	scaffold	France	323	GCA_004347505.1_ASM434750v1_genomic.fna
Klebsiella pneumoniae	patient	Homo sapiens	scaffold	France	323	GCA_004347675.1_ASM434767v1_genomic.fna
Klebsiella pneumoniae	miss	Homo sapiens	scaffold	China	375	GCA_004353165.1_ASM435316v1_genomic.fna
Klebsiella pneumoniae	blood	Homo sapiens	scaffold	China	11	GCA_004357775.1_ASM435777v1_genomic.fna
Klebsiella pneumoniae	blood	Homo sapiens	scaffold	China	307	GCA_004357805.1_ASM435780v1_genomic.fna
Klebsiella pneumoniae	blood	Homo sapiens	scaffold	China	307	GCA_004357815.1_ASM435781v1_genomic.fna
Klebsiella pneumoniae	blood	Homo sapiens	scaffold	China	307	GCA_004358085.1_ASM435808v1_genomic.fna
Klebsiella pneumoniae	miss	Homo sapiens	scaffold	China	16	GCA_005503745.1_ASM550374v1_genomic.fna
Klebsiella pneumoniae	miss	Homo sapiens	scaffold	China	290	GCA_005503795.1_ASM550379v1_genomic.fna
Klebsiella pneumoniae	miss	Homo sapiens	scaffold	China	290	GCA_005503805.1_ASM550380v1_genomic.fna
Klebsiella pneumoniae	miss	Homo sapiens	scaffold	China	290	GCA_005503815.1_ASM550381v1_genomic.fna
Klebsiella pneumoniae	miss	Homo sapiens	scaffold	China	290	GCA_005503855.1_ASM550385v1_genomic.fna
Klebsiella pneumoniae	miss	Homo sapiens	scaffold	China	309	GCA_005503905.1_ASM550390v1_genomic.fna
Klebsiella pneumoniae	miss	Homo sapiens	scaffold	China	147	GCA_005503935.1_ASM550393v1_genomic.fna
Klebsiella pneumoniae	miss	Homo sapiens	scaffold	China	1441	GCA_005503945.1_ASM550394v1_genomic.fna
Klebsiella pneumoniae	miss	Homo sapiens	scaffold	China	11	GCA_005503975.1_ASM550397v1_genomic.fna
Klebsiella pneumoniae	miss	Homo sapiens	scaffold	China	11	GCA_005503985.1_ASM550398v1_genomic.fna
Klebsiella pneumoniae	miss	Homo sapiens	scaffold	China	11	GCA_005504005.1_ASM550400v1_genomic.fna
Klebsiella pneumoniae	miss	Homo sapiens	scaffold	China	11	GCA_005504015.1_ASM550401v1_genomic.fna
Klebsiella pneumoniae	miss	Homo sapiens	scaffold	China	11	GCA_005504055.1_ASM550405v1_genomic.fna
Klebsiella pneumoniae	miss	Homo sapiens	scaffold	China	11	GCA_005504075.1_ASM550407v1_genomic.fna
Klebsiella pneumoniae	miss	Homo sapiens	scaffold	China	11	GCA_005504085.1_ASM550408v1_genomic.fna
Klebsiella pneumoniae	miss	Homo sapiens	scaffold	China	11	GCA_005504095.1_ASM550409v1_genomic.fna
Klebsiella pneumoniae	miss	Homo sapiens	scaffold	China	290	GCA_005504165.1_ASM550416v1_genomic.fna
Klebsiella pneumoniae	miss	Homo sapiens	scaffold	China	11	GCA_005504185.1_ASM550418v1_genomic.fna
Klebsiella pneumoniae	miss	Homo sapiens	scaffold	China	11	GCA_005504235.1_ASM550423v1_genomic.fna
Klebsiella pneumoniae	miss	Homo sapiens	scaffold	China	11	GCA_005504255.1_ASM550425v1_genomic.fna
Klebsiella pneumoniae	miss	Homo sapiens	scaffold	China	-	GCA_005504265.1_ASM550426v1_genomic.fna
Klebsiella pneumoniae	miss	Homo sapiens	scaffold	China	11	GCA_005504295.1_ASM550429v1_genomic.fna
Klebsiella pneumoniae	miss	Homo sapiens	scaffold	China	11	GCA_005504305.1_ASM550430v1_genomic.fna
Klebsiella pneumoniae	miss	Homo sapiens	scaffold	China	290	GCA_005504315.1_ASM550431v1_genomic.fna
Klebsiella pneumoniae	miss	Homo sapiens	scaffold	China	11	GCA_005504355.1_ASM550435v1_genomic.fna
Klebsiella pneumoniae	miss	Homo sapiens	scaffold	China	11	GCA_005504365.1_ASM550436v1_genomic.fna
Klebsiella pneumoniae	miss	Homo sapiens	scaffold	China	-	GCA_005508835.1_ASM550883v1_genomic.fna
Klebsiella pneumoniae	sputum	Homo sapiens	scaffold	China	942	GCA_006130115.1_ASM613011v1_genomic.fna
Klebsiella pneumoniae	Pus	Homo sapiens	scaffold	China	15	GCA_006130495.1_ASM613049v1_genomic.fna
Klebsiella pneumoniae	miss	Homo sapiens	scaffold	China	15	GCA_006349165.1_ASM634916v1_genomic.fna
Klebsiella pneumoniae	miss	Homo sapiens	scaffold	China	15	GCA_006349175.1_ASM634917v1_genomic.fna
Klebsiella pneumoniae	miss	Homo sapiens	scaffold	China	15	GCA_006349185.1_ASM634918v1_genomic.fna
Klebsiella pneumoniae	miss	Homo sapiens	scaffold	China	15	GCA_006349195.1_ASM634919v1_genomic.fna
Klebsiella pneumoniae	miss	Homo sapiens	scaffold	China	15	GCA_006349205.1_ASM634920v1_genomic.fna
Klebsiella pneumoniae	miss	Homo sapiens	scaffold	China	15	GCA_006349225.1_ASM634922v1_genomic.fna
Klebsiella pneumoniae	miss	Homo sapiens	scaffold	China	15	GCA_006349245.1_ASM634924v1_genomic.fna
Klebsiella pneumoniae	miss	Homo sapiens	scaffold	China	15	GCA_006349275.1_ASM634927v1_genomic.fna
Klebsiella pneumoniae	miss	Homo sapiens	scaffold	China	15	GCA_006349315.1_ASM634931v1_genomic.fna
Klebsiella pneumoniae	blood	Homo sapiens	scaffold	Greece	11	GCA_006351115.1_ASM635111v1_genomic.fna
Klebsiella pneumoniae	urine	Homo sapiens	scaffold	Greece	258	GCA_006487465.1_ASM648746v1_genomic.fna
Klebsiella pneumoniae	urine	Homo sapiens	scaffold	Greece	258	GCA_006487505.1_ASM648750v1_genomic.fna
Klebsiella pneumoniae	urine	Homo sapiens	scaffold	Greece	258	GCA_006487515.1_ASM648751v1_genomic.fna
Klebsiella pneumoniae	urine	Homo sapiens	scaffold	Greece	258	GCA_006487535.1_ASM648753v1_genomic.fna
Klebsiella pneumoniae	wound	Homo sapiens	scaffold	Greece	258	GCA_006487545.1_ASM648754v1_genomic.fna
Klebsiella pneumoniae	urine	Homo sapiens	scaffold	Greece	258	GCA_006487565.1_ASM648756v1_genomic.fna
Klebsiella pneumoniae	wound	Homo sapiens	scaffold	Greece	39	GCA_006487625.1_ASM648762v1_genomic.fna
Klebsiella pneumoniae	miss	Homo sapiens	scaffold	USA	-	GCA_006540375.2_ASM654037v2_genomic.fna
Klebsiella pneumoniae	miss	Homo sapiens	scaffold	France	-	GCA_006540385.2_ASM654038v2_genomic.fna
Klebsiella pneumoniae	miss	Homo sapiens	scaffold	USA	258	GCA_006540455.2_ASM654045v2_genomic.fna
Klebsiella pneumoniae	miss	Homo sapiens	scaffold	USA	13	GCA_006540495.2_ASM654049v2_genomic.fna
Klebsiella pneumoniae	miss	Homo sapiens	scaffold	France	940	GCA_006540515.2_ASM654051v2_genomic.fna
Klebsiella pneumoniae	miss	Homo sapiens	scaffold	USA	14	GCA_006540555.2_ASM654055v2_genomic.fna
Klebsiella pneumoniae	miss	Homo sapiens	scaffold	USA	299	GCA_006540565.2_ASM654056v2_genomic.fna
Klebsiella pneumoniae	miss	Homo sapiens	scaffold	USA	2324	GCA_006540575.2_ASM654057v2_genomic.fna
Klebsiella pneumoniae	miss	Homo sapiens	scaffold	USA	193	GCA_006540595.2_ASM654059v2_genomic.fna
Klebsiella pneumoniae	miss	Homo sapiens	scaffold	USA	193	GCA_006540605.2_ASM654060v2_genomic.fna
Klebsiella pneumoniae	miss	Homo sapiens	scaffold	USA	-	GCA_006540655.2_ASM654065v2_genomic.fna
Klebsiella pneumoniae	miss	Homo sapiens	scaffold	USA	-	GCA_006540665.2_ASM654066v2_genomic.fna
Klebsiella pneumoniae	miss	Homo sapiens	scaffold	USA	-	GCA_006540685.2_ASM654068v2_genomic.fna
Klebsiella pneumoniae	miss	Homo sapiens	scaffold	USA	-	GCA_006540715.2_ASM654071v2_genomic.fna
Klebsiella pneumoniae	miss	Homo sapiens	scaffold	USA	-	GCA_006540805.2_ASM654080v2_genomic.fna
Klebsiella pneumoniae	miss	Homo sapiens	scaffold	USA	-	GCA_006540815.2_ASM654081v2_genomic.fna
Klebsiella pneumoniae	miss	Homo sapiens	scaffold	USA	-	GCA_006540835.2_ASM654083v2_genomic.fna
Klebsiella pneumoniae	miss	Homo sapiens	scaffold	USA	-	GCA_006540925.2_ASM654092v2_genomic.fna
Klebsiella pneumoniae	miss	Homo sapiens	scaffold	USA	-	GCA_006540945.2_ASM654094v2_genomic.fna
Klebsiella pneumoniae	miss	Homo sapiens	scaffold	USA	-	GCA_006540985.2_ASM654098v2_genomic.fna
Klebsiella pneumoniae	miss	Homo sapiens	scaffold	USA	-	GCA_006541015.2_ASM654101v2_genomic.fna
Klebsiella pneumoniae	miss	Homo sapiens	scaffold	USA	-	GCA_006541045.2_ASM654104v2_genomic.fna
Klebsiella pneumoniae	miss	Homo sapiens	scaffold	France	-	GCA_006541945.2_ASM654194v2_genomic.fna
Klebsiella pneumoniae	miss	Homo sapiens	scaffold	USA	-	GCA_006541965.2_ASM654196v2_genomic.fna
Klebsiella pneumoniae	miss	Homo sapiens	scaffold	USA	-	GCA_006541985.2_ASM654198v2_genomic.fna
Klebsiella pneumoniae	miss	Homo sapiens	scaffold	USA	-	GCA_006542015.2_ASM654201v2_genomic.fna
Klebsiella pneumoniae	miss	Homo sapiens	scaffold	USA	-	GCA_006542025.2_ASM654202v2_genomic.fna
Klebsiella pneumoniae	miss	Homo sapiens	scaffold	USA	-	GCA_006542035.2_ASM654203v2_genomic.fna
Klebsiella pneumoniae	miss	Homo sapiens	scaffold	USA	-	GCA_006542045.2_ASM654204v2_genomic.fna
Klebsiella pneumoniae	miss	Homo sapiens	scaffold	USA	-	GCA_006542065.2_ASM654206v2_genomic.fna
Klebsiella pneumoniae	miss	Homo sapiens	scaffold	France	-	GCA_006542115.2_ASM654211v2_genomic.fna
Klebsiella pneumoniae	miss	Homo sapiens	scaffold	USA	-	GCA_006542135.2_ASM654213v2_genomic.fna
Klebsiella pneumoniae	miss	Homo sapiens	scaffold	USA	-	GCA_006542145.2_ASM654214v2_genomic.fna
Klebsiella pneumoniae	miss	Homo sapiens	scaffold	USA	-	GCA_006542165.2_ASM654216v2_genomic.fna
Klebsiella pneumoniae	miss	Homo sapiens	scaffold	USA	-	GCA_006542225.2_ASM654222v2_genomic.fna
Klebsiella pneumoniae	miss	Homo sapiens	scaffold	USA	-	GCA_006542235.2_ASM654223v2_genomic.fna
Klebsiella pneumoniae	clinical sample	Homo sapiens	scaffold	Norway	-	GCA_006937755.1_ASM693775v1_genomic.fna
Klebsiella pneumoniae	clinical sample	Homo sapiens	scaffold	Norway	-	GCA_006937775.1_ASM693777v1_genomic.fna
Klebsiella pneumoniae	clinical sample	Homo sapiens	scaffold	Norway	-	GCA_006937825.1_ASM693782v1_genomic.fna
Klebsiella pneumoniae	clinical sample	Homo sapiens	scaffold	Norway	-	GCA_006937835.1_ASM693783v1_genomic.fna
Klebsiella pneumoniae	clinical sample	Homo sapiens	scaffold	Estonia	-	GCA_006937915.1_ASM693791v1_genomic.fna
Klebsiella pneumoniae	miss	Homo sapiens	scaffold	USA	-	GCA_007421865.1_ASM742186v1_genomic.fna
Klebsiella pneumoniae	sputum	Homo sapiens	scaffold	China	-	GCA_007655035.1_ASM765503v1_genomic.fna
Klebsiella pneumoniae	miss	Homo sapiens	scaffold	China	-	GCA_007896925.1_ASM789692v1_genomic.fna
Klebsiella pneumoniae	miss	Homo sapiens	scaffold	China	-	GCA_007954805.1_ASM795480v1_genomic.fna
Klebsiella pneumoniae	miss	Homo sapiens	scaffold	China	-	GCA_007954835.1_ASM795483v1_genomic.fna
Klebsiella pneumoniae	miss	Homo sapiens	scaffold	China	-	GCA_007954845.1_ASM795484v1_genomic.fna
Klebsiella pneumoniae	miss	Homo sapiens	scaffold	China	-	GCA_007954925.1_ASM795492v1_genomic.fna
Klebsiella pneumoniae	miss	Homo sapiens	scaffold	China	-	GCA_007954935.1_ASM795493v1_genomic.fna
Klebsiella pneumoniae	miss	Homo sapiens	scaffold	China	-	GCA_007954945.1_ASM795494v1_genomic.fna
Klebsiella pneumoniae	miss	Homo sapiens	scaffold	China	-	GCA_007955015.1_ASM795501v1_genomic.fna
Klebsiella pneumoniae	miss	Homo sapiens	scaffold	China	-	GCA_007955065.1_ASM795506v1_genomic.fna
Klebsiella pneumoniae	miss	Homo sapiens	scaffold	China	-	GCA_007955095.1_ASM795509v1_genomic.fna
Klebsiella pneumoniae	feces	Homo sapiens sapiens	scaffold	Russia	-	GCA_007955145.1_ASM795514v1_genomic.fna
Klebsiella pneumoniae	miss	Homo sapiens	scaffold	China	-	GCA_007955155.1_ASM795515v1_genomic.fna
Klebsiella pneumoniae	feces	Homo sapiens sapiens	scaffold	Russia	-	GCA_007955175.1_ASM795517v1_genomic.fna
Klebsiella pneumoniae	feces	Homo sapiens sapiens	scaffold	Russia	-	GCA_007955185.1_ASM795518v1_genomic.fna
Klebsiella pneumoniae	feces	Homo sapiens sapiens	scaffold	Russia	-	GCA_007955215.1_ASM795521v1_genomic.fna
Klebsiella pneumoniae	feces	Homo sapiens sapiens	scaffold	Russia	-	GCA_007955245.1_ASM795524v1_genomic.fna
Klebsiella pneumoniae	feces	Homo sapiens sapiens	scaffold	Russia	-	GCA_007955265.1_ASM795526v1_genomic.fna
Klebsiella pneumoniae	feces	Homo sapiens sapiens	scaffold	Russia	-	GCA_007955275.1_ASM795527v1_genomic.fna
Klebsiella pneumoniae	feces	Homo sapiens sapiens	scaffold	Russia	-	GCA_007955285.1_ASM795528v1_genomic.fna
Klebsiella pneumoniae	feces	Homo sapiens sapiens	scaffold	Russia	-	GCA_007955345.1_ASM795534v1_genomic.fna
Klebsiella pneumoniae	urine	Homo sapiens	scaffold	Portugal	-	GCA_007993515.1_ASM799351v1_genomic.fna
Klebsiella pneumoniae	miss	Homo sapiens	scaffold	Portugal	-	GCA_007993525.1_ASM799352v1_genomic.fna
Klebsiella pneumoniae	Exudate	Homo sapiens	scaffold	Portugal	-	GCA_007993545.1_ASM799354v1_genomic.fna
Klebsiella pneumoniae	urine	Homo sapiens	scaffold	Portugal	-	GCA_007993565.1_ASM799356v1_genomic.fna
Klebsiella pneumoniae	Rectal swab	Homo sapiens	scaffold	Portugal	-	GCA_007993615.1_ASM799361v1_genomic.fna
Klebsiella pneumoniae	Rectal swab	Homo sapiens	scaffold	Portugal	-	GCA_007993625.1_ASM799362v1_genomic.fna
Klebsiella pneumoniae	sputum	Homo sapiens	scaffold	China	-	GCA_008087355.1_ASM808735v1_genomic.fna
Klebsiella pneumoniae	sputum	Homo sapiens	scaffold	China	-	GCA_008087375.1_ASM808737v1_genomic.fna
Klebsiella pneumoniae	feces	Homo sapiens	scaffold	United Kingdom	-	GCA_008119805.1_ASM811980v1_genomic.fna
Klebsiella pneumoniae	feces	Homo sapiens	scaffold	United Kingdom	-	GCA_008119815.1_ASM811981v1_genomic.fna
Klebsiella pneumoniae	feces	Homo sapiens	scaffold	United Kingdom	-	GCA_008119845.1_ASM811984v1_genomic.fna
Klebsiella pneumoniae	feces	Homo sapiens	scaffold	United Kingdom	-	GCA_008120045.1_ASM812004v1_genomic.fna
Klebsiella pneumoniae	feces	Homo sapiens	scaffold	United Kingdom	-	GCA_008120075.1_ASM812007v1_genomic.fna
Klebsiella pneumoniae	feces	Homo sapiens	scaffold	United Kingdom	-	GCA_008120115.1_ASM812011v1_genomic.fna
Klebsiella pneumoniae	feces	Homo sapiens	scaffold	United Kingdom	-	GCA_008120205.1_ASM812020v1_genomic.fna
Klebsiella pneumoniae	feces	Homo sapiens	scaffold	United Kingdom	-	GCA_008120365.1_ASM812036v1_genomic.fna
Klebsiella pneumoniae	feces	Homo sapiens	scaffold	United Kingdom	-	GCA_008120585.1_ASM812058v1_genomic.fna
Klebsiella pneumoniae	feces	Homo sapiens	scaffold	United Kingdom	-	GCA_008120605.1_ASM812060v1_genomic.fna
Klebsiella pneumoniae	feces	Homo sapiens	scaffold	United Kingdom	-	GCA_008120615.1_ASM812061v1_genomic.fna
Klebsiella pneumoniae	feces	Homo sapiens	scaffold	United Kingdom	-	GCA_008120645.1_ASM812064v1_genomic.fna
Klebsiella pneumoniae	feces	Homo sapiens	scaffold	United Kingdom	-	GCA_008120665.1_ASM812066v1_genomic.fna
Klebsiella pneumoniae	feces	Homo sapiens	scaffold	United Kingdom	-	GCA_008120675.1_ASM812067v1_genomic.fna
Klebsiella pneumoniae	feces	Homo sapiens	scaffold	United Kingdom	-	GCA_008120705.1_ASM812070v1_genomic.fna
Klebsiella pneumoniae	feces	Homo sapiens	scaffold	United Kingdom	-	GCA_008120725.1_ASM812072v1_genomic.fna
Klebsiella pneumoniae	feces	Homo sapiens	scaffold	United Kingdom	-	GCA_008120755.1_ASM812075v1_genomic.fna
Klebsiella pneumoniae	feces	Homo sapiens	scaffold	United Kingdom	-	GCA_008120765.1_ASM812076v1_genomic.fna
Klebsiella pneumoniae	feces	Homo sapiens	scaffold	United Kingdom	-	GCA_008120775.1_ASM812077v1_genomic.fna
Klebsiella pneumoniae	miss	Homo sapiens	scaffold	USA	-	GCA_008245285.1_ASM824528v1_genomic.fna
Klebsiella pneumoniae	Sputamentum	Homo sapiens	scaffold	China	-	GCA_008630085.1_ASM863008v1_genomic.fna
Klebsiella pneumoniae	abdominal fluid	Homo sapiens	scaffold	China	-	GCA_008630125.1_ASM863012v1_genomic.fna
Klebsiella pneumoniae	Sputamentum	Homo sapiens	scaffold	China	-	GCA_008630175.1_ASM863017v1_genomic.fna
Klebsiella pneumoniae	blood	Homo sapiens	scaffold	China	-	GCA_008630195.1_ASM863019v1_genomic.fna
Klebsiella pneumoniae	urine	Homo sapiens	scaffold	China	-	GCA_008630215.1_ASM863021v1_genomic.fna
Klebsiella pneumoniae	Sputamentum	Homo sapiens	scaffold	China	-	GCA_008630225.1_ASM863022v1_genomic.fna
Klebsiella pneumoniae	Wound secretion	Homo sapiens	scaffold	China	-	GCA_008630255.1_ASM863025v1_genomic.fna
Klebsiella pneumoniae	Sputamentum	Homo sapiens	scaffold	China	-	GCA_008630305.1_ASM863030v1_genomic.fna
Klebsiella pneumoniae	Sputamentum	Homo sapiens	scaffold	China	-	GCA_008630315.1_ASM863031v1_genomic.fna
Klebsiella pneumoniae	Sputamentum	Homo sapiens	scaffold	China	-	GCA_008630355.1_ASM863035v1_genomic.fna
Klebsiella pneumoniae	Sputamentum	Homo sapiens	scaffold	China	-	GCA_008630475.1_ASM863047v1_genomic.fna
Klebsiella pneumoniae	miss	Homo sapiens	scaffold	France	-	GCA_008630965.1_ASM863096v1_genomic.fna
Klebsiella pneumoniae	miss	Homo sapiens	scaffold	France	-	GCA_008630975.1_ASM863097v1_genomic.fna
Klebsiella pneumoniae	miss	Homo sapiens	scaffold	USA	-	GCA_008630985.1_ASM863098v1_genomic.fna
Klebsiella pneumoniae	miss	Homo sapiens	scaffold	France	-	GCA_008631055.1_ASM863105v1_genomic.fna
Klebsiella pneumoniae	miss	Homo sapiens	scaffold	France	-	GCA_008631065.1_ASM863106v1_genomic.fna
Klebsiella pneumoniae	miss	Homo sapiens	scaffold	France	-	GCA_008631075.1_ASM863107v1_genomic.fna
Klebsiella pneumoniae	miss	Homo sapiens	scaffold	France	-	GCA_008631085.1_ASM863108v1_genomic.fna
Klebsiella pneumoniae	miss	Homo sapiens	scaffold	France	-	GCA_008631135.1_ASM863113v1_genomic.fna
Klebsiella pneumoniae	miss	Homo sapiens	scaffold	France	-	GCA_008631145.1_ASM863114v1_genomic.fna
Klebsiella pneumoniae	miss	Homo sapiens	scaffold	France	-	GCA_008631165.1_ASM863116v1_genomic.fna
Klebsiella pneumoniae	miss	Homo sapiens	scaffold	France	-	GCA_008631185.1_ASM863118v1_genomic.fna
Klebsiella pneumoniae	miss	Homo sapiens	scaffold	France	-	GCA_008631195.1_ASM863119v1_genomic.fna
Klebsiella pneumoniae	Damaged skin	Homo sapiens	scaffold	China	-	GCA_008632735.1_ASM863273v1_genomic.fna
Klebsiella pneumoniae	urine	Homo sapiens	scaffold	China	-	GCA_008632745.1_ASM863274v1_genomic.fna
Klebsiella pneumoniae	Wound secretion	Homo sapiens	scaffold	China	-	GCA_008632765.1_ASM863276v1_genomic.fna
Klebsiella pneumoniae	abdominal fluid	Homo sapiens	scaffold	China	-	GCA_008632785.1_ASM863278v1_genomic.fna
Klebsiella pneumoniae	blood	Homo sapiens	scaffold	China	-	GCA_008632835.1_ASM863283v1_genomic.fna
Klebsiella pneumoniae	abdominal fluid	Homo sapiens	scaffold	China	-	GCA_008632875.1_ASM863287v1_genomic.fna
Klebsiella pneumoniae	swab	Homo sapiens	scaffold	China	-	GCA_008634545.1_ASM863454v1_genomic.fna
Klebsiella pneumoniae	sputum	Homo sapiens	scaffold	China	-	GCA_008634555.1_ASM863455v1_genomic.fna
Klebsiella pneumoniae	secreta	Homo sapiens	scaffold	China	-	GCA_008634585.1_ASM863458v1_genomic.fna
Klebsiella pneumoniae	urine	Homo sapiens	scaffold	China	-	GCA_008634595.1_ASM863459v1_genomic.fna
Klebsiella pneumoniae	sputum	Homo sapiens	scaffold	China	-	GCA_008634675.1_ASM863467v1_genomic.fna
Klebsiella pneumoniae	secreta	Homo sapiens	scaffold	China	-	GCA_008634705.1_ASM863470v1_genomic.fna
Klebsiella pneumoniae	sputum	Homo sapiens	scaffold	China	-	GCA_008634715.1_ASM863471v1_genomic.fna
Klebsiella pneumoniae	secreta	Homo sapiens	scaffold	China	-	GCA_008634725.1_ASM863472v1_genomic.fna
Klebsiella pneumoniae	Drainage of fluid	Homo sapiens	scaffold	China	-	GCA_008634755.1_ASM863475v1_genomic.fna
Klebsiella pneumoniae	sputum	Homo sapiens	scaffold	China	-	GCA_008634795.1_ASM863479v1_genomic.fna
Klebsiella pneumoniae	Patient7 sputum	Homo sapiens	scaffold	China	-	GCA_008756805.1_ASM875680v1_genomic.fna
Klebsiella pneumoniae	Patient6 sputum	Homo sapiens	scaffold	China	-	GCA_008756815.1_ASM875681v1_genomic.fna
Klebsiella pneumoniae	Patient5 sputum	Homo sapiens	scaffold	China	-	GCA_008756855.1_ASM875685v1_genomic.fna
Klebsiella pneumoniae	Patient4 sputum	Homo sapiens	scaffold	China	-	GCA_008756865.1_ASM875686v1_genomic.fna
Klebsiella pneumoniae	Patient3 sputum	Homo sapiens	scaffold	China	-	GCA_008756885.1_ASM875688v1_genomic.fna
Klebsiella pneumoniae	Patient2 sputum	Homo sapiens	scaffold	China	-	GCA_008756905.1_ASM875690v1_genomic.fna
Klebsiella pneumoniae	Patient1 sputum	Homo sapiens	scaffold	China	-	GCA_008756915.1_ASM875691v1_genomic.fna
Klebsiella pneumoniae	Abdominal infection	Homo sapiens	scaffold	China	-	GCA_008830445.1_ASM883044v1_genomic.fna
Klebsiella pneumoniae	Abdominal infection	Homo sapiens	scaffold	China	-	GCA_008830485.1_ASM883048v1_genomic.fna
Klebsiella pneumoniae	Abdominal infection	Homo sapiens	scaffold	China	-	GCA_008830495.1_ASM883049v1_genomic.fna
Klebsiella pneumoniae	Abdominal infection	Homo sapiens	scaffold	China	-	GCA_008830505.1_ASM883050v1_genomic.fna
Klebsiella pneumoniae	liver abscess	Homo sapiens	scaffold	China	-	GCA_008830545.1_ASM883054v1_genomic.fna
Klebsiella pneumoniae	liver abscess	Homo sapiens	scaffold	China	-	GCA_008830555.1_ASM883055v1_genomic.fna
Klebsiella pneumoniae	Abdominal infection	Homo sapiens	scaffold	China	-	GCA_008830585.1_ASM883058v1_genomic.fna
Klebsiella pneumoniae	Primary bloodstream infection	Homo sapiens	scaffold	China	-	GCA_008830595.1_ASM883059v1_genomic.fna
Klebsiella pneumoniae	Intracranial infection	Homo sapiens	scaffold	China	-	GCA_008830645.1_ASM883064v1_genomic.fna
Klebsiella pneumoniae	Abdominal infection	Homo sapiens	scaffold	China	-	GCA_008830725.1_ASM883072v1_genomic.fna
Klebsiella pneumoniae	wound	Homo sapiens	scaffold	Spain	-	GCA_008867545.1_ASM886754v1_genomic.fna
Klebsiella pneumoniae	urine	Homo sapiens	scaffold	Spain	-	GCA_008867615.1_ASM886761v1_genomic.fna
Klebsiella pneumoniae	urine	Homo sapiens	scaffold	Spain	-	GCA_008867625.1_ASM886762v1_genomic.fna
Klebsiella pneumoniae	blood	Homo sapiens	scaffold	Spain	-	GCA_008867635.1_ASM886763v1_genomic.fna
Klebsiella pneumoniae	miss	Homo sapiens	scaffold	Spain	-	GCA_008867645.1_ASM886764v1_genomic.fna
Klebsiella pneumoniae	Rectal Swab	Homo sapiens	scaffold	Spain	-	GCA_008867705.1_ASM886770v1_genomic.fna
Klebsiella pneumoniae	miss	Homo sapiens	scaffold	Spain	-	GCA_008867735.1_ASM886773v1_genomic.fna
Klebsiella pneumoniae	Rectal swab	Homo sapiens	scaffold	Spain	-	GCA_008867795.1_ASM886779v1_genomic.fna
Klebsiella pneumoniae	Abdominal	Homo sapiens	scaffold	Spain	-	GCA_008867865.1_ASM886786v1_genomic.fna
Klebsiella pneumoniae	urine	Homo sapiens	scaffold	Spain	-	GCA_008867885.1_ASM886788v1_genomic.fna
Klebsiella pneumoniae	Abdominal	Homo sapiens	scaffold	Spain	-	GCA_008867905.1_ASM886790v1_genomic.fna
Klebsiella pneumoniae	urine	Homo sapiens	scaffold	Spain	-	GCA_008867915.1_ASM886791v1_genomic.fna
Klebsiella pneumoniae	wound	Homo sapiens	scaffold	Spain	-	GCA_008867955.1_ASM886795v1_genomic.fna
Klebsiella pneumoniae	urine	Homo sapiens	scaffold	Spain	-	GCA_008868045.1_ASM886804v1_genomic.fna
Klebsiella pneumoniae	miss	Homo sapiens	scaffold	Spain	-	GCA_008868065.1_ASM886806v1_genomic.fna
Klebsiella pneumoniae	miss	Homo sapiens	scaffold	Spain	-	GCA_008868075.1_ASM886807v1_genomic.fna
Klebsiella pneumoniae	clinical sample	Homo sapiens	scaffold	France	-	GCA_009207685.1_ASM920768v1_genomic.fna
Klebsiella pneumoniae	clinical sample	Homo sapiens	scaffold	France	-	GCA_009207695.1_ASM920769v1_genomic.fna
Klebsiella pneumoniae	clinical sample	Homo sapiens	scaffold	France	-	GCA_009207705.1_ASM920770v1_genomic.fna
Klebsiella pneumoniae	clinical sample	Homo sapiens	scaffold	France	-	GCA_009207715.1_ASM920771v1_genomic.fna
Klebsiella pneumoniae	clinical sample	Homo sapiens	scaffold	France	-	GCA_009207725.1_ASM920772v1_genomic.fna
Klebsiella pneumoniae	clinical sample	Homo sapiens	scaffold	France	-	GCA_009207775.1_ASM920777v1_genomic.fna
Klebsiella pneumoniae	clinical sample	Homo sapiens	scaffold	France	-	GCA_009207805.1_ASM920780v1_genomic.fna
Klebsiella pneumoniae	clinical sample	Homo sapiens	scaffold	France	-	GCA_009207815.1_ASM920781v1_genomic.fna
Klebsiella pneumoniae	clinical sample	Homo sapiens	scaffold	France	-	GCA_009207825.1_ASM920782v1_genomic.fna
Klebsiella pneumoniae	clinical sample	Homo sapiens	scaffold	France	-	GCA_009207835.1_ASM920783v1_genomic.fna
Klebsiella pneumoniae	clinical sample	Homo sapiens	scaffold	France	-	GCA_009207855.1_ASM920785v1_genomic.fna
Klebsiella pneumoniae	clinical sample	Homo sapiens	scaffold	France	-	GCA_009207865.1_ASM920786v1_genomic.fna
Klebsiella pneumoniae	clinical sample	Homo sapiens	scaffold	France	-	GCA_009207895.1_ASM920789v1_genomic.fna
Klebsiella pneumoniae	clinical sample	Homo sapiens	scaffold	France	-	GCA_009207925.1_ASM920792v1_genomic.fna
Klebsiella pneumoniae	clinical sample	Homo sapiens	scaffold	France	-	GCA_009207935.1_ASM920793v1_genomic.fna
Klebsiella pneumoniae	clinical sample	Homo sapiens	scaffold	France	-	GCA_009207975.1_ASM920797v1_genomic.fna
Klebsiella pneumoniae	clinical sample	Homo sapiens	scaffold	France	-	GCA_009207995.1_ASM920799v1_genomic.fna
Klebsiella pneumoniae	clinical sample	Homo sapiens	scaffold	France	-	GCA_009208035.1_ASM920803v1_genomic.fna
Klebsiella pneumoniae	clinical sample	Homo sapiens	scaffold	France	-	GCA_009208045.1_ASM920804v1_genomic.fna
Klebsiella pneumoniae	clinical sample	Homo sapiens	scaffold	France	-	GCA_009208605.1_ASM920860v1_genomic.fna
Klebsiella pneumoniae	clinical sample	Homo sapiens	scaffold	France	-	GCA_009208625.1_ASM920862v1_genomic.fna
Klebsiella pneumoniae	clinical sample	Homo sapiens	scaffold	France	-	GCA_009208645.1_ASM920864v1_genomic.fna
Klebsiella pneumoniae	clinical sample	Homo sapiens	scaffold	France	-	GCA_009208665.1_ASM920866v1_genomic.fna
Klebsiella pneumoniae	clinical sample	Homo sapiens	scaffold	France	-	GCA_009208675.1_ASM920867v1_genomic.fna
Klebsiella pneumoniae	clinical sample	Homo sapiens	scaffold	France	-	GCA_009208685.1_ASM920868v1_genomic.fna
Klebsiella pneumoniae	clinical sample	Homo sapiens	scaffold	France	-	GCA_009208715.1_ASM920871v1_genomic.fna
Klebsiella pneumoniae	clinical	Homo sapiens	scaffold	Romania	-	GCA_009646275.1_ASM964627v1_genomic.fna
Klebsiella pneumoniae	feces	Homo sapiens	scaffold	China	-	GCA_009647385.1_ASM964738v1_genomic.fna
Klebsiella pneumoniae	feces	Homo sapiens	scaffold	China	-	GCA_009647715.1_ASM964771v1_genomic.fna
Klebsiella pneumoniae	feces	Homo sapiens	scaffold	China	-	GCA_009647835.1_ASM964783v1_genomic.fna
Klebsiella pneumoniae subsp. pneumoniae	urine	Homo sapiens	scaffold	Brazil	-	GCA_009651015.1_ASM965101v1_genomic.fna
Klebsiella pneumoniae subsp. pneumoniae	Nasal secretion	Homo sapiens	scaffold	Brazil	-	GCA_009651075.1_ASM965107v1_genomic.fna
Klebsiella pneumoniae	blood	Homo sapiens	scaffold	Russia	-	GCA_009660375.1_ASM966037v1_genomic.fna
Klebsiella pneumoniae	feces	Homo sapiens	scaffold	Russia	-	GCA_009661035.1_ASM966103v1_genomic.fna
Klebsiella pneumoniae	urine	Homo sapiens	scaffold	Russia	-	GCA_009661095.1_ASM966109v1_genomic.fna
Klebsiella pneumoniae	sputum	Homo sapiens	scaffold	Russia	-	GCA_009661105.1_ASM966110v1_genomic.fna
Klebsiella pneumoniae	urine	Homo sapiens	scaffold	Russia	-	GCA_009661115.1_ASM966111v1_genomic.fna
Klebsiella pneumoniae	blood	Homo sapiens	scaffold	Russia	-	GCA_009661155.1_ASM966115v1_genomic.fna
Klebsiella pneumoniae	blood	Homo sapiens	scaffold	Russia	-	GCA_009661175.1_ASM966117v1_genomic.fna
Klebsiella pneumoniae	abdominal cavity apostem	Homo sapiens	scaffold	Russia	-	GCA_009661195.1_ASM966119v1_genomic.fna
Klebsiella pneumoniae	bronchoalveolar lavage	Homo sapiens	scaffold	Russia	-	GCA_009661205.1_ASM966120v1_genomic.fna
Klebsiella pneumoniae	traumatic discharge	Homo sapiens	scaffold	Russia	-	GCA_009661215.1_ASM966121v1_genomic.fna
Klebsiella pneumoniae	blood	Homo sapiens	scaffold	Russia	-	GCA_009661255.1_ASM966125v1_genomic.fna
Klebsiella pneumoniae	traumatic discharge	Homo sapiens	scaffold	Russia	-	GCA_009661265.1_ASM966126v1_genomic.fna
Klebsiella pneumoniae	urine	Homo sapiens	scaffold	Russia	-	GCA_009661295.1_ASM966129v1_genomic.fna
Klebsiella pneumoniae	feces	Homo sapiens	scaffold	Russia	-	GCA_009661305.1_ASM966130v1_genomic.fna
Klebsiella pneumoniae	urine	Homo sapiens	scaffold	Russia	-	GCA_009661315.1_ASM966131v1_genomic.fna
Klebsiella pneumoniae	sputum	Homo sapiens	scaffold	Russia	-	GCA_009661355.1_ASM966135v1_genomic.fna
Klebsiella pneumoniae	blood	Homo sapiens	scaffold	Russia	-	GCA_009661375.1_ASM966137v1_genomic.fna
Klebsiella pneumoniae	nasal swab	Homo sapiens	scaffold	Russia	-	GCA_009661385.1_ASM966138v1_genomic.fna
Klebsiella pneumoniae	Gall bladder	Homo sapiens	scaffold	Russia	-	GCA_009661415.1_ASM966141v1_genomic.fna
Klebsiella pneumoniae	traumatic discharge	Homo sapiens	scaffold	Russia	-	GCA_009661425.1_ASM966142v1_genomic.fna
Klebsiella pneumoniae	blood	Homo sapiens	scaffold	Russia	-	GCA_009661455.1_ASM966145v1_genomic.fna
Klebsiella pneumoniae	urine	Homo sapiens	scaffold	Russia	-	GCA_009661485.1_ASM966148v1_genomic.fna
Klebsiella pneumoniae	blood	Homo sapiens	scaffold	Russia	-	GCA_009661535.1_ASM966153v1_genomic.fna
Klebsiella pneumoniae	blood	Homo sapiens	scaffold	Russia	-	GCA_009661555.1_ASM966155v1_genomic.fna
Klebsiella pneumoniae	blood	Homo sapiens	scaffold	Russia	-	GCA_009661575.1_ASM966157v1_genomic.fna
Klebsiella pneumoniae	urine	Homo sapiens	scaffold	Russia	-	GCA_009661585.1_ASM966158v1_genomic.fna
Klebsiella pneumoniae	urine	Homo sapiens	scaffold	Russia	-	GCA_009661595.1_ASM966159v1_genomic.fna
Klebsiella pneumoniae	granulation tissue	Homo sapiens	scaffold	Russia	-	GCA_009661615.1_ASM966161v1_genomic.fna
Klebsiella pneumoniae	tracheal aspirate	Homo sapiens	scaffold	Russia	-	GCA_009661655.1_ASM966165v1_genomic.fna
Klebsiella pneumoniae	urine	Homo sapiens	scaffold	Russia	-	GCA_009661665.1_ASM966166v1_genomic.fna
Klebsiella pneumoniae	tracheal aspirate	Homo sapiens	scaffold	Russia	-	GCA_009661675.1_ASM966167v1_genomic.fna
Klebsiella pneumoniae	sputum	Homo sapiens	scaffold	Russia	-	GCA_009661705.1_ASM966170v1_genomic.fna
Klebsiella pneumoniae	sputum	Homo sapiens	scaffold	Russia	-	GCA_009661725.1_ASM966172v1_genomic.fna
Klebsiella pneumoniae	tracheal aspirate	Homo sapiens	scaffold	Russia	-	GCA_009661805.1_ASM966180v1_genomic.fna
Klebsiella pneumoniae	urine	Homo sapiens	scaffold	Bangladesh	-	GCA_009707215.1_ASM970721v1_genomic.fna
Klebsiella pneumoniae	clinical	Homo sapiens	scaffold	Romania	-	GCA_009710025.1_ASM971002v1_genomic.fna
Klebsiella pneumoniae	clinical	Homo sapiens	scaffold	Romania	-	GCA_009710065.1_ASM971006v1_genomic.fna
Klebsiella pneumoniae	clinical	Homo sapiens	scaffold	Romania	-	GCA_009710085.1_ASM971008v1_genomic.fna
Klebsiella pneumoniae	clinical	Homo sapiens	scaffold	Romania	-	GCA_009710105.1_ASM971010v1_genomic.fna
Klebsiella pneumoniae	clinical	Homo sapiens	scaffold	Romania	-	GCA_009710125.1_ASM971012v1_genomic.fna
Klebsiella pneumoniae	clinical	Homo sapiens	scaffold	Romania	-	GCA_009710135.1_ASM971013v1_genomic.fna
Klebsiella pneumoniae	clinical	Homo sapiens	scaffold	Romania	-	GCA_009710195.1_ASM971019v1_genomic.fna
Klebsiella pneumoniae	clinical	Homo sapiens	scaffold	Romania	-	GCA_009710205.1_ASM971020v1_genomic.fna
Klebsiella pneumoniae subsp. pneumoniae	urine	Homo sapiens	scaffold	Italy	-	GCA_009738595.1_ASM973859v1_genomic.fna
Klebsiella pneumoniae	urine	Homo sapiens	scaffold	Spain	-	GCA_009746145.1_ASM974614v1_genomic.fna
Klebsiella pneumoniae	urine	Homo sapiens	scaffold	Spain	-	GCA_009746155.1_ASM974615v1_genomic.fna
Klebsiella pneumoniae	Axillary smear	Homo sapiens	scaffold	Spain	-	GCA_009746165.1_ASM974616v1_genomic.fna
Klebsiella pneumoniae	urine	Homo sapiens	scaffold	Spain	-	GCA_009746185.1_ASM974618v1_genomic.fna
Klebsiella pneumoniae	Axillary smear	Homo sapiens	scaffold	Spain	-	GCA_009746205.1_ASM974620v1_genomic.fna
Klebsiella pneumoniae	Rectal	Homo sapiens	scaffold	Spain	-	GCA_009746245.1_ASM974624v1_genomic.fna
Klebsiella pneumoniae	Rectal	Homo sapiens	scaffold	Spain	-	GCA_009746265.1_ASM974626v1_genomic.fna
Klebsiella pneumoniae	sputum	Homo sapiens	scaffold	Spain	-	GCA_009746275.1_ASM974627v1_genomic.fna
Klebsiella pneumoniae	respiratory track	Homo sapiens	scaffold	Spain	-	GCA_009746285.1_ASM974628v1_genomic.fna
Klebsiella pneumoniae	Rectal	Homo sapiens	scaffold	Spain	-	GCA_009746315.1_ASM974631v1_genomic.fna
Klebsiella pneumoniae	Rectal	Homo sapiens	scaffold	Spain	-	GCA_009746325.1_ASM974632v1_genomic.fna
Klebsiella pneumoniae	urine	Homo sapiens	scaffold	Spain	-	GCA_009746365.1_ASM974636v1_genomic.fna
Klebsiella pneumoniae	Rectal	Homo sapiens	scaffold	Spain	-	GCA_009746375.1_ASM974637v1_genomic.fna
Klebsiella pneumoniae	Wounds	Homo sapiens	scaffold	Spain	-	GCA_009746385.1_ASM974638v1_genomic.fna
Klebsiella pneumoniae	blood	Homo sapiens	scaffold	Spain	-	GCA_009746405.1_ASM974640v1_genomic.fna
Klebsiella pneumoniae	Wounds	Homo sapiens	scaffold	Spain	-	GCA_009746435.1_ASM974643v1_genomic.fna
Klebsiella pneumoniae	Blood sample from neonates	Homo sapiens	scaffold	India	-	GCA_009763315.1_ASM976331v1_genomic.fna
Klebsiella pneumoniae	miss	Homo sapiens	scaffold	Lebanon	-	GCA_009795695.1_ASM979569v1_genomic.fna
Klebsiella pneumoniae	miss	Homo sapiens	scaffold	China	-	GCA_009807065.1_ASM980706v1_genomic.fna
Klebsiella pneumoniae	miss	Homo sapiens	scaffold	United Kingdom	-	GCA_009825455.1_ASM982545v1_genomic.fna
Klebsiella pneumoniae	miss	Homo sapiens	scaffold	USA	-	GCA_009825475.1_ASM982547v1_genomic.fna
Klebsiella pneumoniae	miss	Homo sapiens	scaffold	Greece	-	GCA_009825485.1_ASM982548v1_genomic.fna
Klebsiella pneumoniae	miss	Homo sapiens	scaffold	USA	-	GCA_009825495.1_ASM982549v1_genomic.fna
Klebsiella pneumoniae	miss	Homo sapiens	scaffold	Greece	-	GCA_009825505.1_ASM982550v1_genomic.fna
Klebsiella pneumoniae	miss	Homo sapiens	scaffold	USA	-	GCA_009825515.1_ASM982551v1_genomic.fna
Klebsiella pneumoniae	miss	Homo sapiens	scaffold	USA	-	GCA_009825575.1_ASM982557v1_genomic.fna
Klebsiella pneumoniae	miss	Homo sapiens	scaffold	Netherlands	-	GCA_009825605.1_ASM982560v1_genomic.fna
Klebsiella pneumoniae	miss	Homo sapiens	scaffold	Greece	-	GCA_009825615.1_ASM982561v1_genomic.fna
Klebsiella pneumoniae	miss	Homo sapiens	scaffold	Greece	-	GCA_009825635.1_ASM982563v1_genomic.fna
Klebsiella pneumoniae	miss	Homo sapiens	scaffold	Greece	-	GCA_009825675.1_ASM982567v1_genomic.fna
Klebsiella pneumoniae	miss	Homo sapiens	scaffold	Greece	-	GCA_009825685.1_ASM982568v1_genomic.fna
Klebsiella pneumoniae	miss	Homo sapiens	scaffold	Greece	-	GCA_009825695.1_ASM982569v1_genomic.fna
Klebsiella pneumoniae	miss	Homo sapiens	scaffold	Greece	-	GCA_009825725.1_ASM982572v1_genomic.fna
Klebsiella pneumoniae	miss	Homo sapiens	scaffold	United Kingdom	-	GCA_009825755.1_ASM982575v1_genomic.fna
Klebsiella pneumoniae	miss	Homo sapiens	scaffold	USA	-	GCA_009825775.1_ASM982577v1_genomic.fna
Klebsiella pneumoniae	miss	Homo sapiens	scaffold	USA	-	GCA_009825785.1_ASM982578v1_genomic.fna
Klebsiella pneumoniae	miss	Homo sapiens	scaffold	USA	-	GCA_009825795.1_ASM982579v1_genomic.fna
Klebsiella pneumoniae	miss	Homo sapiens	scaffold	USA	-	GCA_009825815.1_ASM982581v1_genomic.fna
Klebsiella pneumoniae	miss	Homo sapiens	scaffold	USA	-	GCA_009825855.1_ASM982585v1_genomic.fna
Klebsiella pneumoniae	miss	Homo sapiens	scaffold	United Kingdom	-	GCA_009825875.1_ASM982587v1_genomic.fna
Klebsiella pneumoniae	miss	Homo sapiens	scaffold	Greece	-	GCA_009825905.1_ASM982590v1_genomic.fna
Klebsiella pneumoniae	miss	Homo sapiens	scaffold	Greece	-	GCA_009825915.1_ASM982591v1_genomic.fna
Klebsiella pneumoniae	miss	Homo sapiens	scaffold	France	-	GCA_009825955.1_ASM982595v1_genomic.fna
Klebsiella pneumoniae	miss	Homo sapiens	scaffold	USA	-	GCA_009825975.1_ASM982597v1_genomic.fna
Klebsiella pneumoniae	miss	Homo sapiens	scaffold	USA	-	GCA_009825995.1_ASM982599v1_genomic.fna
Klebsiella pneumoniae	miss	Homo sapiens	scaffold	USA	-	GCA_009826015.1_ASM982601v1_genomic.fna
Klebsiella pneumoniae	miss	Homo sapiens	scaffold	USA	-	GCA_009826055.1_ASM982605v1_genomic.fna
Klebsiella pneumoniae	miss	Homo sapiens	scaffold	USA	-	GCA_009826075.1_ASM982607v1_genomic.fna
Klebsiella pneumoniae	miss	Homo sapiens	scaffold	USA	-	GCA_009826085.1_ASM982608v1_genomic.fna
Klebsiella pneumoniae	miss	Homo sapiens	scaffold	USA	-	GCA_009826095.1_ASM982609v1_genomic.fna
Klebsiella pneumoniae	miss	Homo sapiens	scaffold	USA	-	GCA_009826105.1_ASM982610v1_genomic.fna
Klebsiella pneumoniae	miss	Homo sapiens	scaffold	USA	-	GCA_009826155.1_ASM982615v1_genomic.fna
Klebsiella pneumoniae	miss	Homo sapiens	scaffold	USA	-	GCA_009826175.1_ASM982617v1_genomic.fna
Klebsiella pneumoniae	miss	Homo sapiens	scaffold	France	-	GCA_009826195.1_ASM982619v1_genomic.fna
Klebsiella pneumoniae	miss	Homo sapiens	scaffold	USA	-	GCA_009826225.1_ASM982622v1_genomic.fna
Klebsiella pneumoniae	miss	Homo sapiens	scaffold	Greece	-	GCA_009826245.1_ASM982624v1_genomic.fna
Klebsiella pneumoniae	miss	Homo sapiens	scaffold	USA	-	GCA_009826275.1_ASM982627v1_genomic.fna
Klebsiella pneumoniae	miss	Homo sapiens	scaffold	USA	-	GCA_009826295.1_ASM982629v1_genomic.fna
Klebsiella pneumoniae	miss	Homo sapiens	scaffold	Greece	-	GCA_009826315.1_ASM982631v1_genomic.fna
Klebsiella pneumoniae	miss	Homo sapiens	scaffold	Greece	-	GCA_009826345.1_ASM982634v1_genomic.fna
Klebsiella pneumoniae	miss	Homo sapiens	scaffold	Greece	-	GCA_009826375.1_ASM982637v1_genomic.fna
Klebsiella pneumoniae	miss	Homo sapiens	scaffold	Greece	-	GCA_009826395.1_ASM982639v1_genomic.fna
Klebsiella pneumoniae	miss	Homo sapiens	scaffold	Greece	-	GCA_009826425.1_ASM982642v1_genomic.fna
Klebsiella pneumoniae	miss	Homo sapiens	scaffold	Greece	-	GCA_009826455.1_ASM982645v1_genomic.fna
Klebsiella pneumoniae	miss	Homo sapiens	scaffold	USA	-	GCA_009826475.1_ASM982647v1_genomic.fna
Klebsiella pneumoniae	miss	Homo sapiens	scaffold	Greece	-	GCA_009826495.1_ASM982649v1_genomic.fna
Klebsiella pneumoniae	miss	Homo sapiens	scaffold	Greece	-	GCA_009826505.1_ASM982650v1_genomic.fna
Klebsiella pneumoniae	miss	Homo sapiens	scaffold	Greece	-	GCA_009826555.1_ASM982655v1_genomic.fna
Klebsiella pneumoniae	miss	Homo sapiens	scaffold	Greece	-	GCA_009826575.1_ASM982657v1_genomic.fna
Klebsiella pneumoniae	miss	Homo sapiens	scaffold	Greece	-	GCA_009826595.1_ASM982659v1_genomic.fna
Klebsiella pneumoniae	miss	Homo sapiens	scaffold	Greece	-	GCA_009826605.1_ASM982660v1_genomic.fna
Klebsiella pneumoniae	miss	Homo sapiens	scaffold	Greece	-	GCA_009826615.1_ASM982661v1_genomic.fna
Klebsiella pneumoniae	miss	Homo sapiens	scaffold	Greece	-	GCA_009826655.1_ASM982665v1_genomic.fna
Klebsiella pneumoniae	miss	Homo sapiens	scaffold	Greece	-	GCA_009826665.1_ASM982666v1_genomic.fna
Klebsiella pneumoniae	miss	Homo sapiens	scaffold	Greece	-	GCA_009826695.1_ASM982669v1_genomic.fna
Klebsiella pneumoniae	miss	Homo sapiens	scaffold	Greece	-	GCA_009826705.1_ASM982670v1_genomic.fna
Klebsiella pneumoniae	miss	Homo sapiens	scaffold	Greece	-	GCA_009826755.1_ASM982675v1_genomic.fna
Klebsiella pneumoniae	miss	Homo sapiens	scaffold	Greece	-	GCA_009826775.1_ASM982677v1_genomic.fna
Klebsiella pneumoniae	miss	Homo sapiens	scaffold	Greece	-	GCA_009826795.1_ASM982679v1_genomic.fna
Klebsiella pneumoniae	miss	Homo sapiens	scaffold	Greece	-	GCA_009826835.1_ASM982683v1_genomic.fna
Klebsiella pneumoniae	stool	Homo sapiens	scaffold	USA	-	GCA_009832265.1_ASM983226v1_genomic.fna
Klebsiella pneumoniae	stool	Homo sapiens	scaffold	USA	-	GCA_009832535.1_ASM983253v1_genomic.fna
Klebsiella pneumoniae	rectal swab	Homo sapiens	scaffold	France	-	GCA_009856915.1_ASM985691v1_genomic.fna
Klebsiella pneumoniae	rectal swab	Homo sapiens	scaffold	France	-	GCA_009856955.1_ASM985695v1_genomic.fna
